# Supplementary material for: Catalyst- and solvent-free regiospecific SNHAr phosphinylation of pyridines with H-phosphinates mediated by benzoylphenylacetylene
Source: Royal Society of Chemistry journal article supplement (doi:10.1039/d4ob00661e), 2024-01-01

## Supporting Information

### **Catalyst- and solvent-free regiospecific S<sub>N</sub><sup>H</sup>Ar phosphinylation of pyridines with *H*-phosphinates mediated by benzoylphenylacetylene**

Kseniya O. Khrapova,<sup>a</sup> Pavel A. Volkov,<sup>a</sup> Anton A. Telezhkin,<sup>a</sup>  
Alexander I. Albanov,<sup>a</sup> Oleg N. Chupakhin<sup>b</sup> and Boris A. Trofimov\*<sup>a</sup>

<sup>a</sup> *A.E. Favorsky Irkutsk Institute of Chemistry, Siberian Branch of the Russian Academy of Sciences, 1 Favorsky St., Irkutsk 664033, Russian Federation*

<sup>b</sup> *I.Ya. Postovsky Institute of Organic Synthesis, Ural Branch of the Russian Academy of Sciences, 22/20 S. Kovalevskoi/Akademicheskaya St., Ekaterinburg 620219, Russian Federation*

#### **Table of contents**

|                       |            |
|-----------------------|------------|
| <b>1. NMR Spectra</b> | <b>S2</b>  |
| <b>2. IR Spectra</b>  | <b>S58</b> |

# 1. NMR Spectra

## Ethyl phenyl(pyridin-4-yl)phosphinate (3aa)

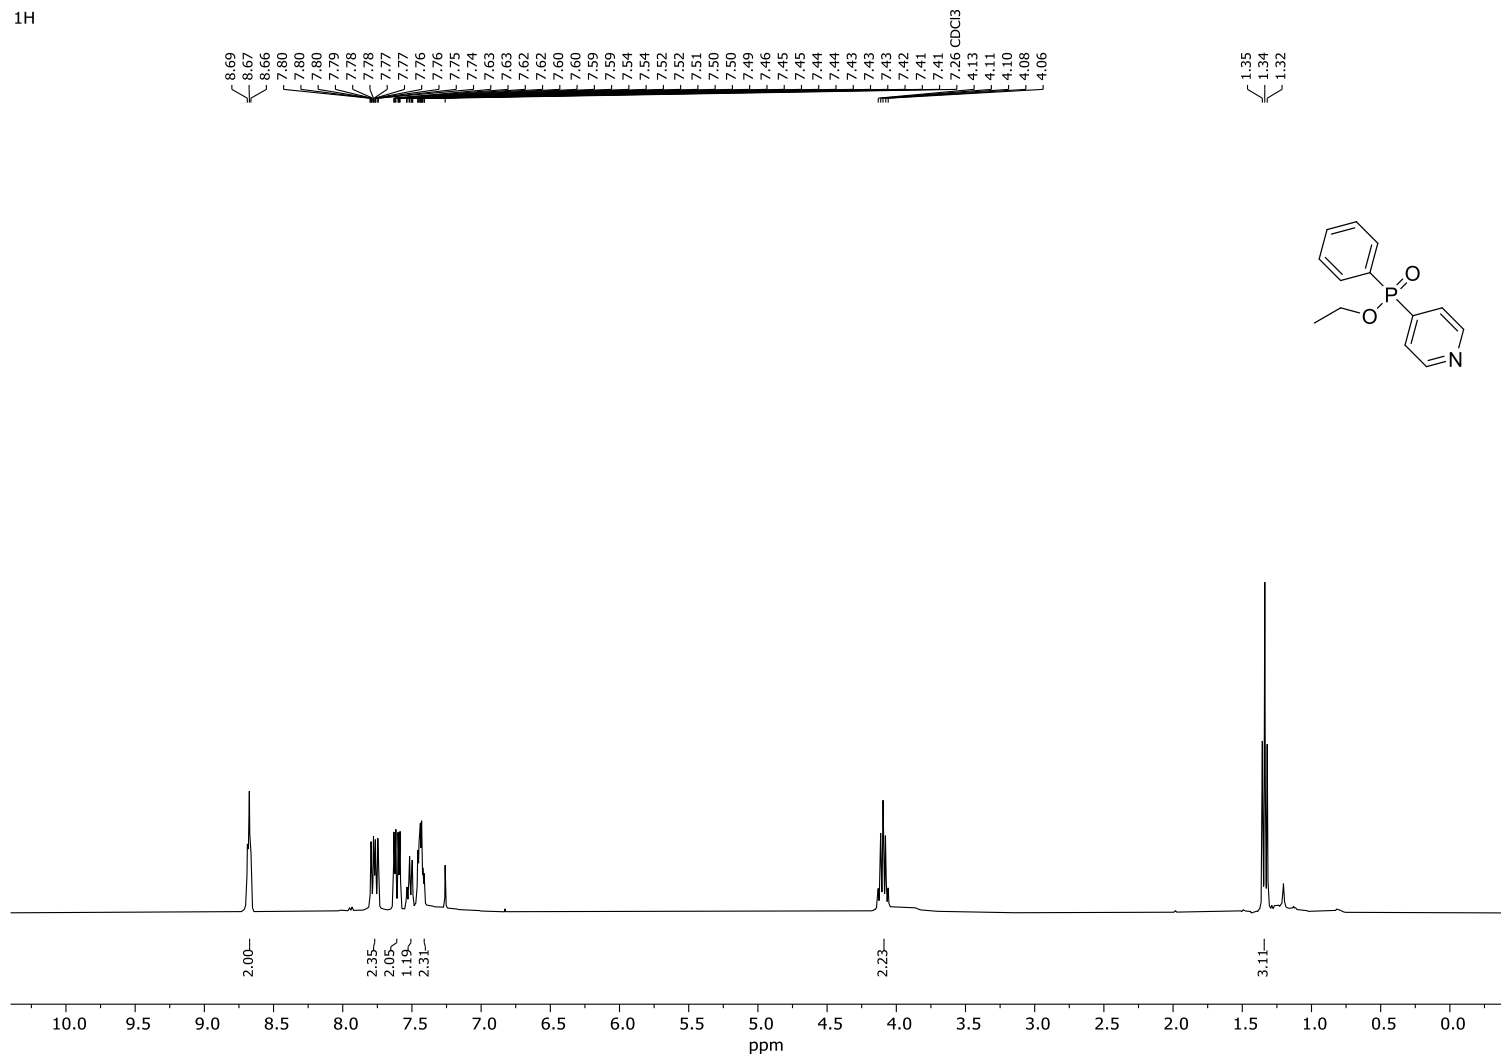

# Ethyl phenyl(pyridin-4-yl)phosphinate (3aa)

<sup>13</sup>C

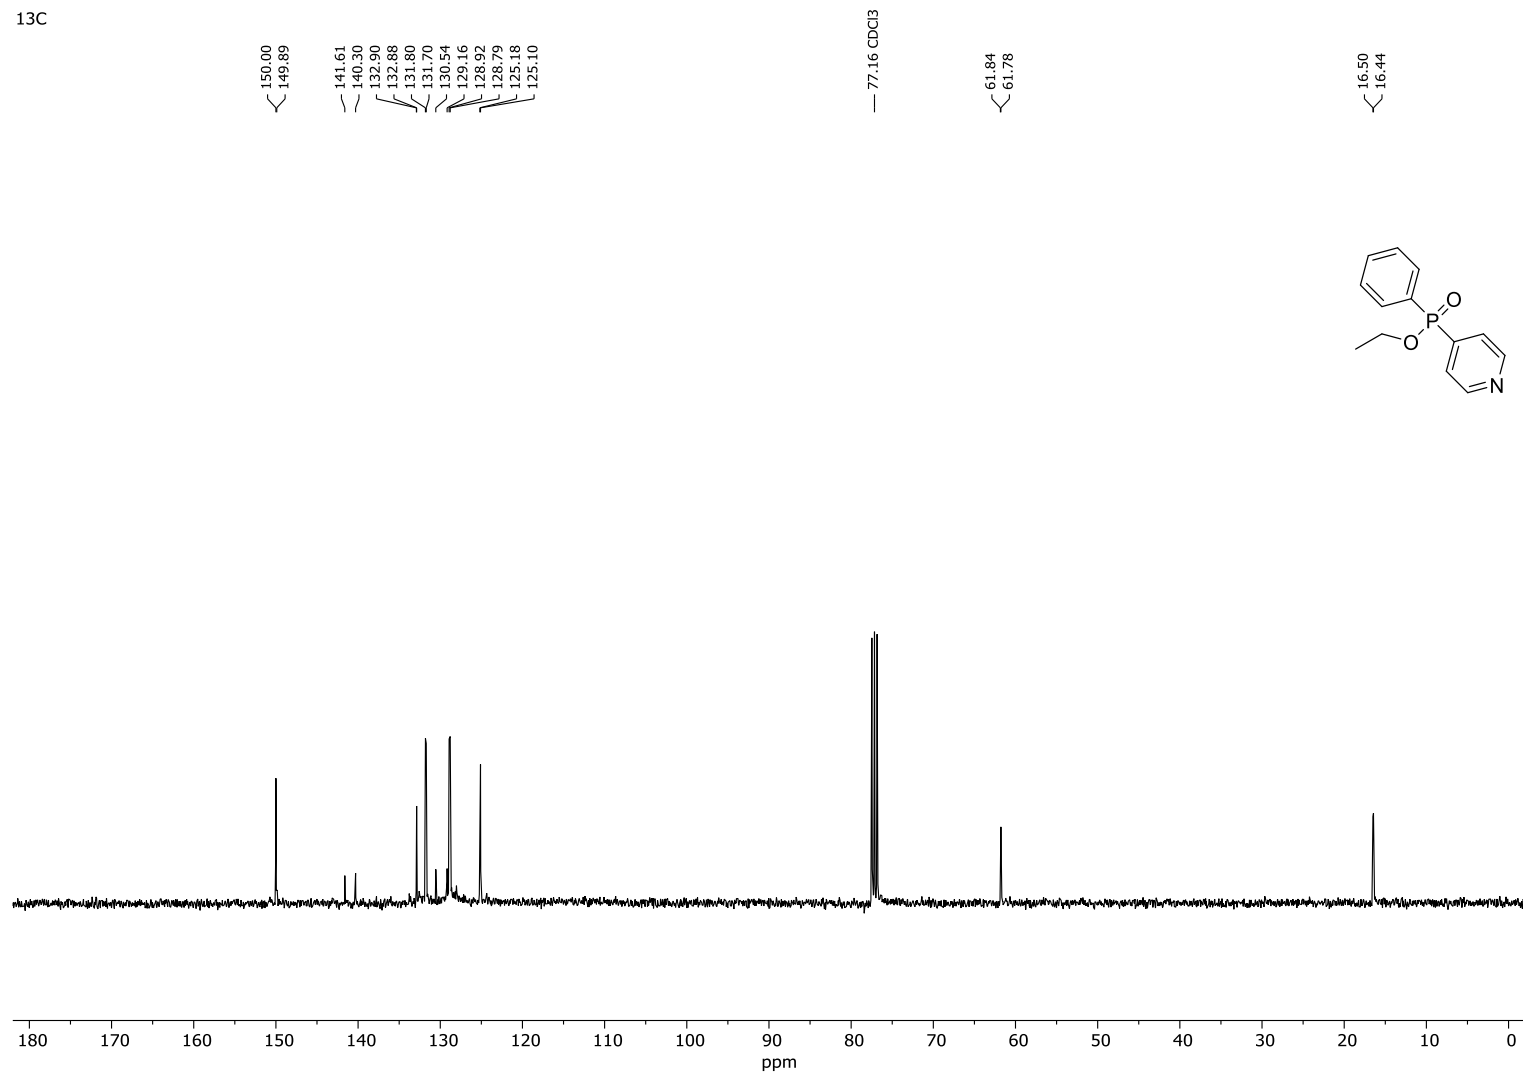

# Ethyl phenyl(pyridin-4-yl)phosphinate (3aa)

1H-15N HMBC

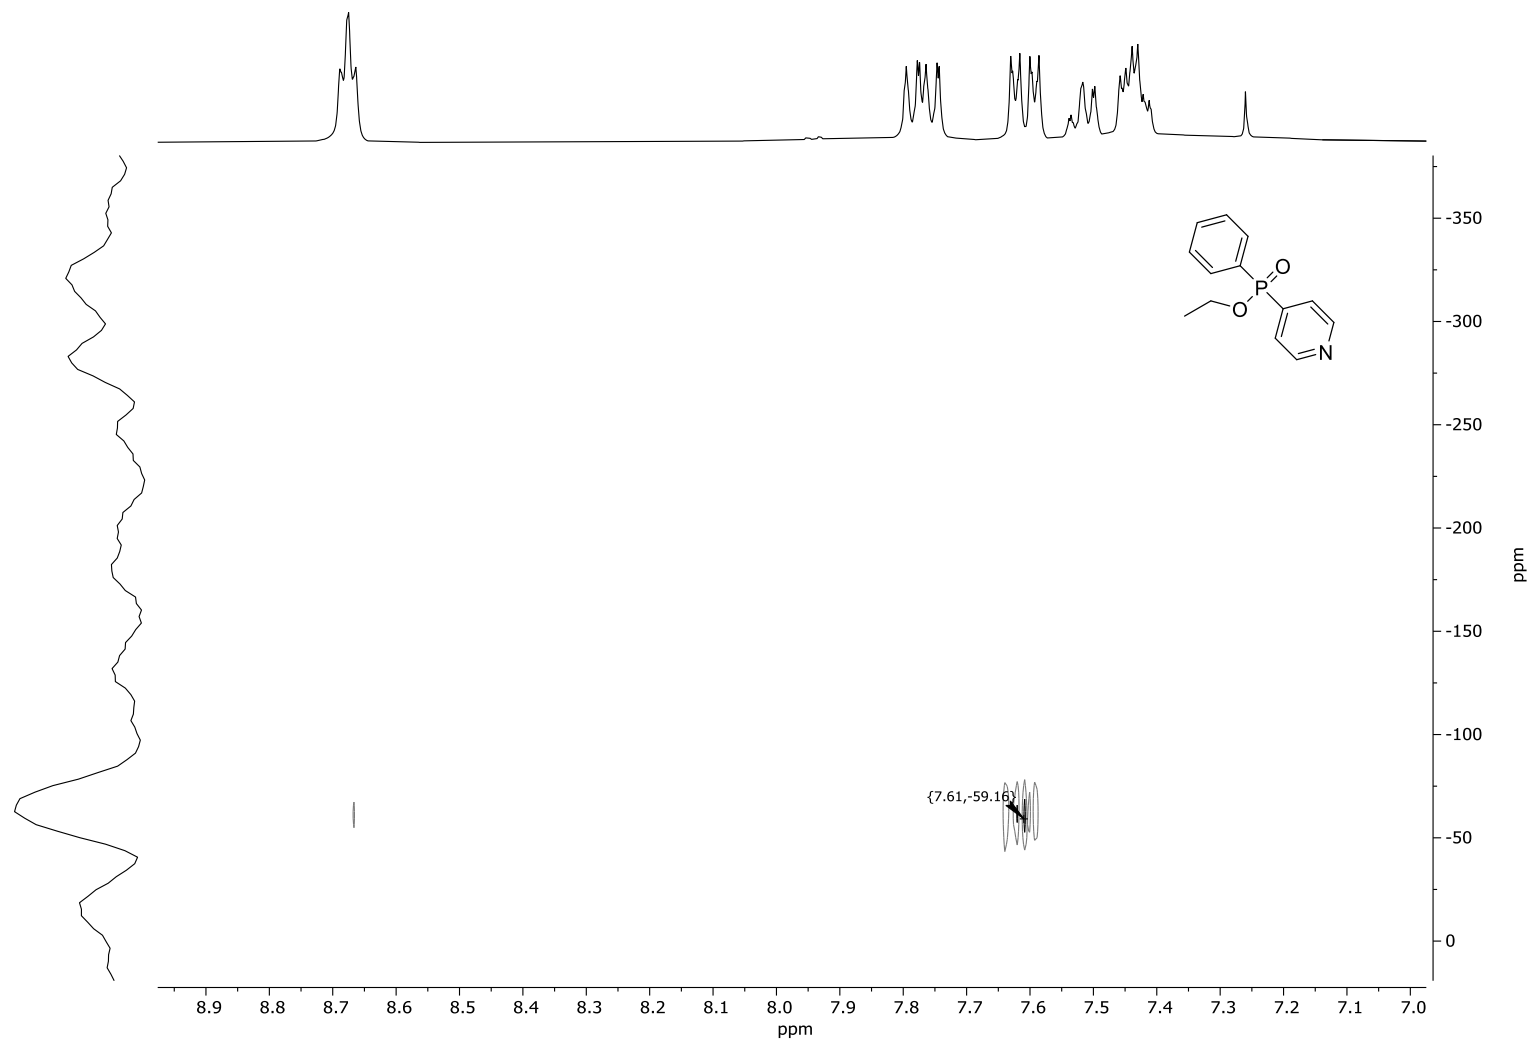

# Ethyl phenyl(pyridin-4-yl)phosphinate (3aa)

31P

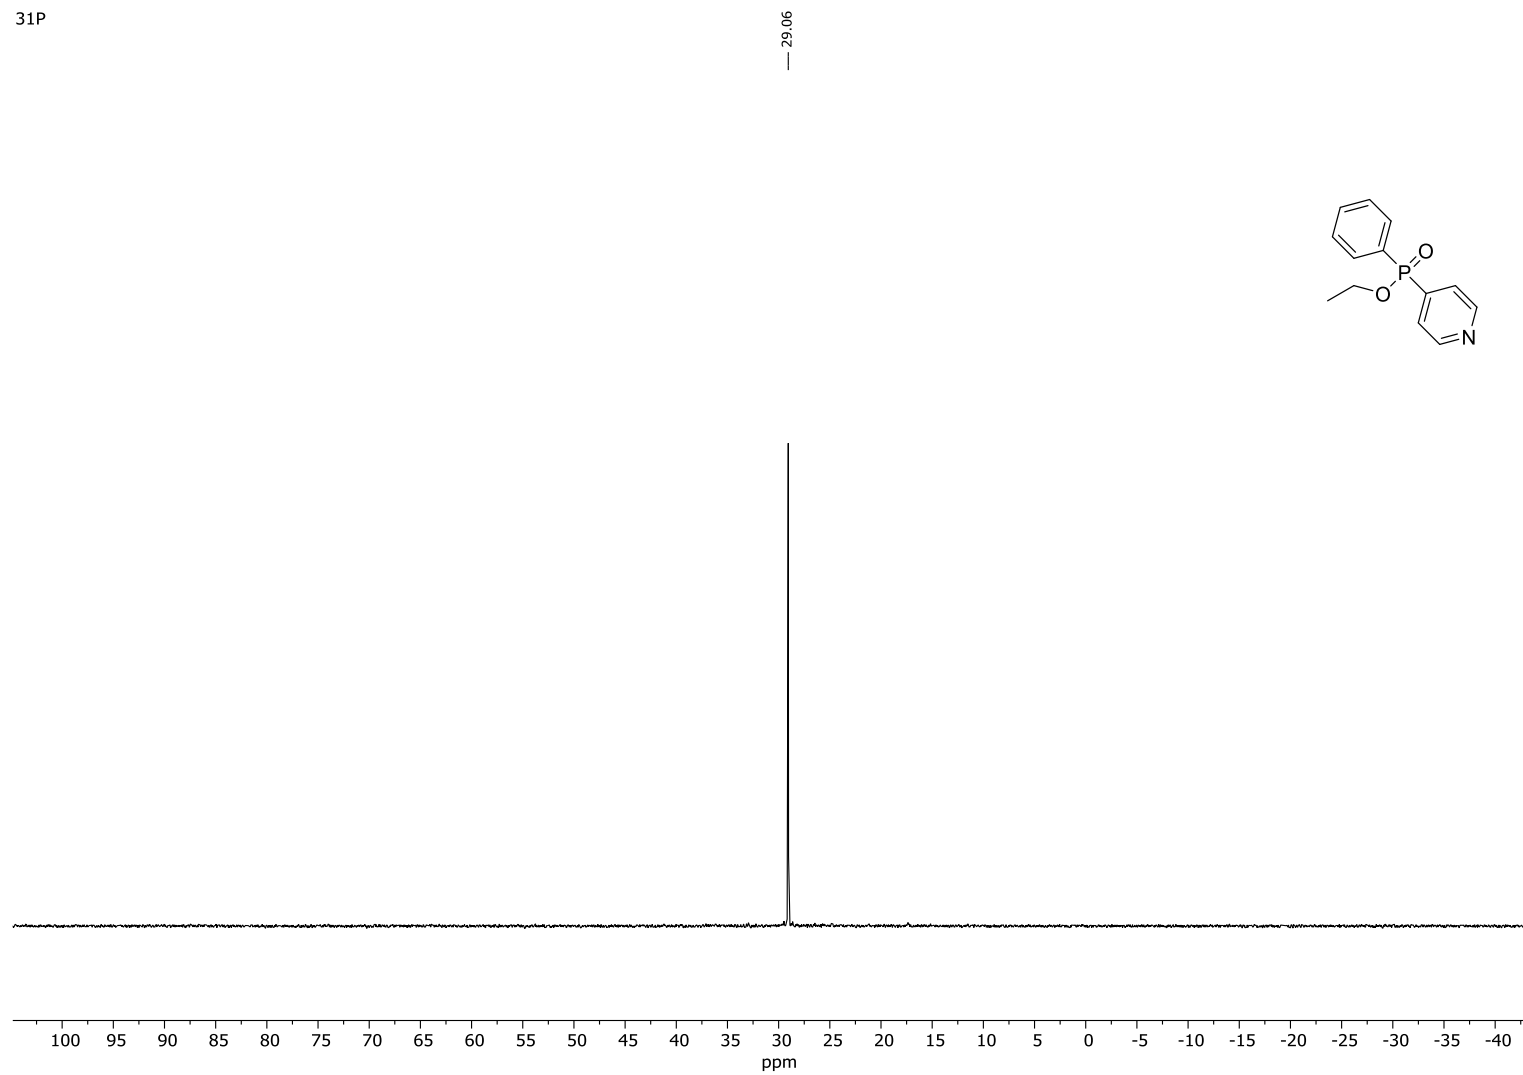

# Ethyl (3-methylpyridin-4-yl)phenylphosphinate (3ba)

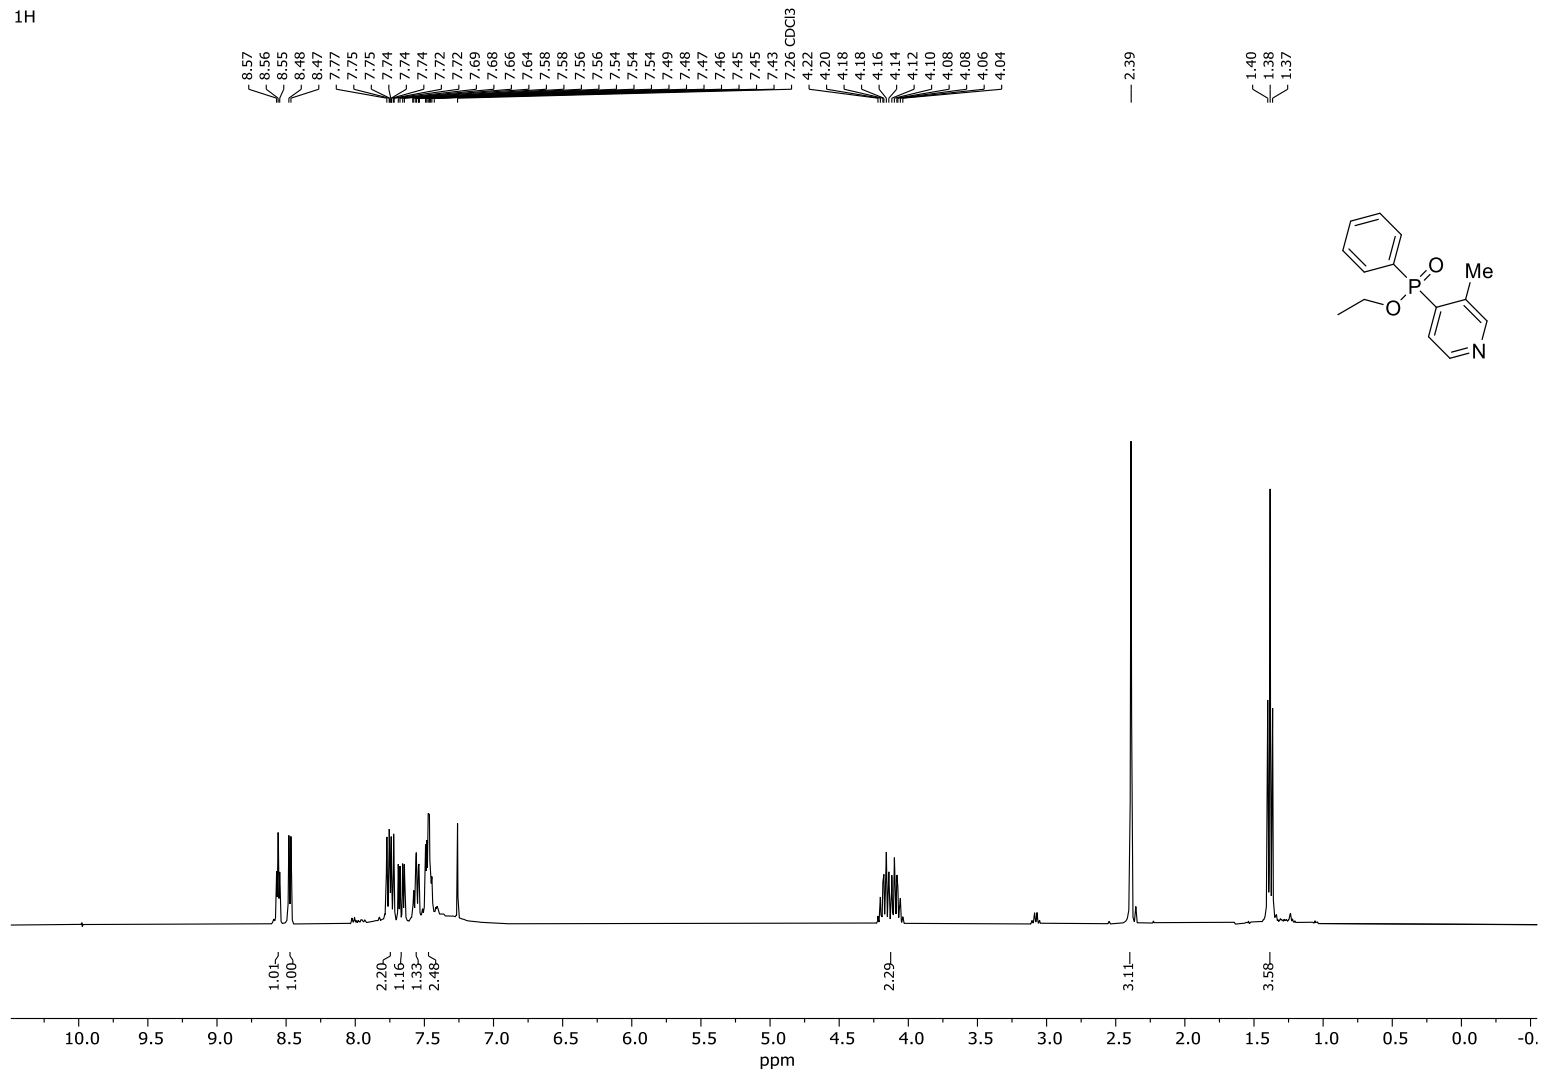

# Ethyl (3-methylpyridin-4-yl)phenylphosphinate (3ba)

<sup>13</sup>C

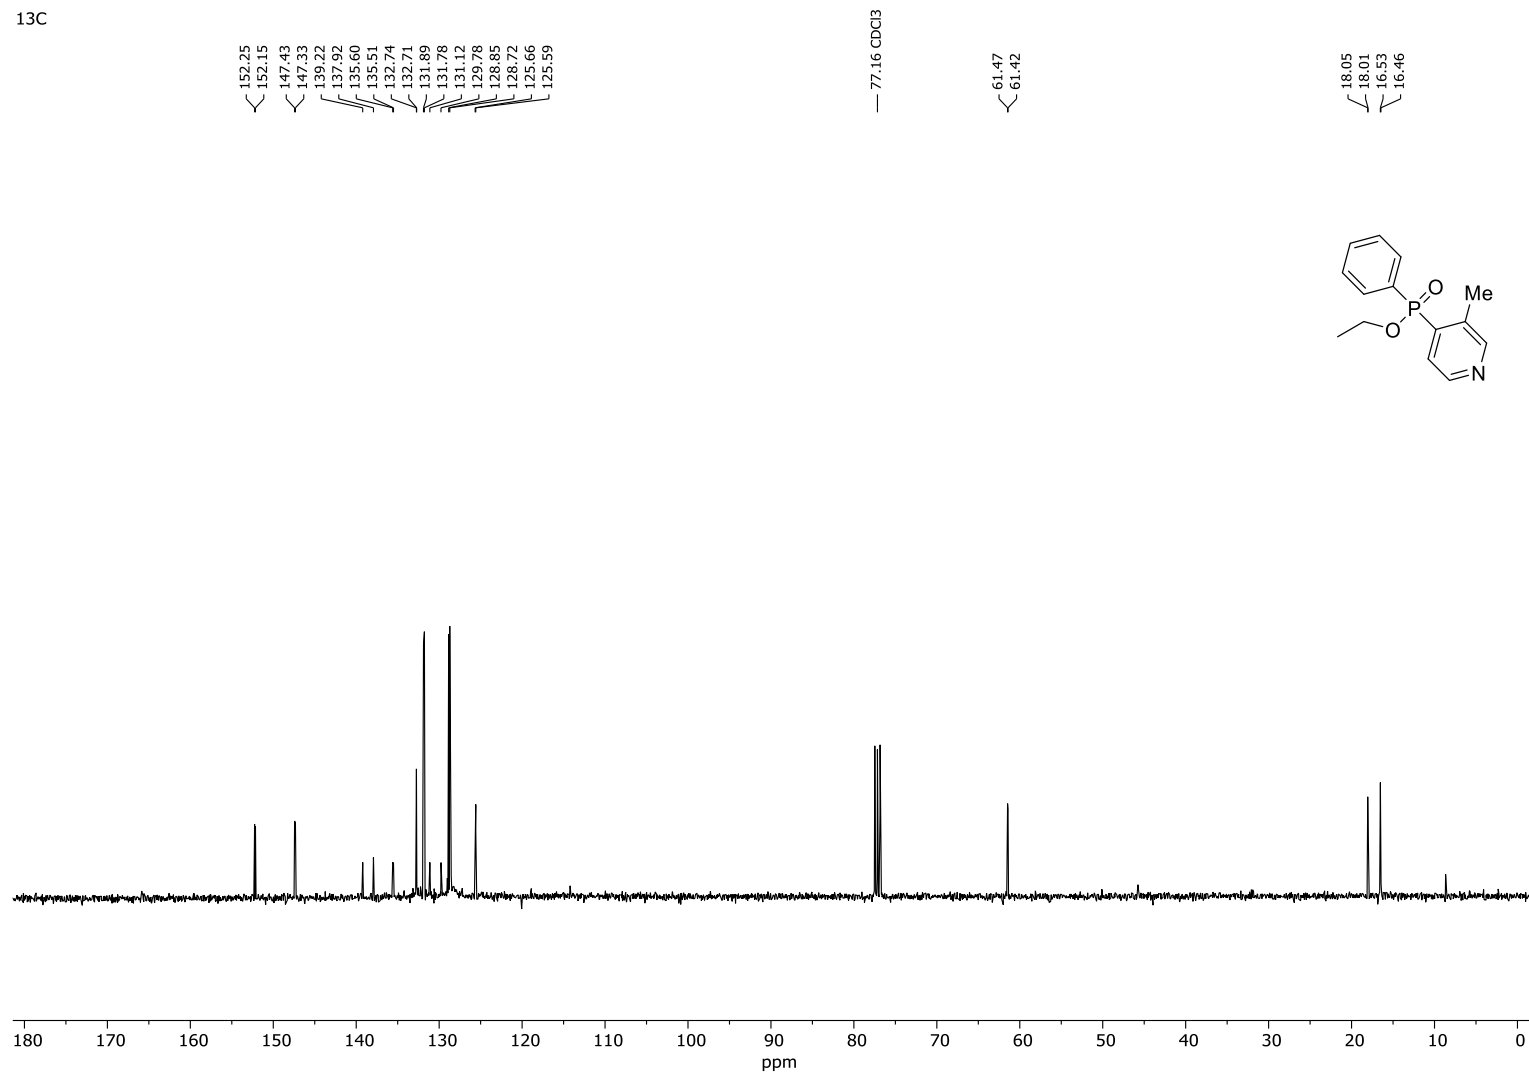

**Ethyl (3-methylpyridin-4-yl)phenylphosphinate (3ba)**

31P

— 29.65

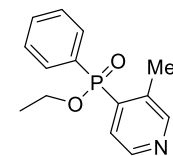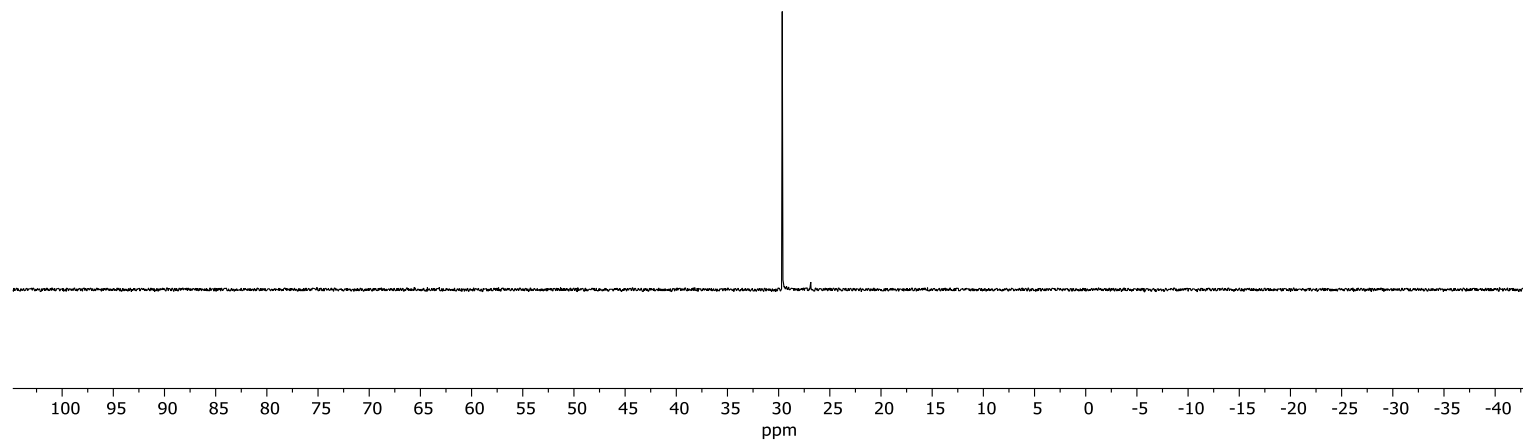



# Ethyl (3-fluoropyridin-4-yl)phenylphosphinate (3ca)

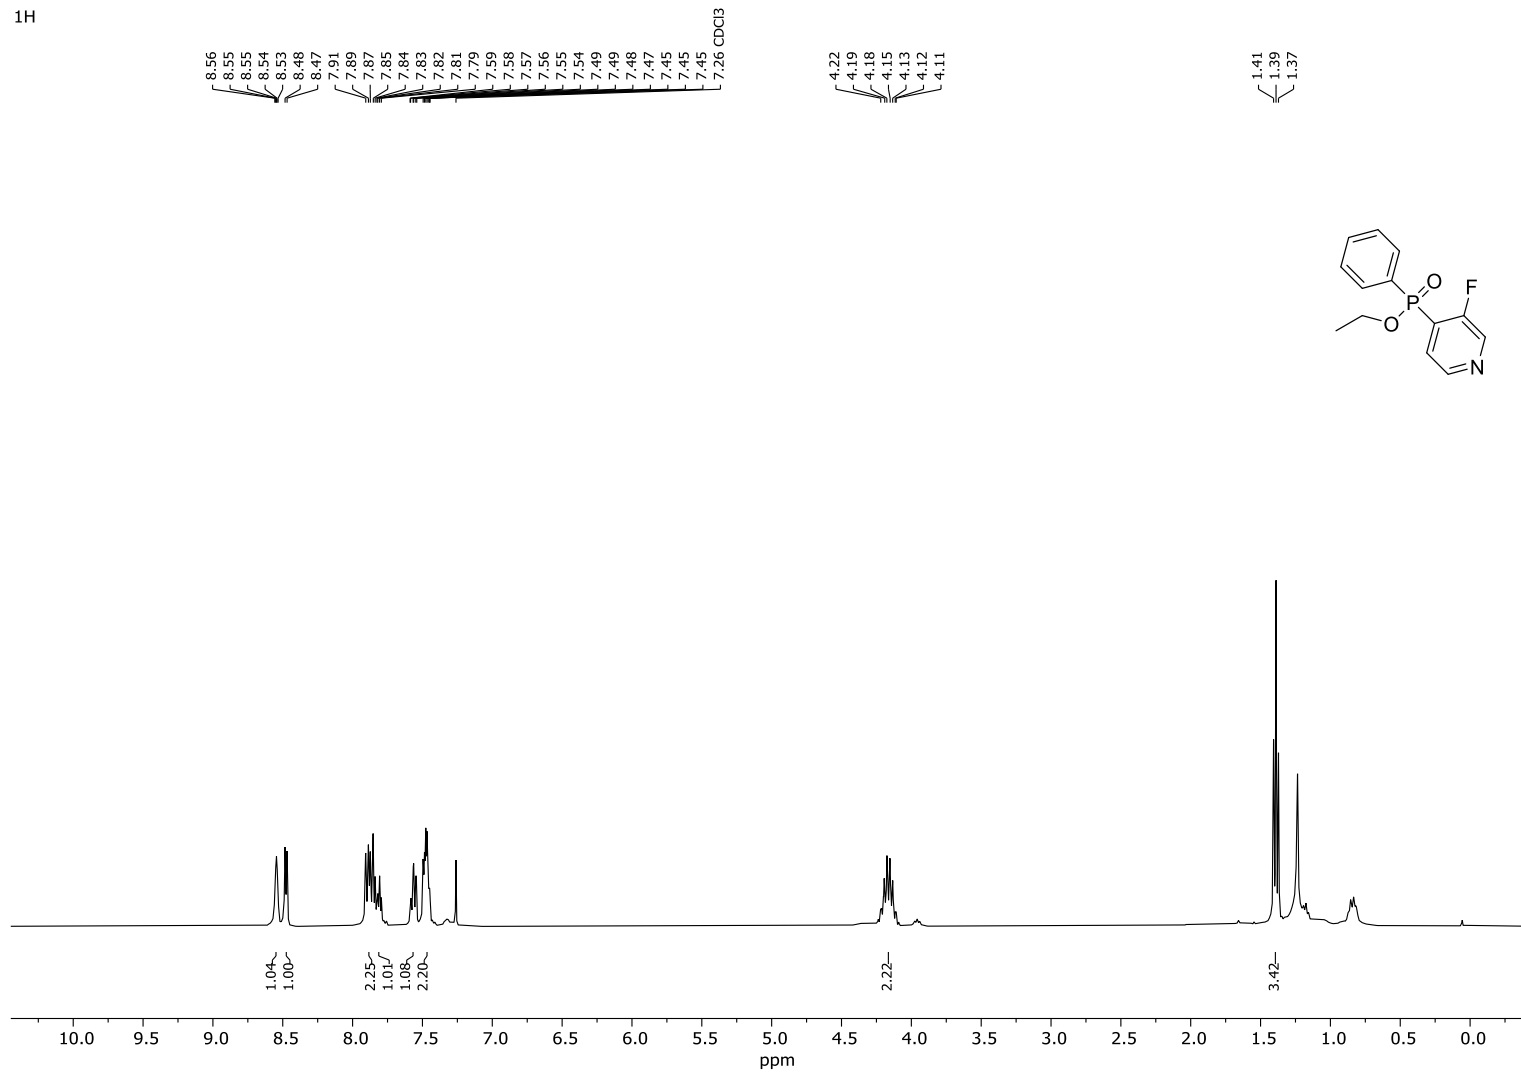

# Ethyl (3-fluoropyridin-4-yl)phenylphosphinate (3ca)

13C

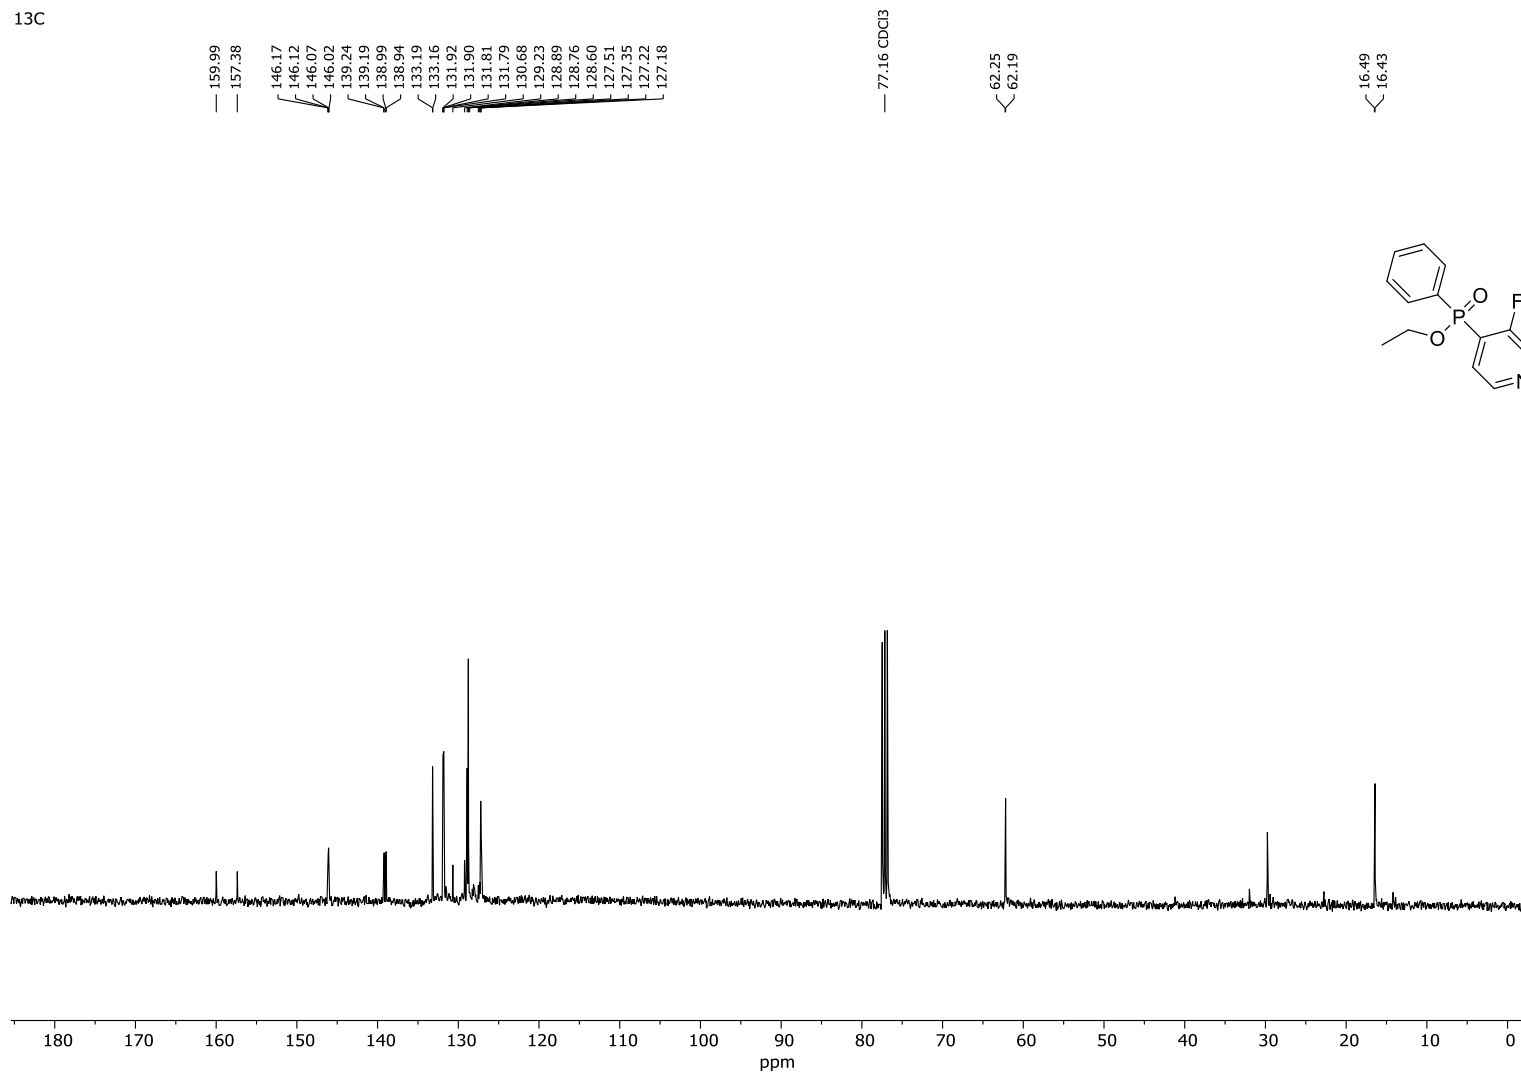

# Ethyl (3-fluoropyridin-4-yl)phenylphosphinate (3ca)

<sup>1</sup>H-<sup>15</sup>N HMBC

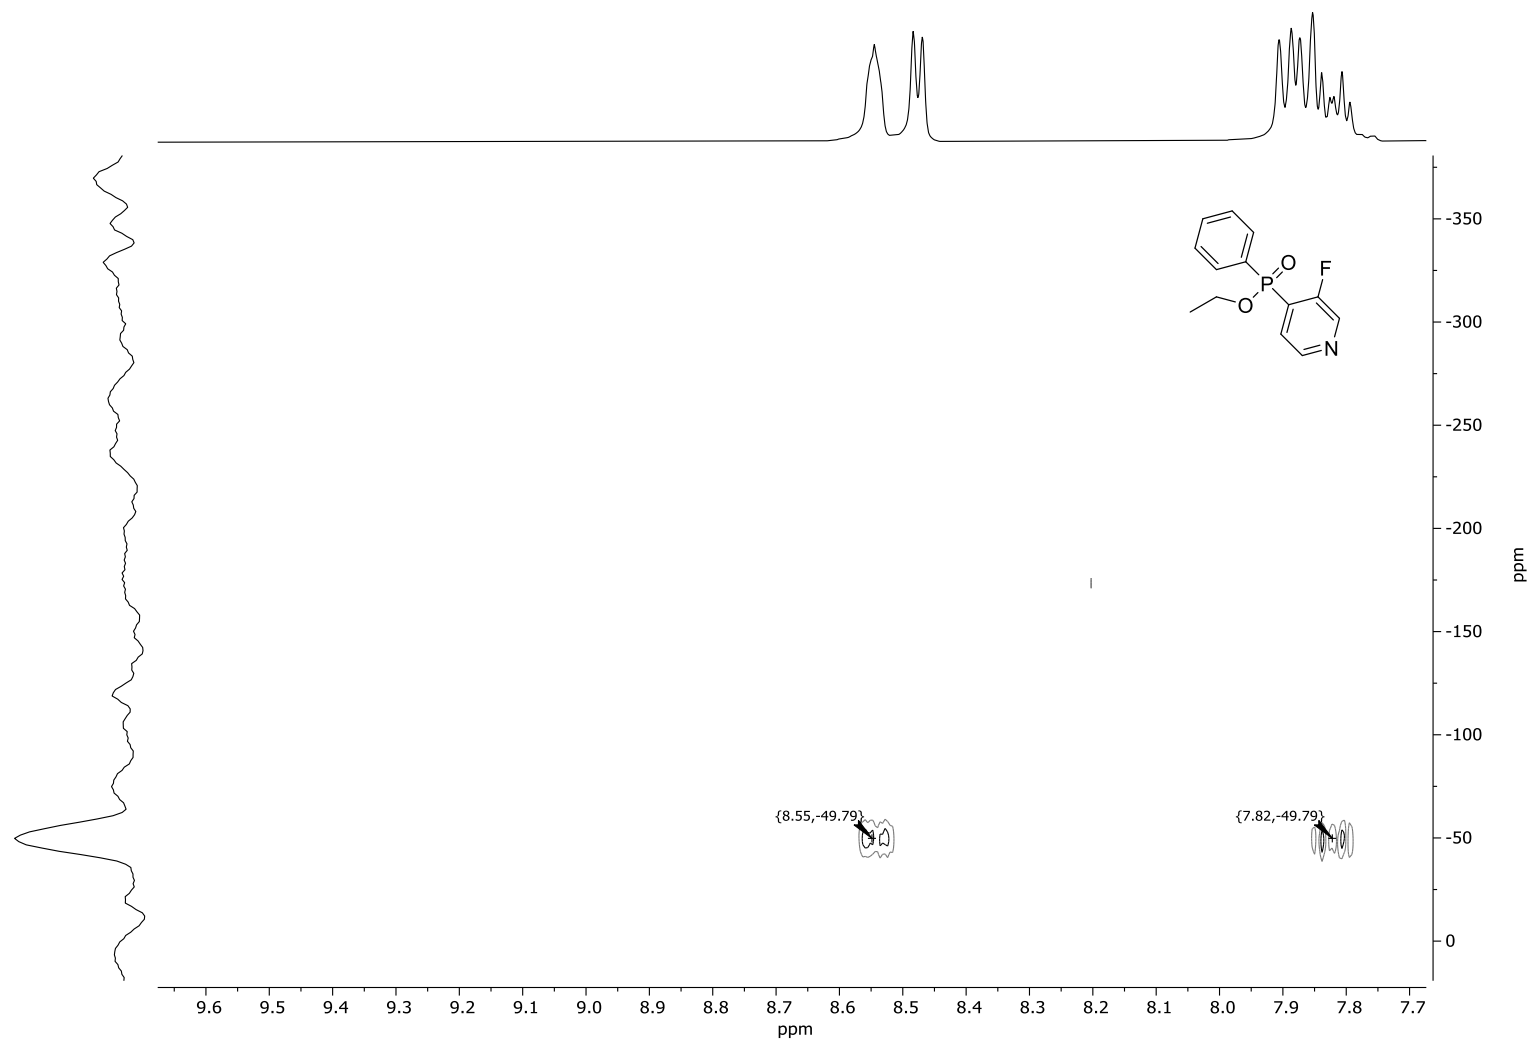

# Ethyl (3-fluoropyridin-4-yl)phenylphosphinate (3ca)

19F

-117.88

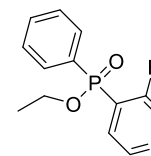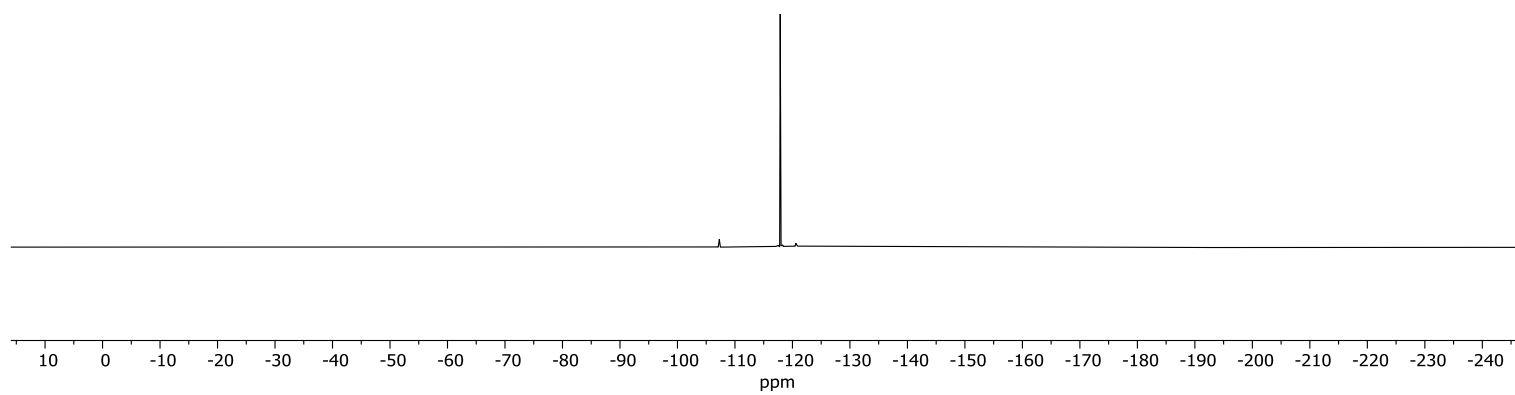

**Ethyl (3-fluoropyridin-4-yl)phenylphosphinate (3ca)**

31P

— 24.46

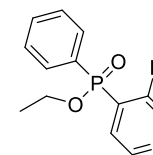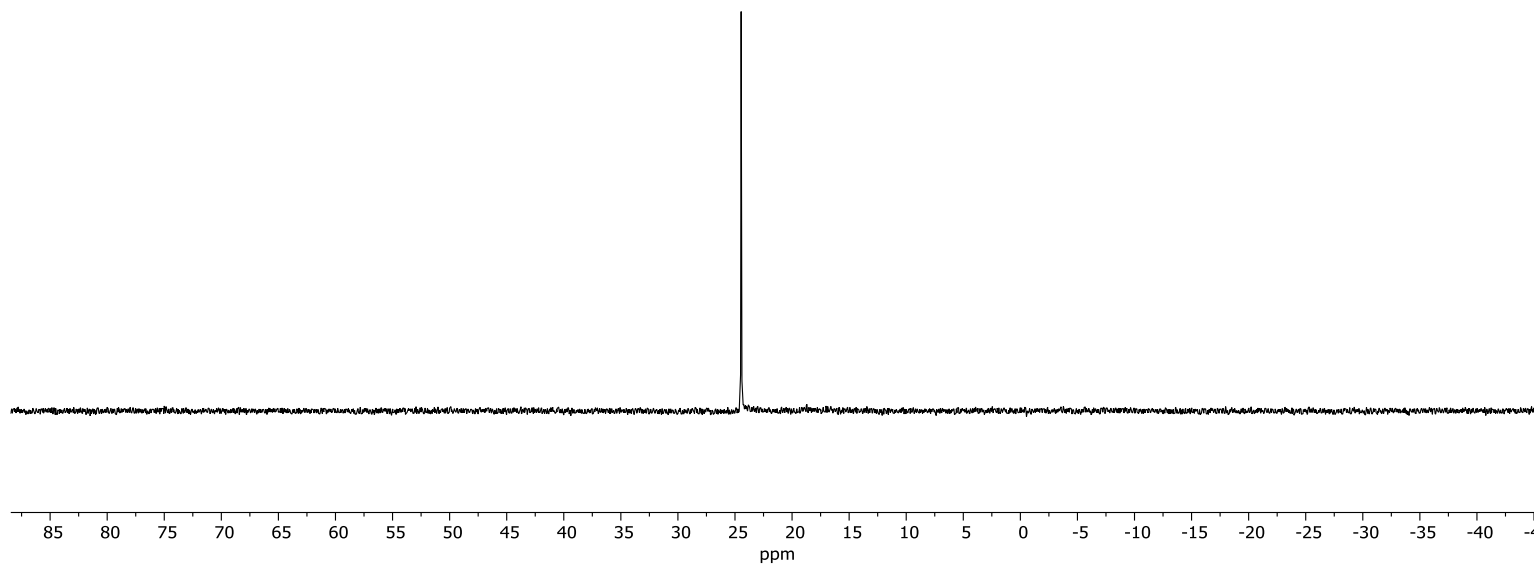

# Ethyl (3-chloropyridin-4-yl)phenylphosphinate (3da)

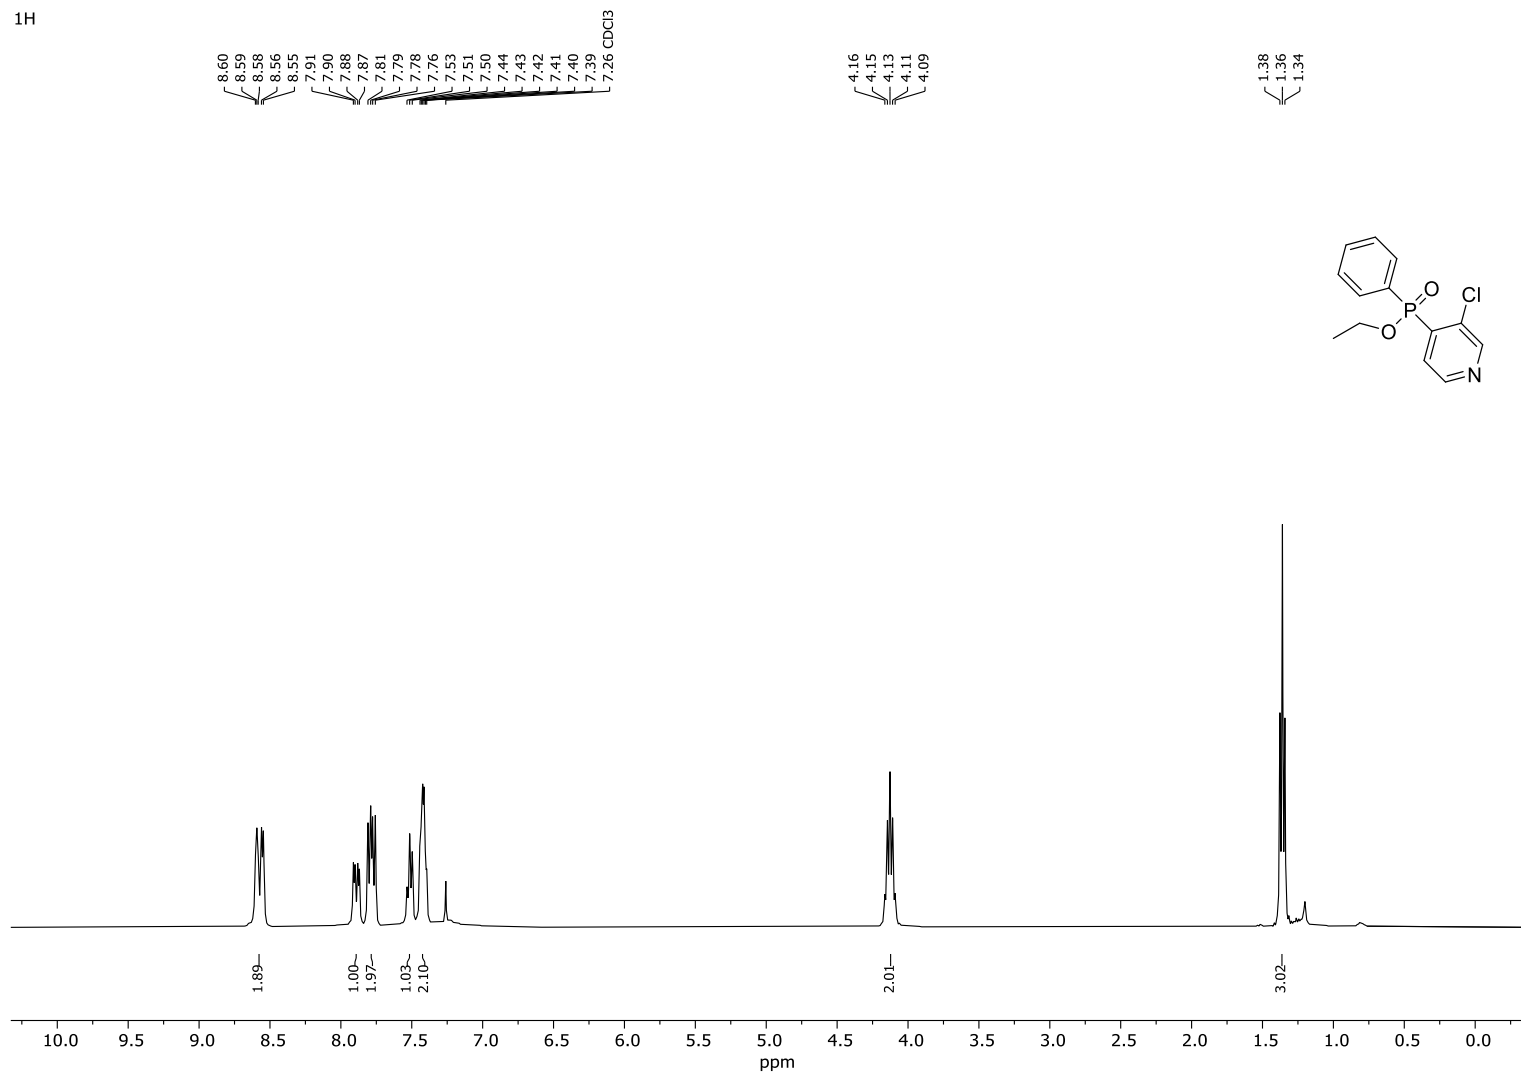

# Ethyl (3-chloropyridin-4-yl)phenylphosphinate (3da)

<sup>13</sup>C

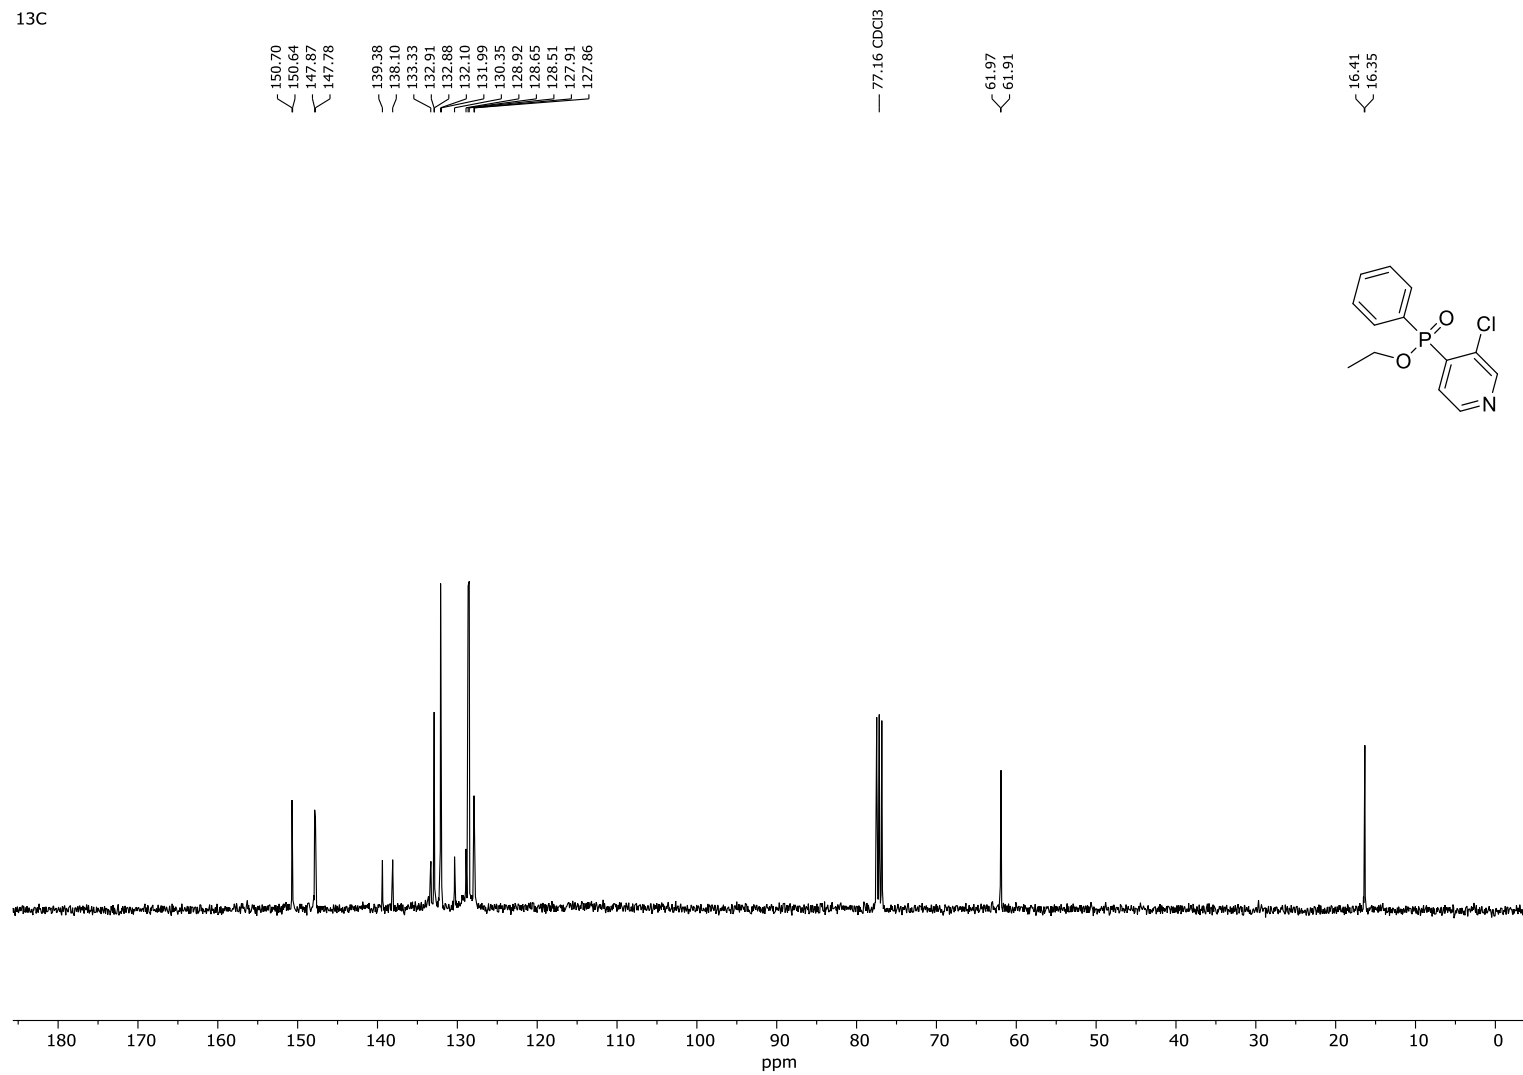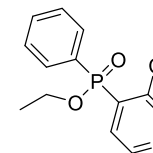

# Ethyl (3-chloropyridin-4-yl)phenylphosphinate (3da)

31P

— 25.75

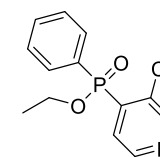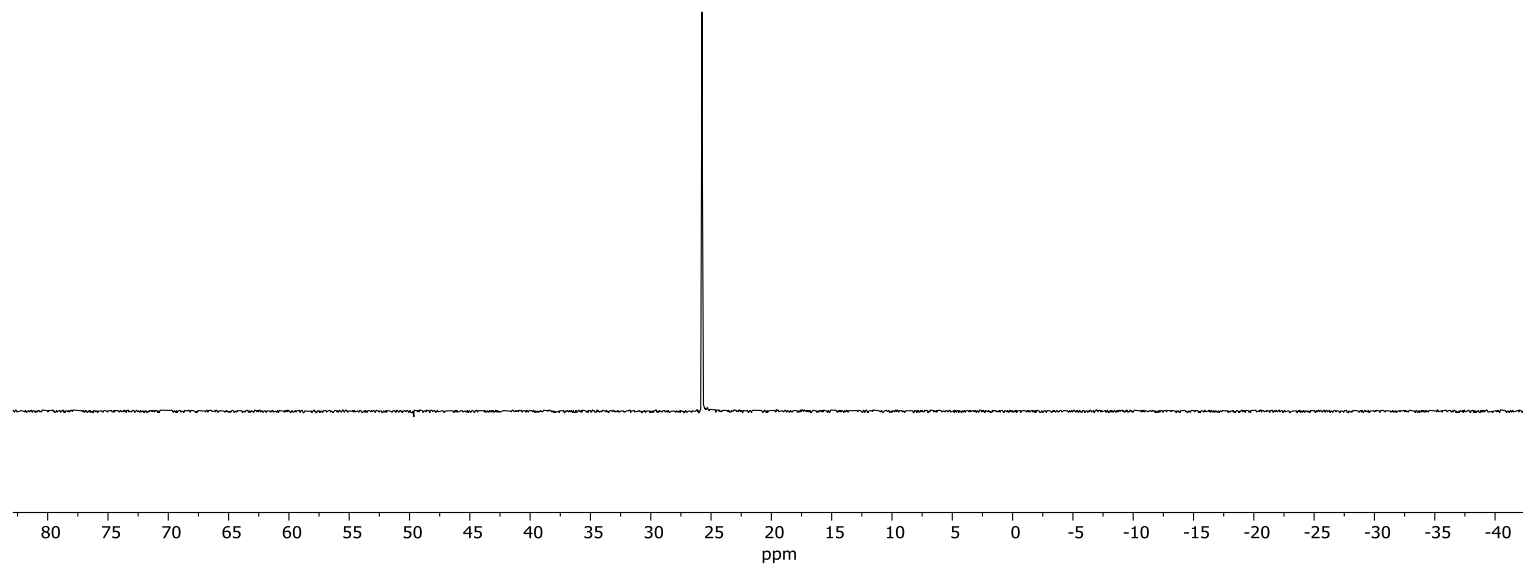



# Butyl phenyl(pyridin-4-yl)phosphinate (3ab)

<sup>1</sup>H

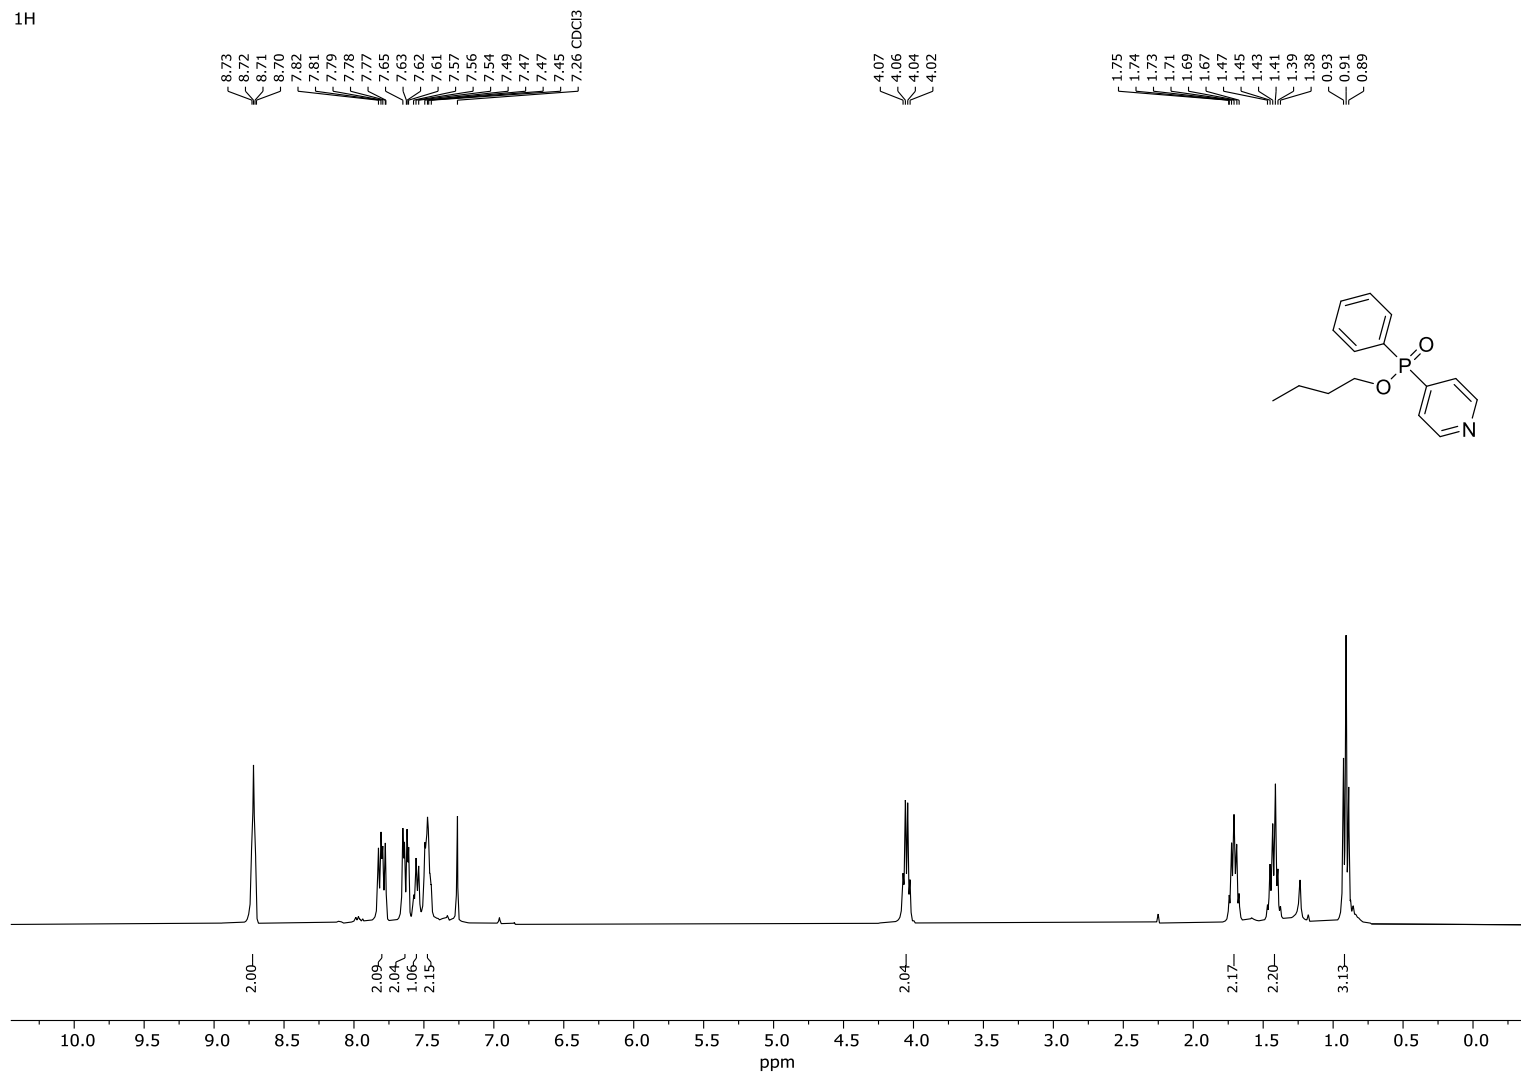

# Butyl phenyl(pyridin-4-yl)phosphinate (3ab)

<sup>13</sup>C

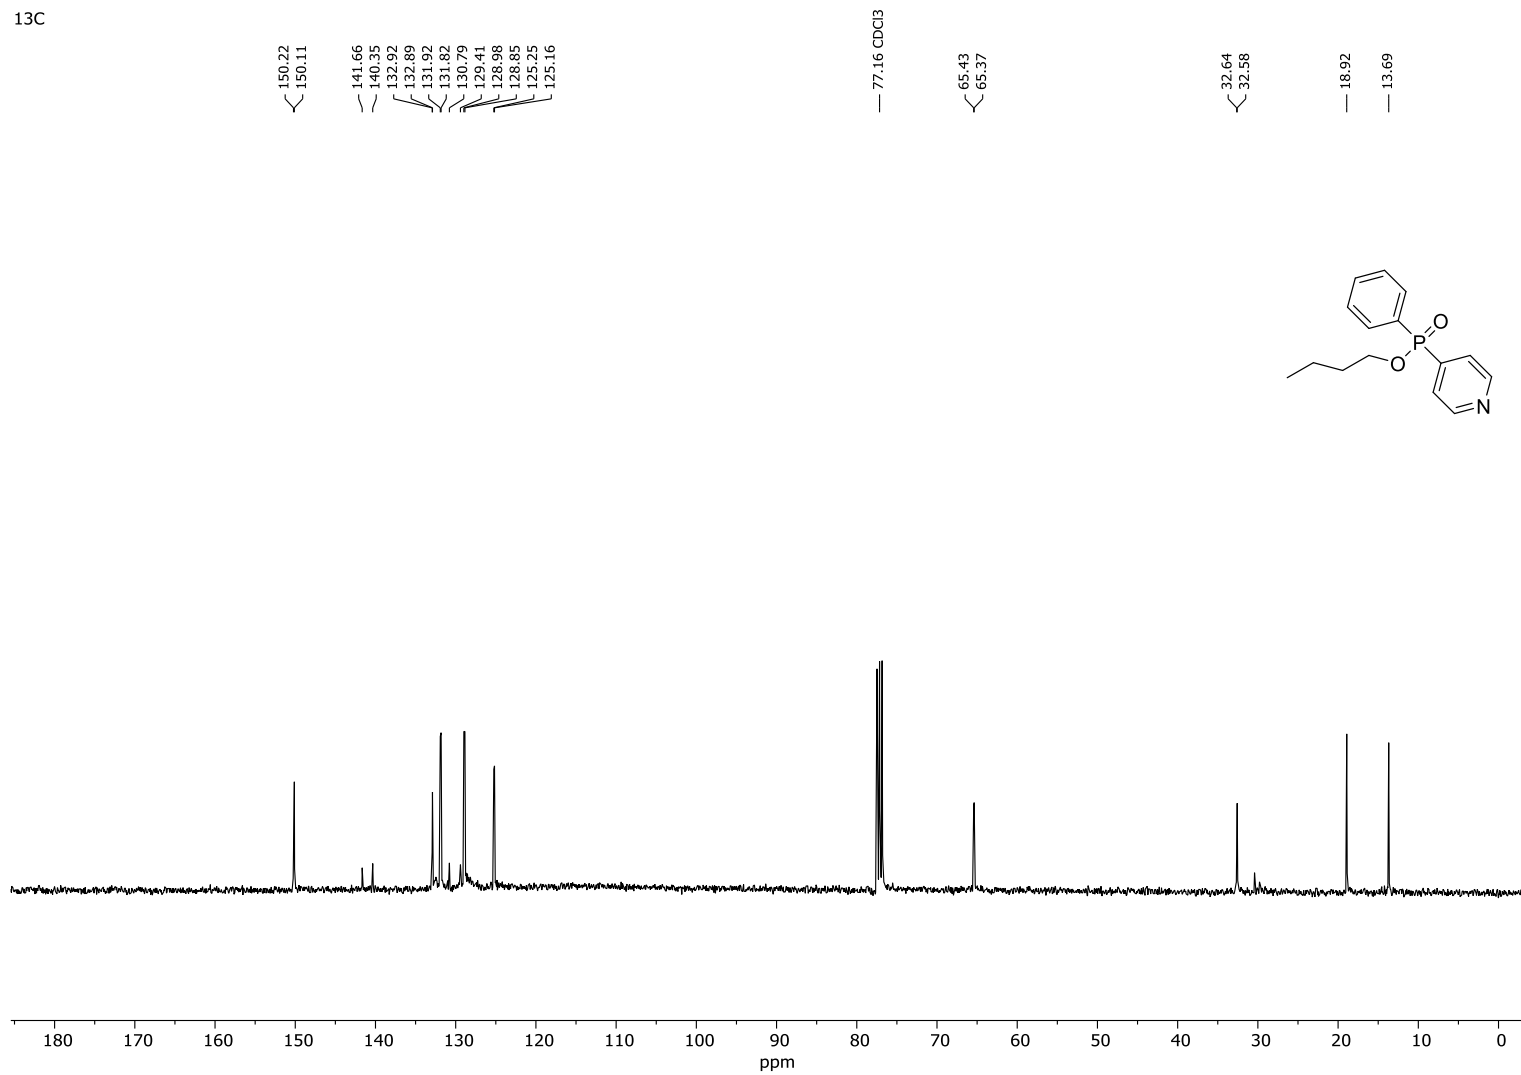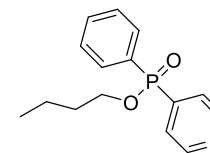

**Butyl phenyl(pyridin-4-yl)phosphinate (3ab)**

31P

28.82

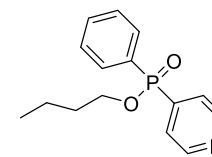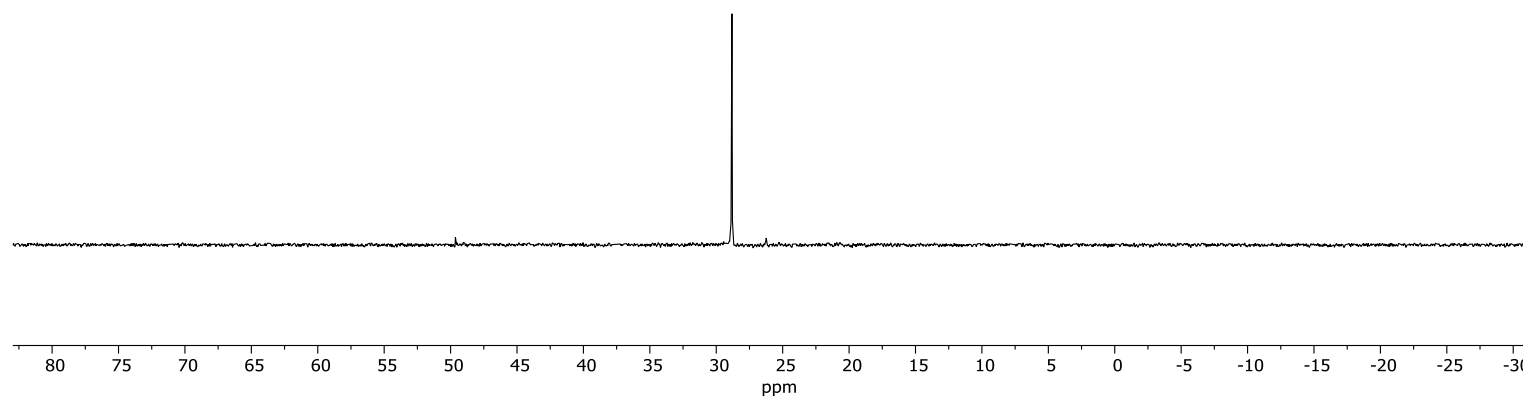

# Butyl (3-methylpyridin-4-yl)phenylphosphinate (3bb)

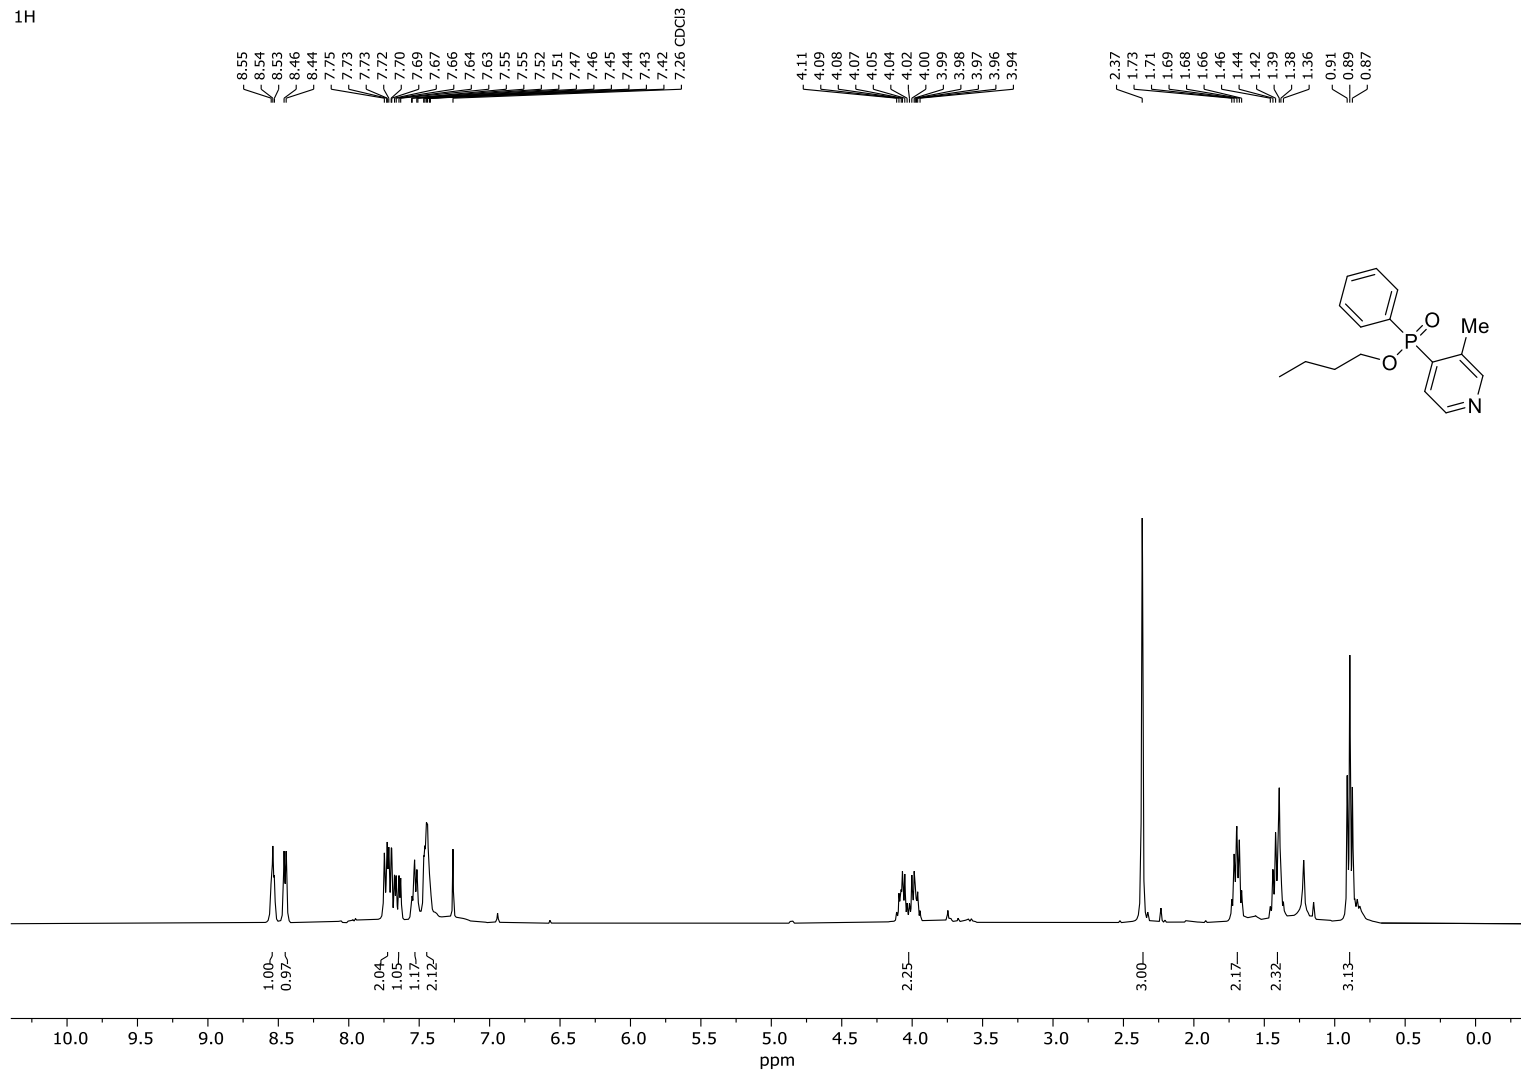

# Butyl (3-methylpyridin-4-yl)phenylphosphinate (3bb)

<sup>13</sup>C

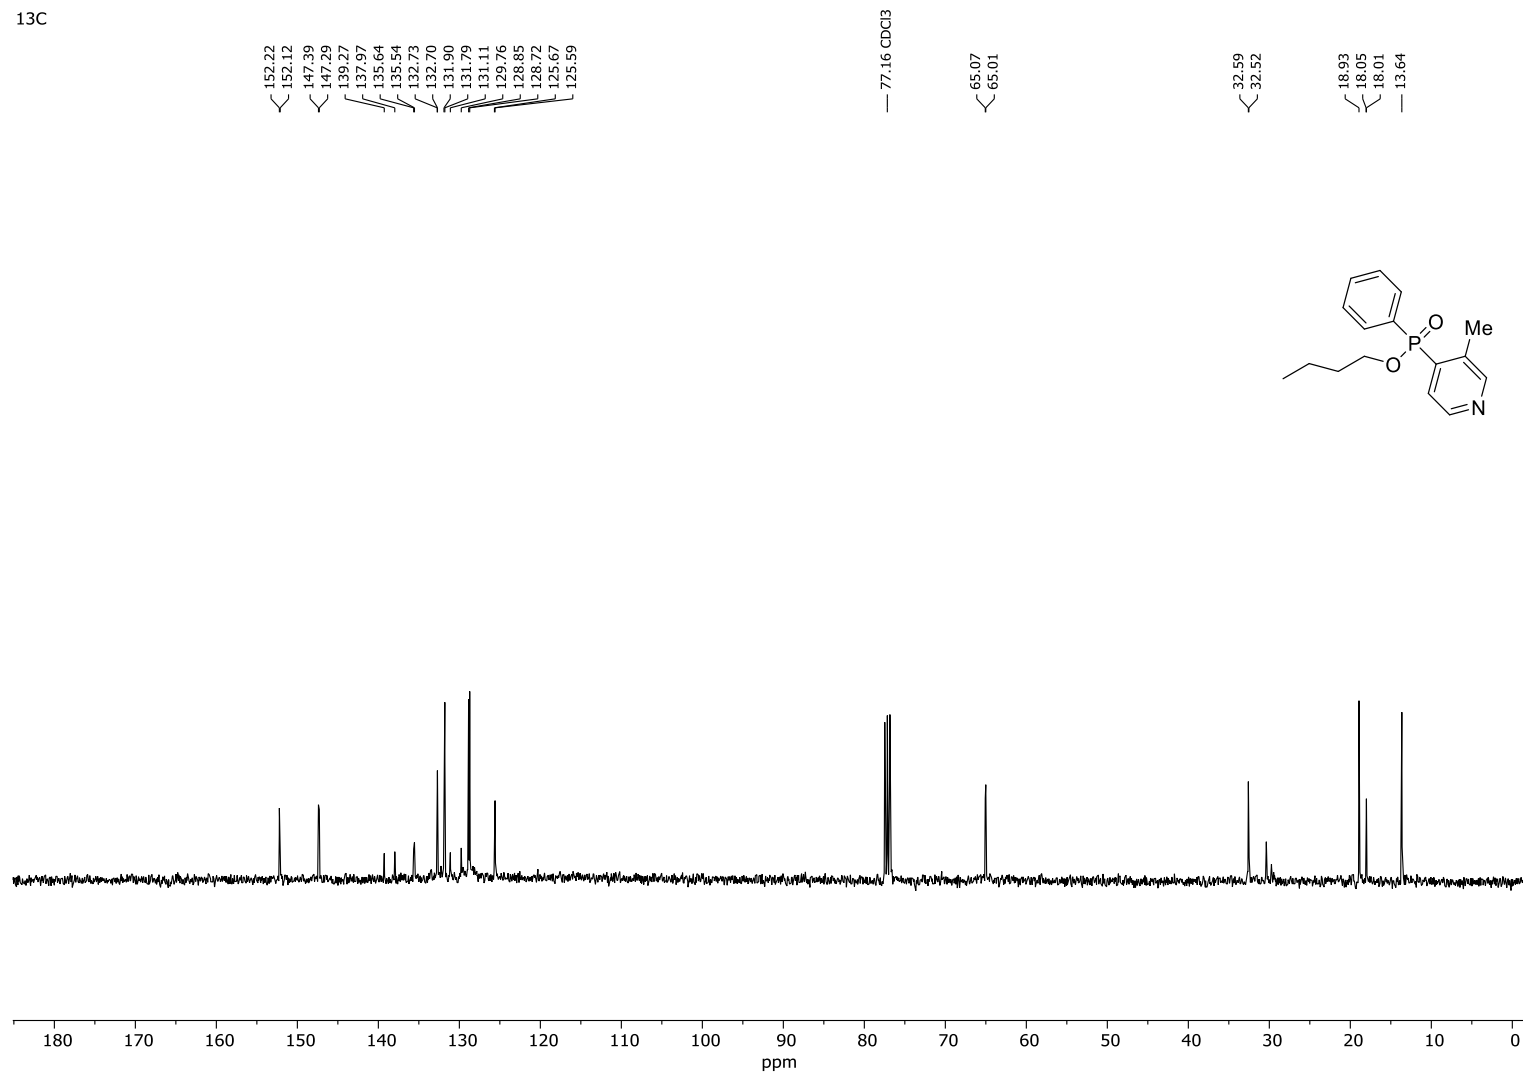

**Butyl (3-methylpyridin-4-yl)phenylphosphinate (3bb)**

31P

— 29.44

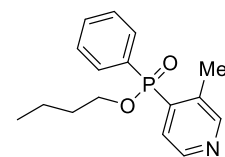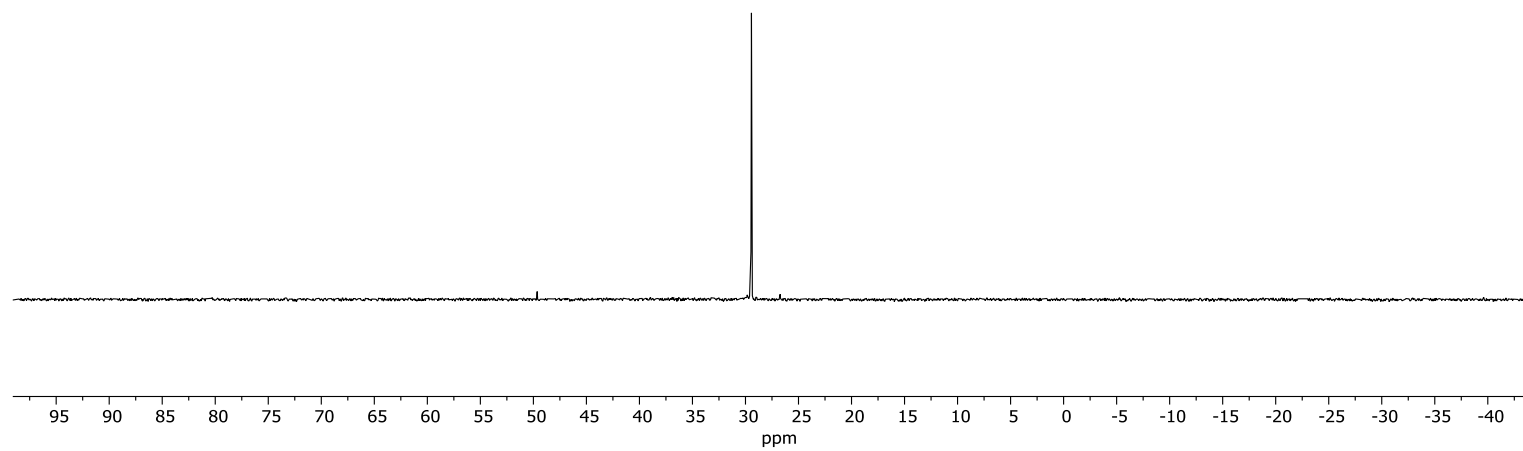

# Butyl (3-fluoropyridin-4-yl)phenylphosphinate (3cb)

<sup>1</sup>H

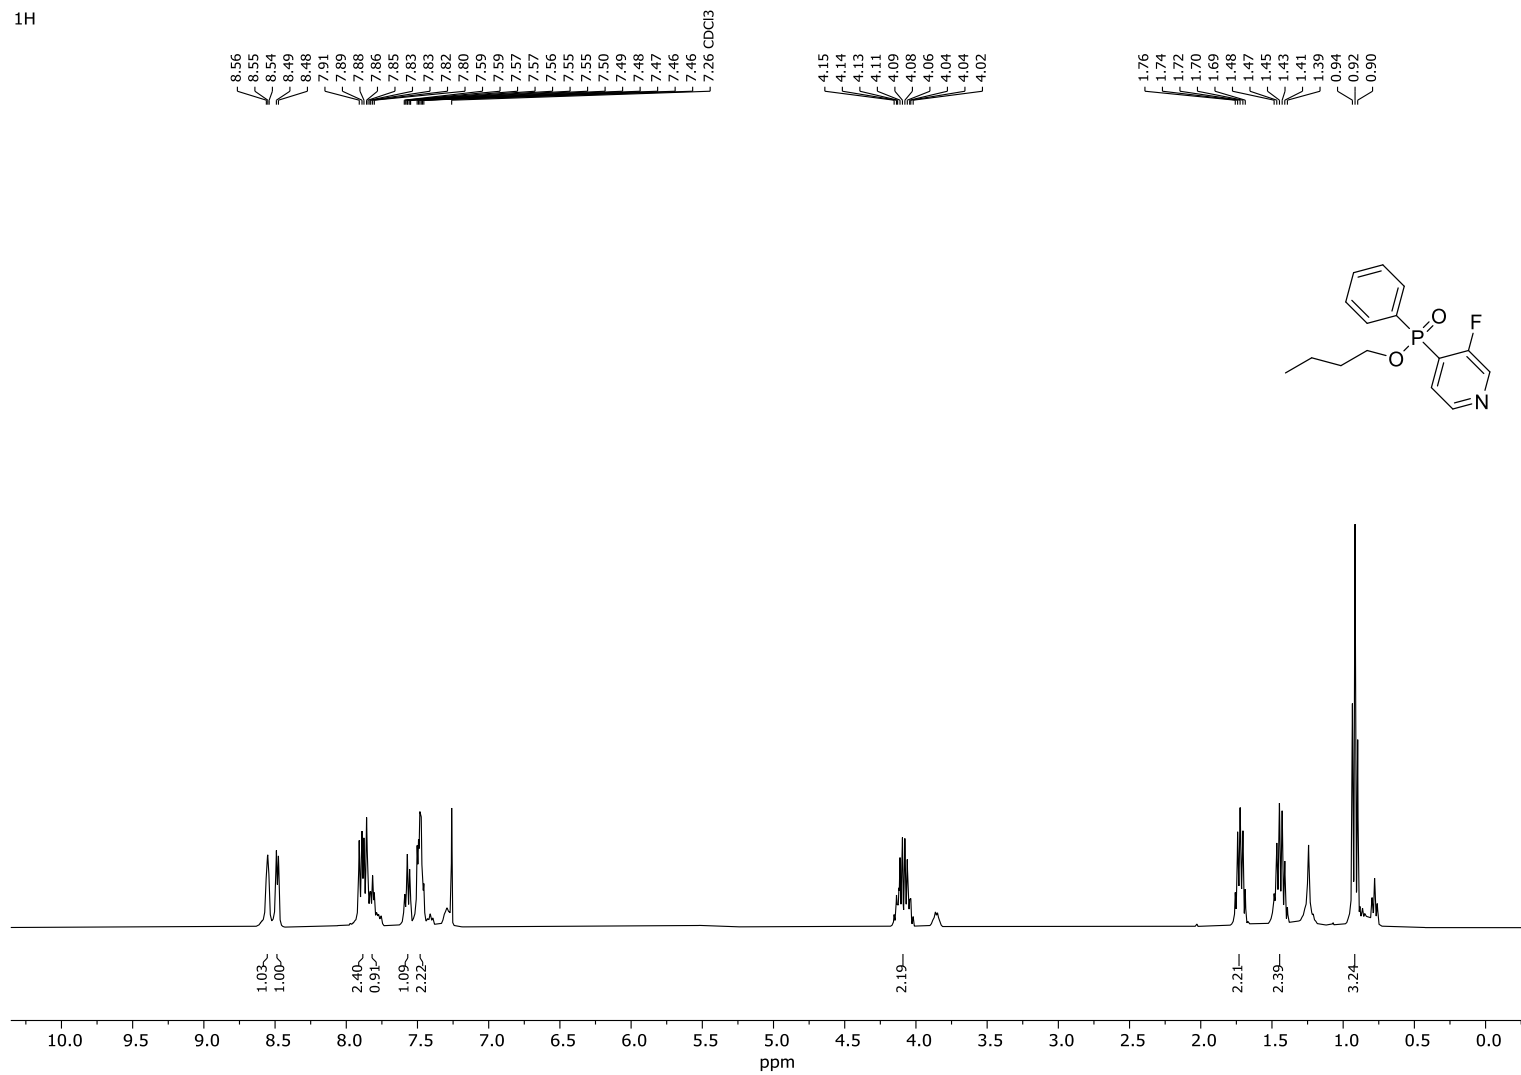

# Butyl (3-fluoropyridin-4-yl)phenylphosphinate (3cb)

<sup>13</sup>C

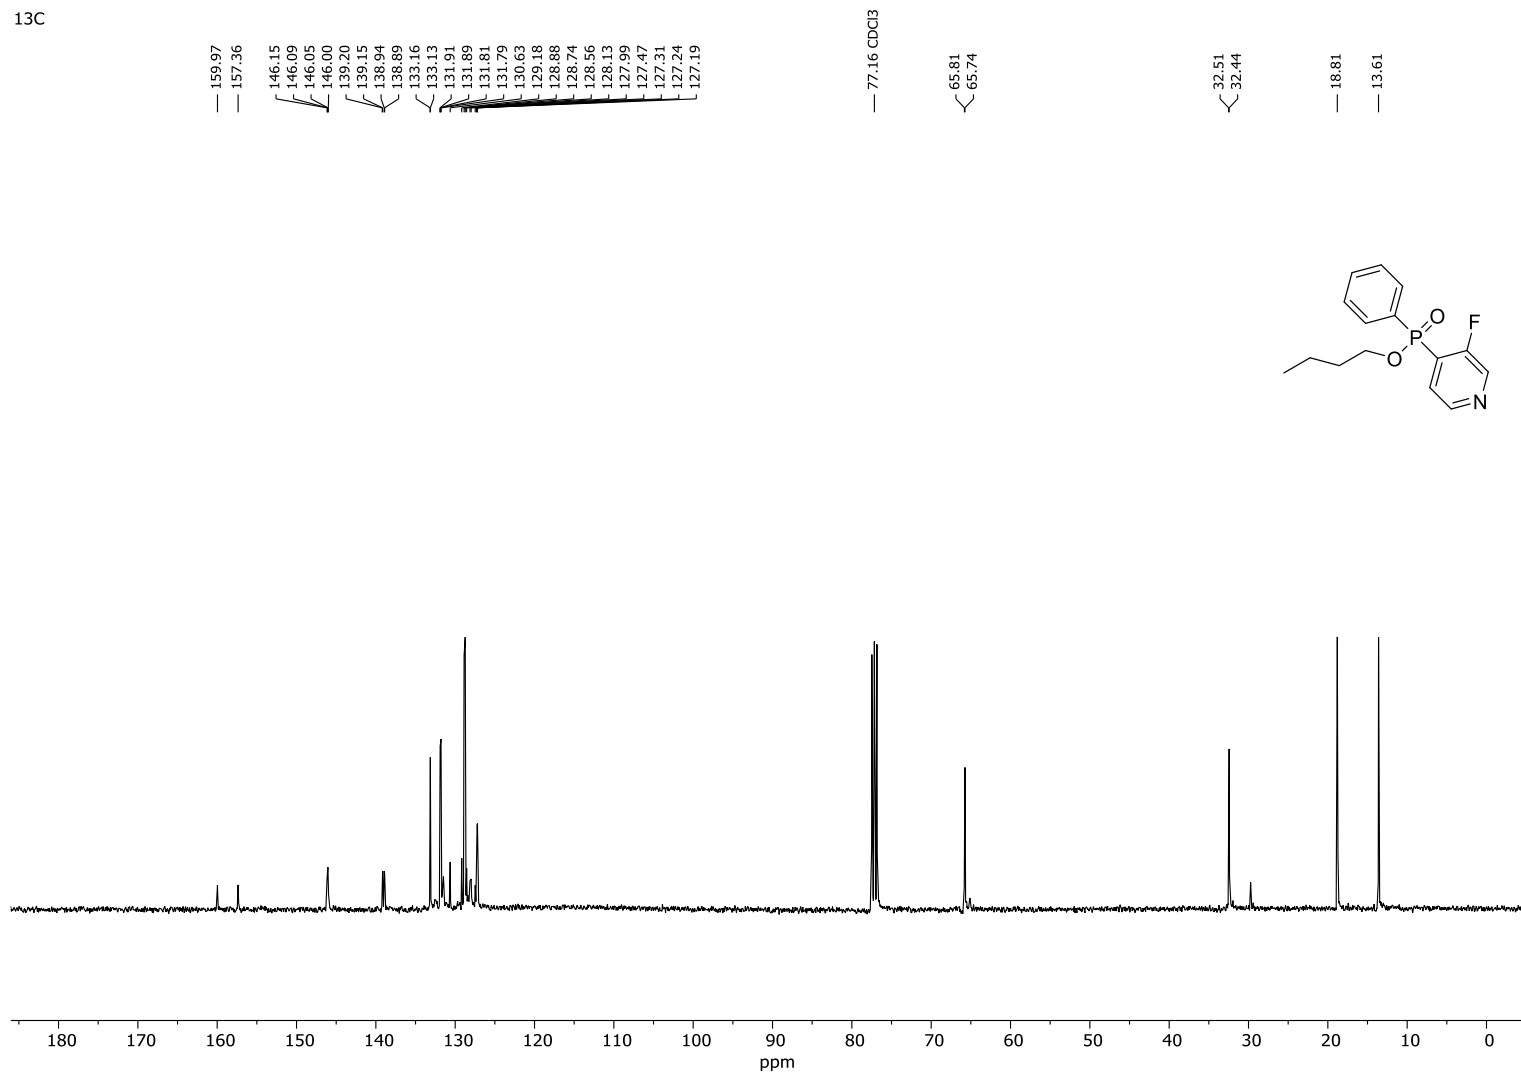



# Butyl (3-fluoropyridin-4-yl)phenylphosphinate (3cb)

1H-15N HMBC

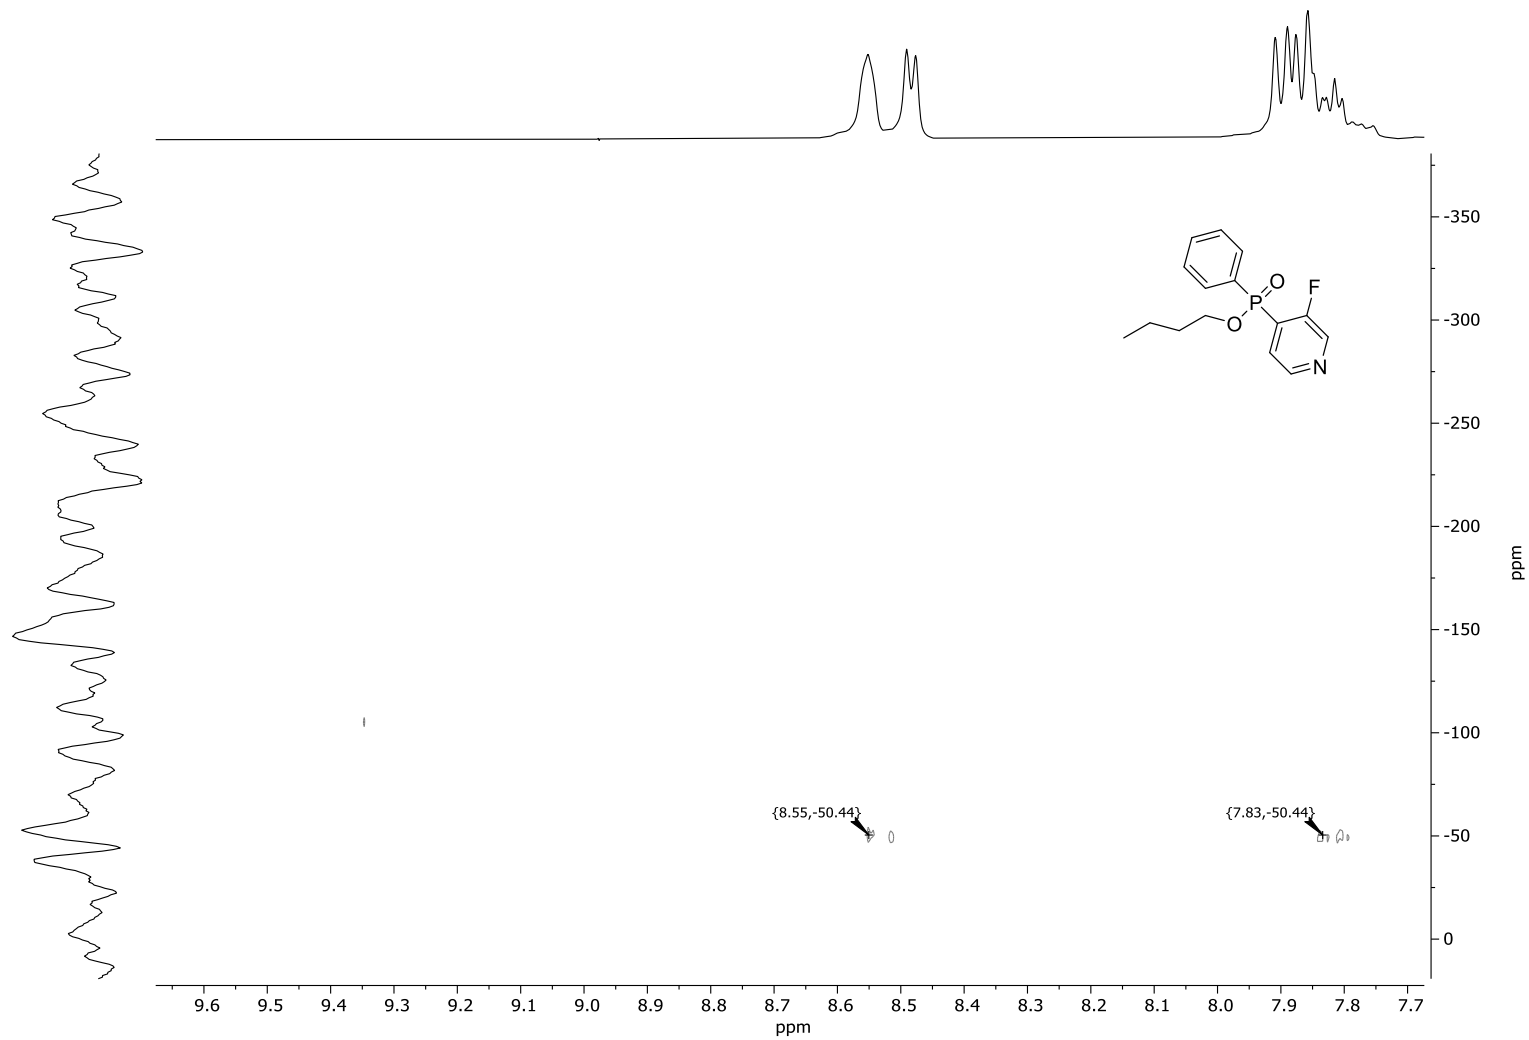

**Butyl (3-fluoropyridin-4-yl)phenylphosphinate (3cb)**

19F

-117.84

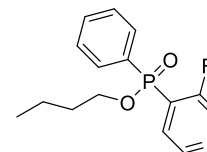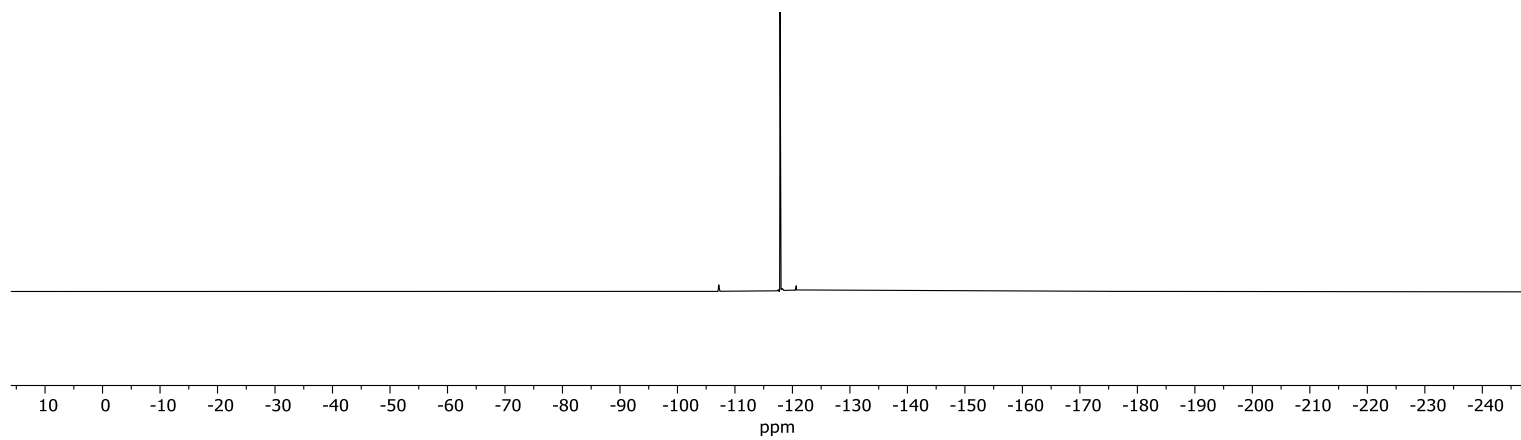

**Butyl (3-fluoropyridin-4-yl)phenylphosphinate (3cb)**

31P

— 24.42

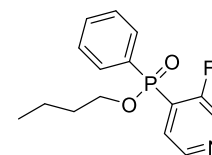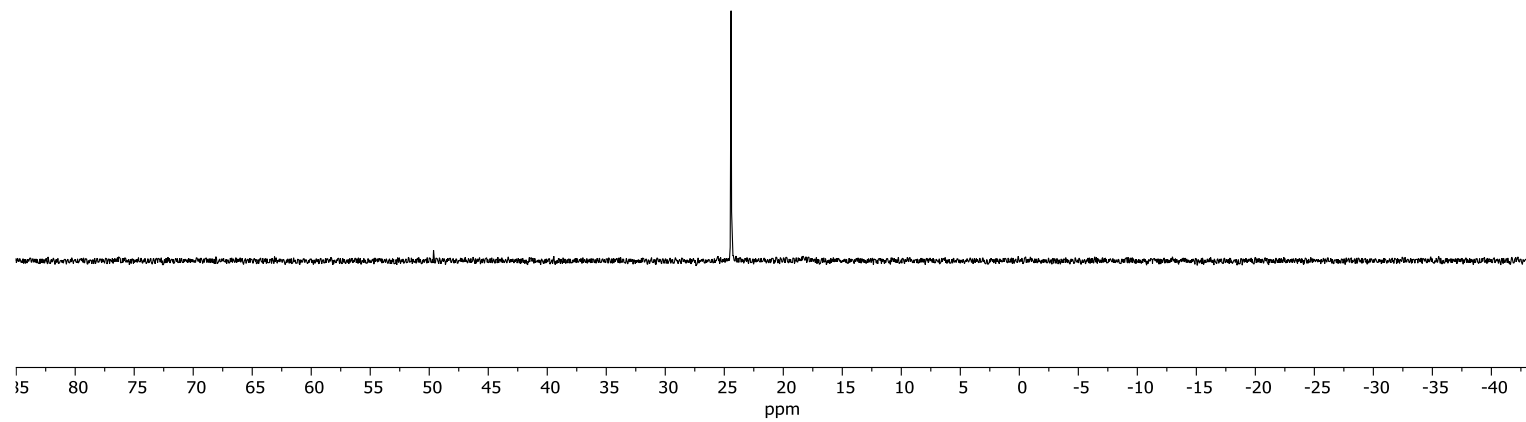

# Butyl (3-chloropyridin-4-yl)phenylphosphinate (3db)

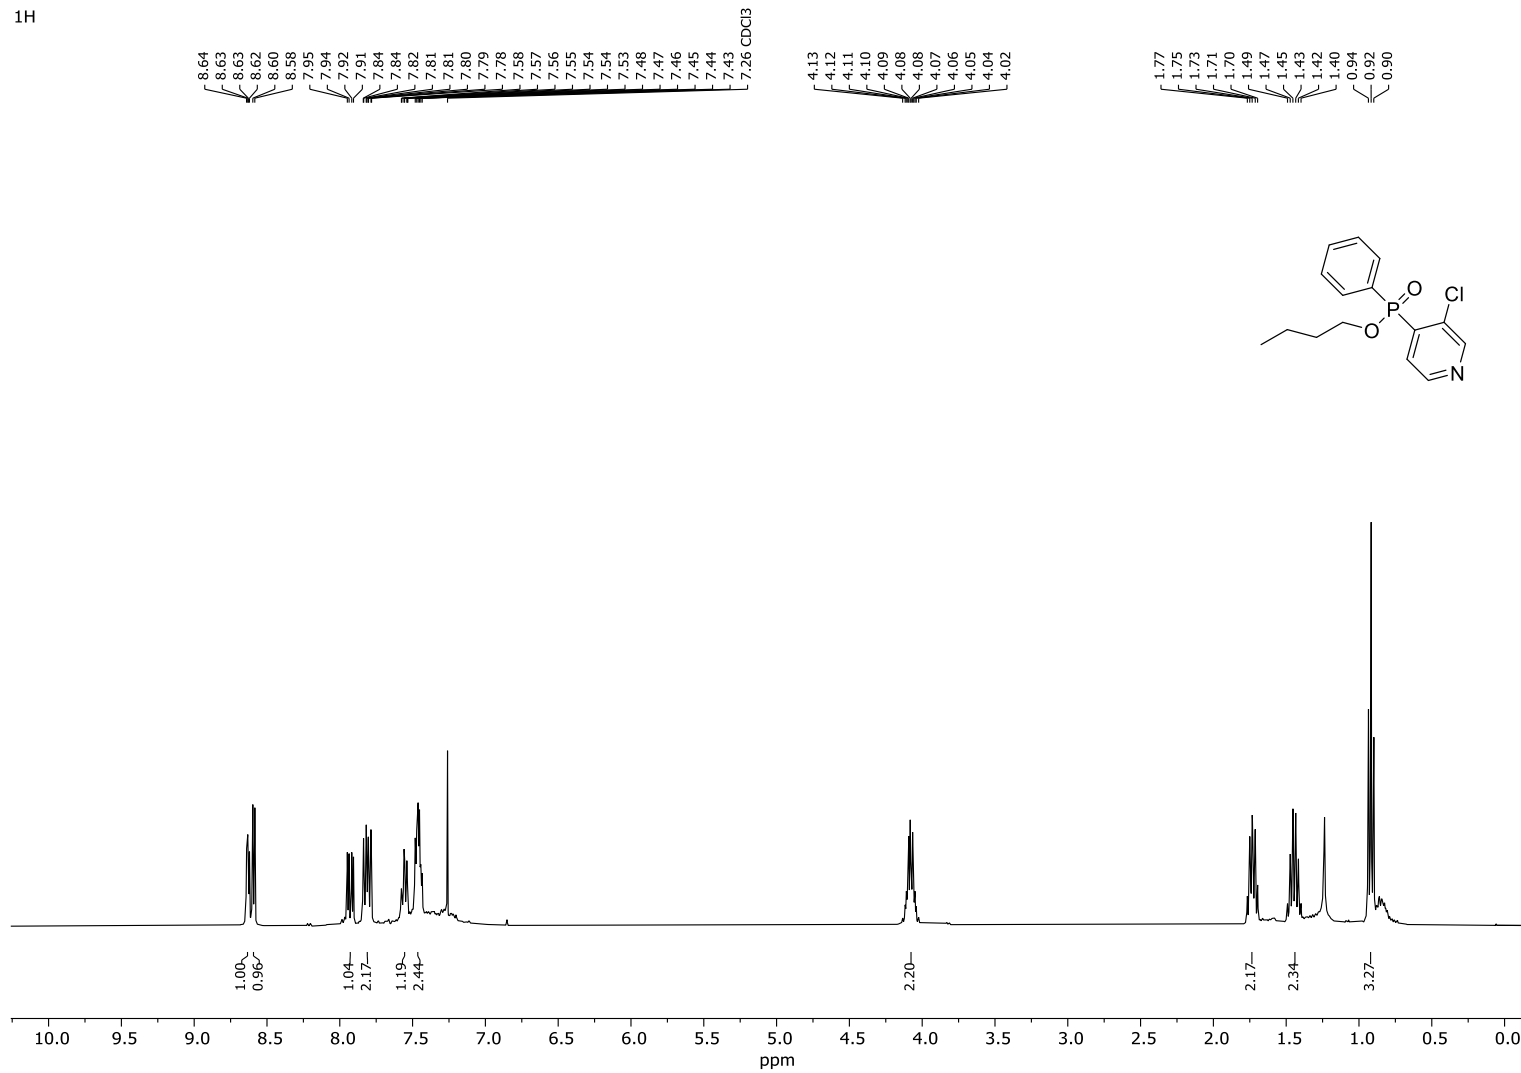

# Butyl (3-chloropyridin-4-yl)phenylphosphinate (3db)

<sup>13</sup>C

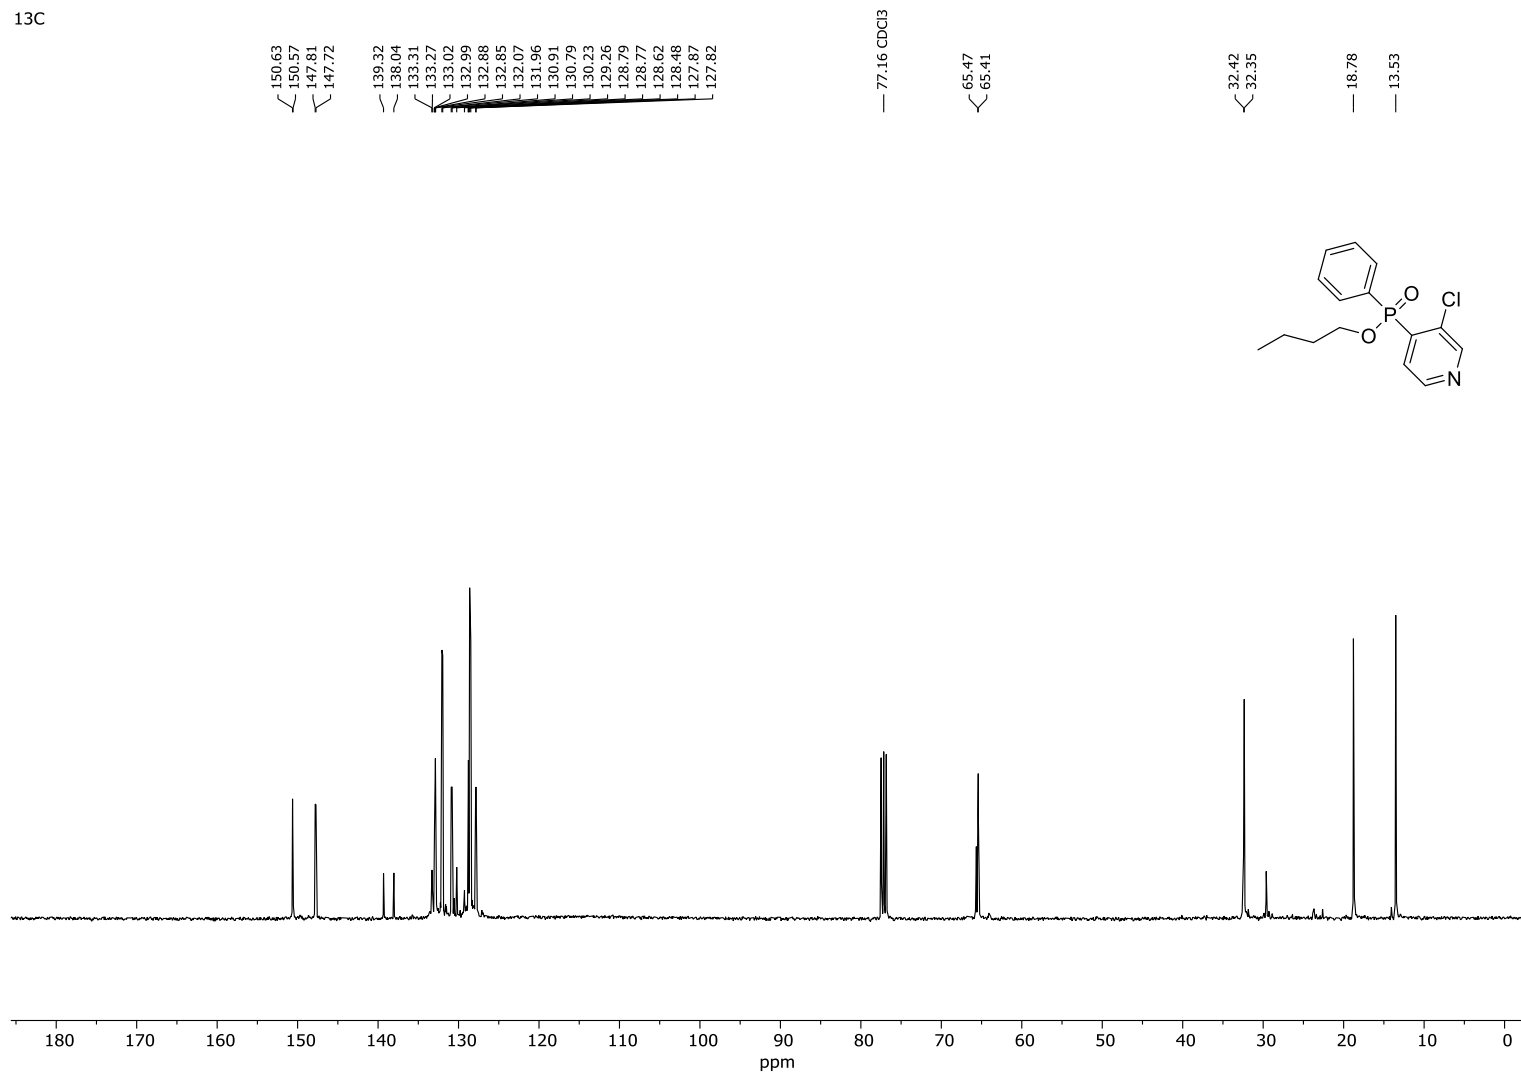

# Butyl (3-chloropyridin-4-yl)phenylphosphinate (3db)

1H-15N HMBC

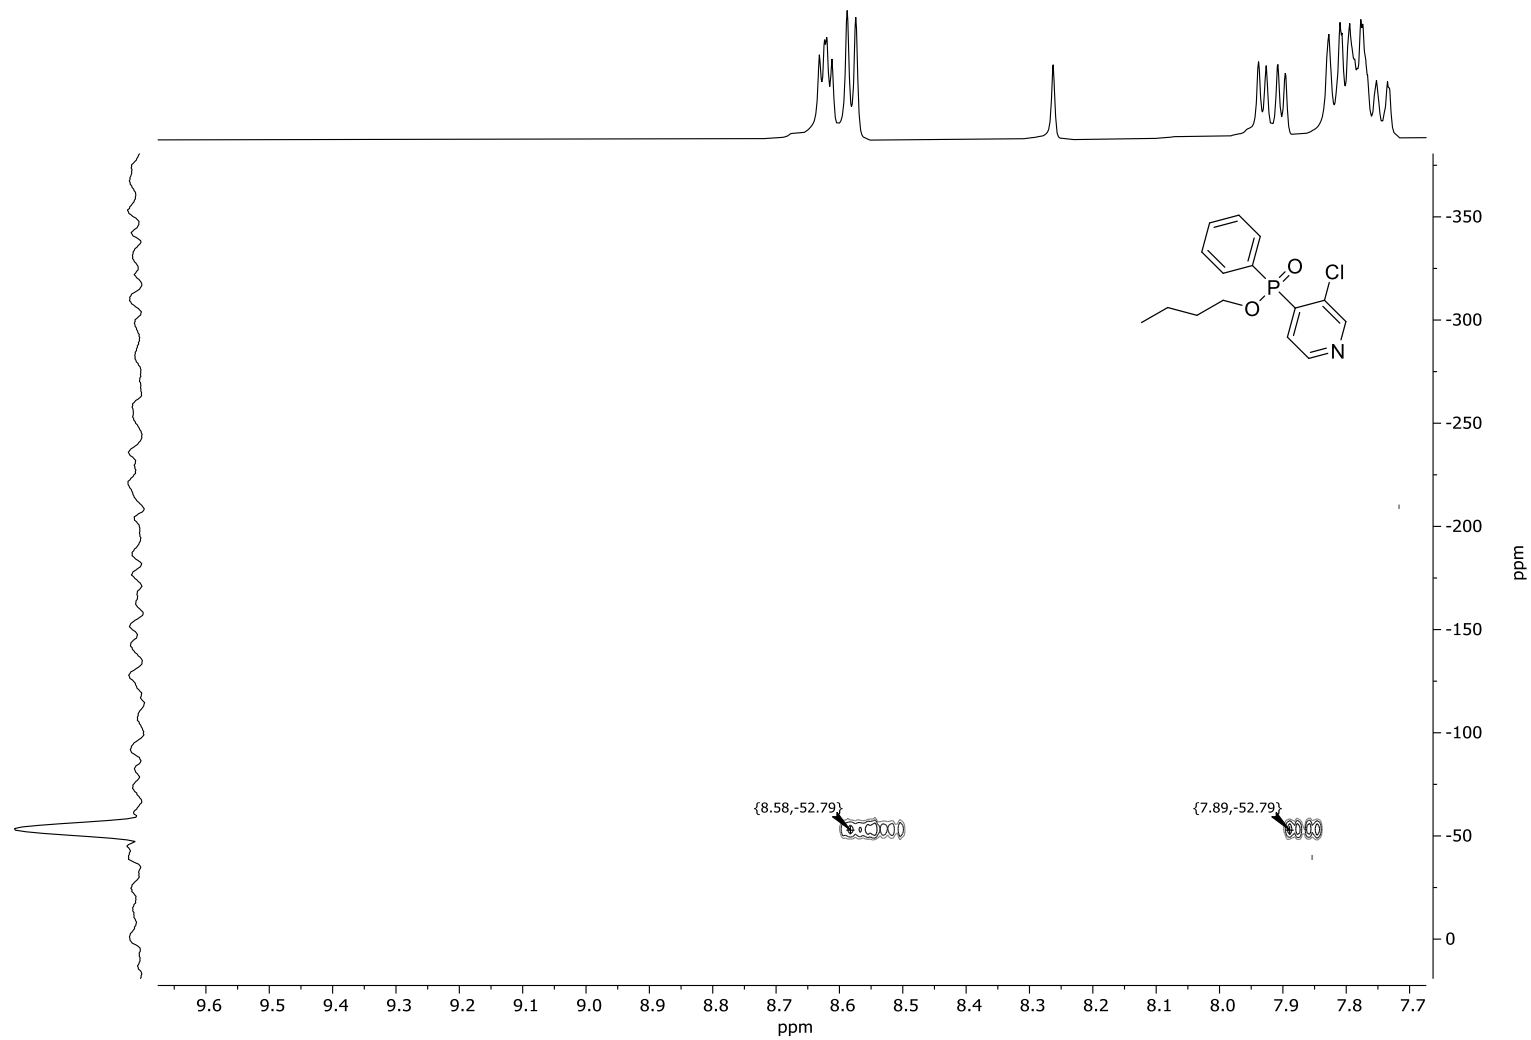

**Butyl (3-chloropyridin-4-yl)phenylphosphinate (3db)**

31P

— 25.70

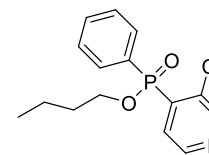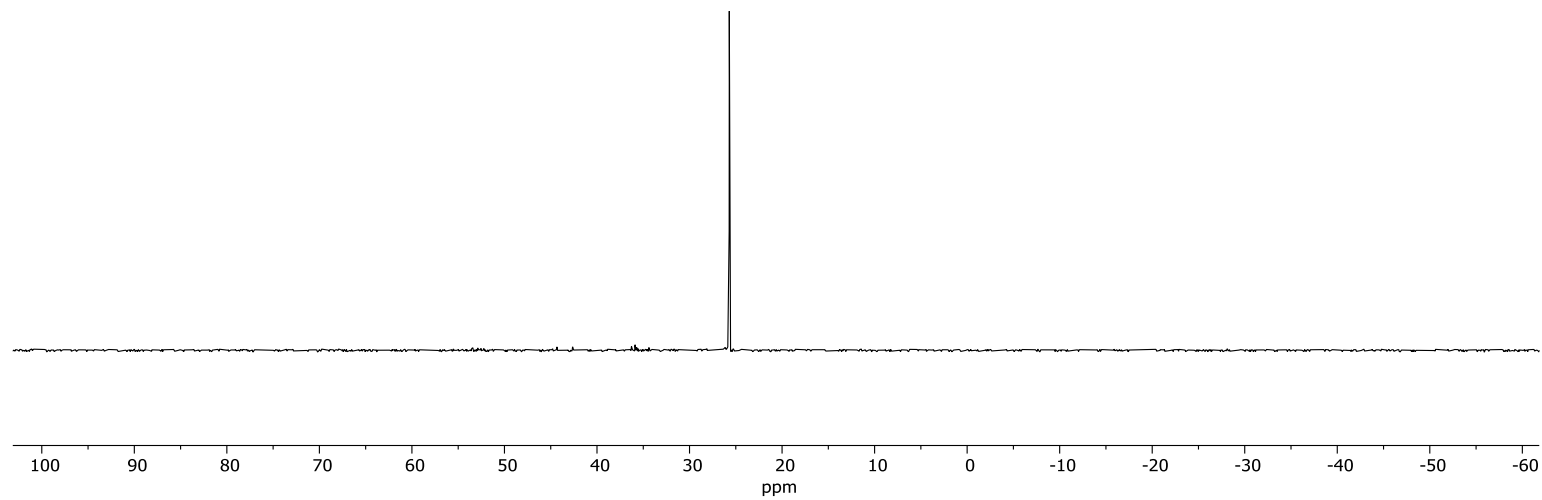

# 2-Methylpropyl phenyl(pyridin-4-yl)phosphinate (3ac)

<sup>1</sup>H

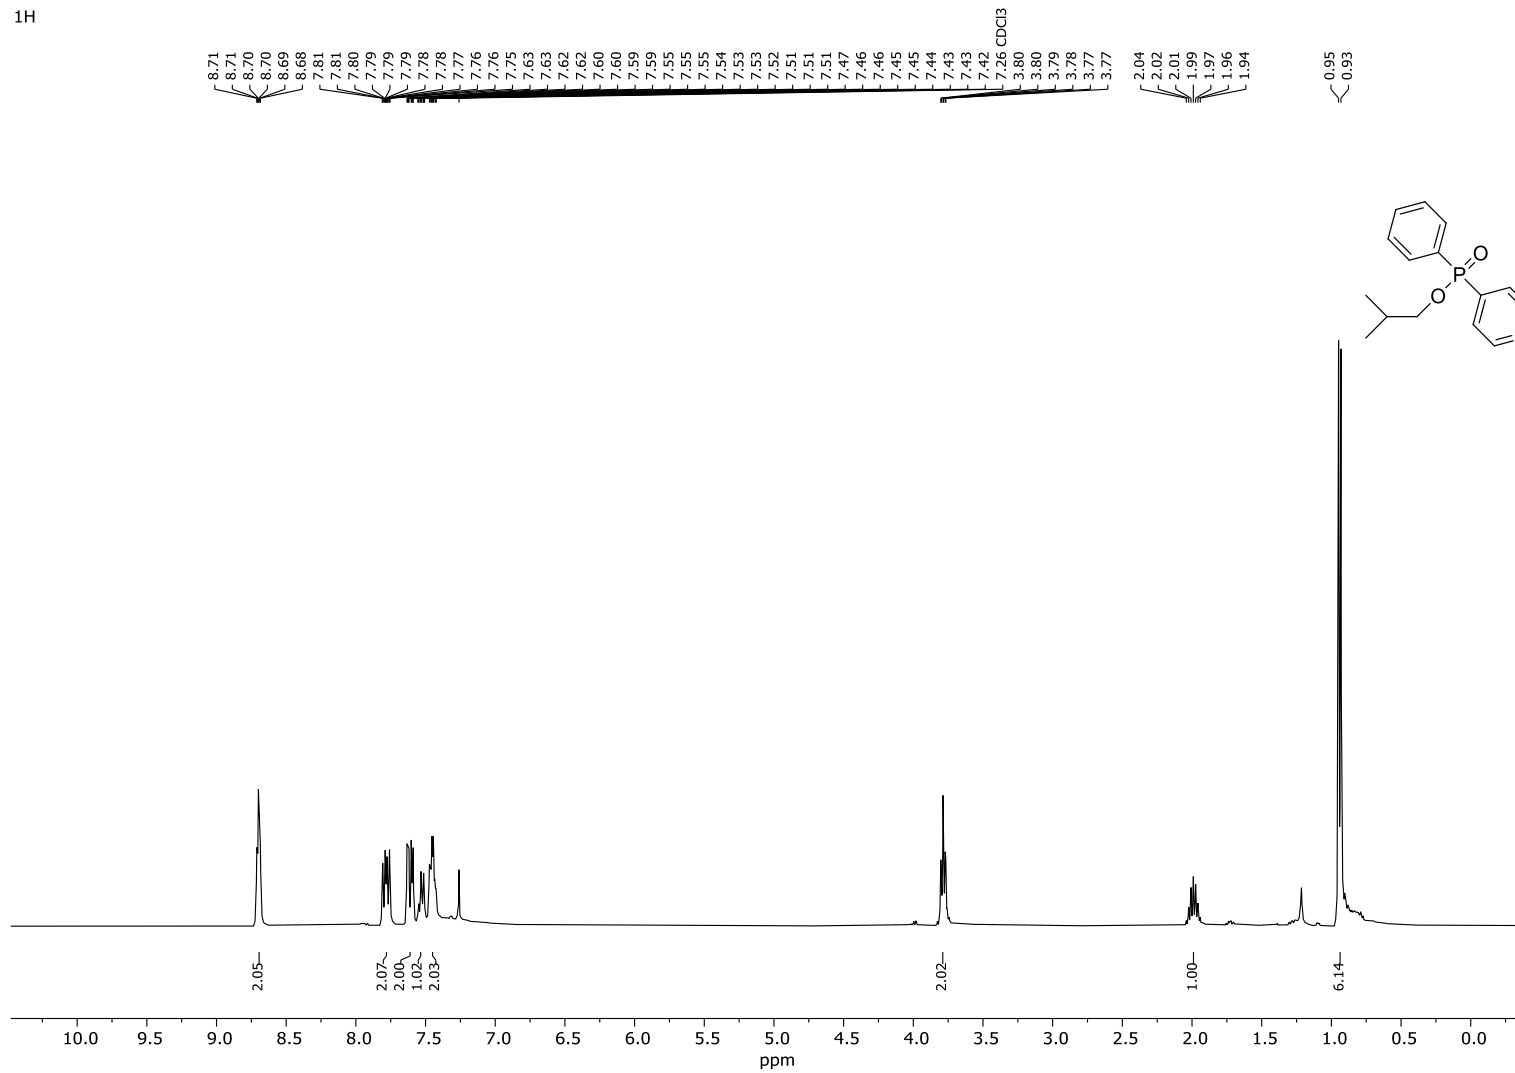



## 2-Methylpropyl phenyl(pyridin-4-yl)phosphinate (3ac)

<sup>13</sup>C

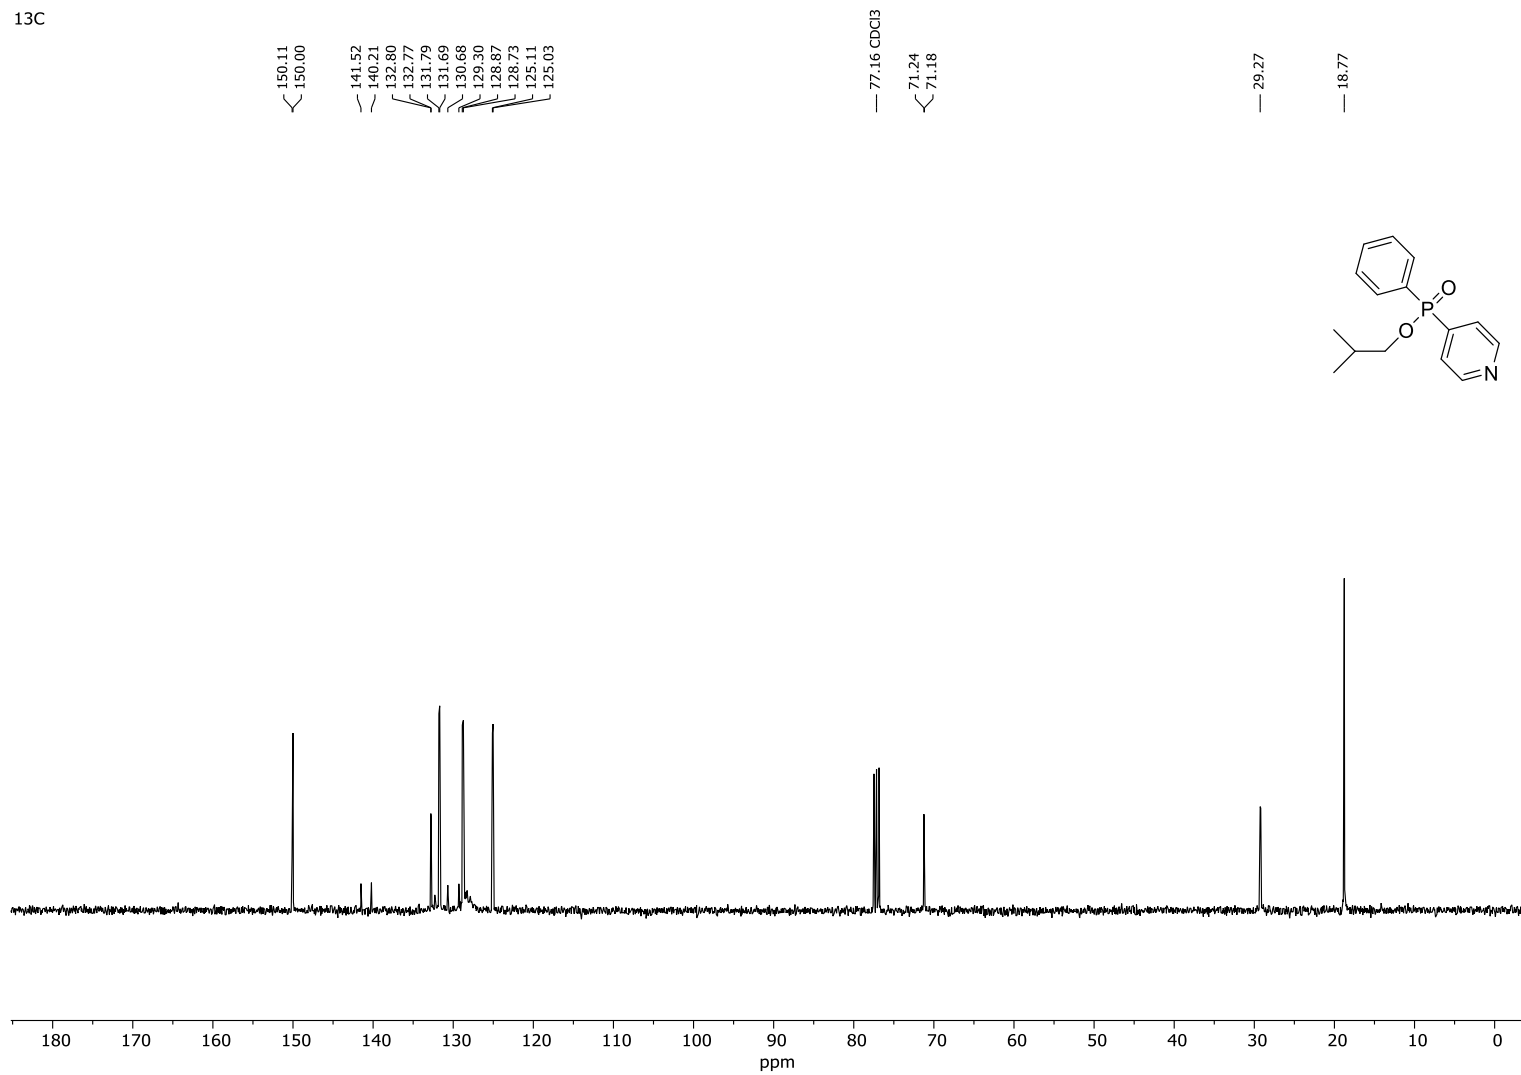

# 2-Methylpropyl phenyl(pyridin-4-yl)phosphinate (3ac)

31P

— 28.64

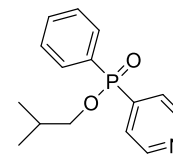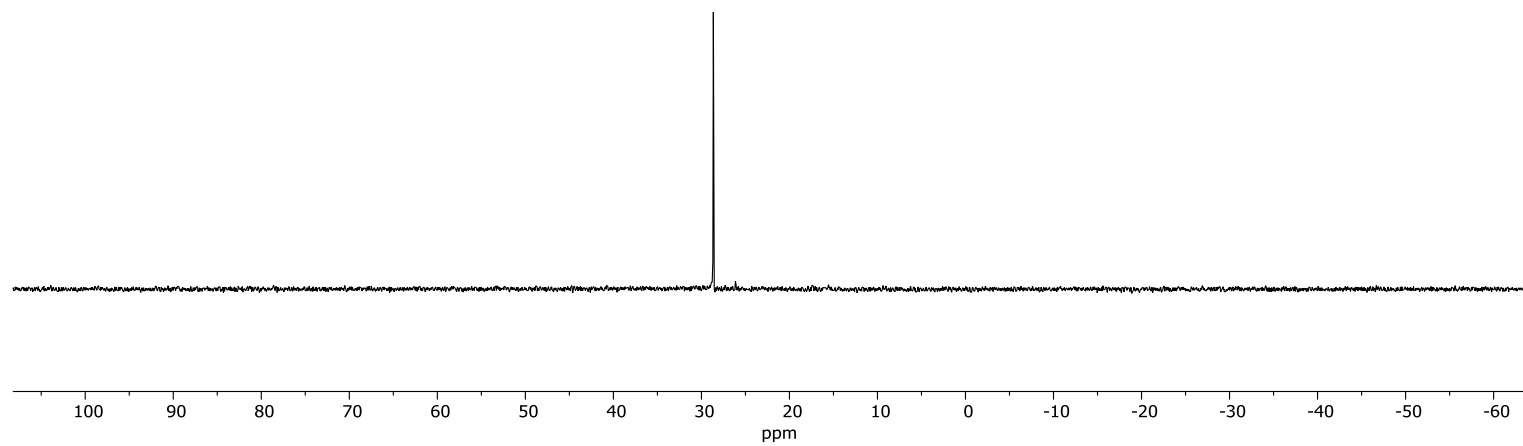

## 2-Methylpropyl (3-methylpyridin-4-yl)phenylphosphinate (3bc)

<sup>1</sup>H

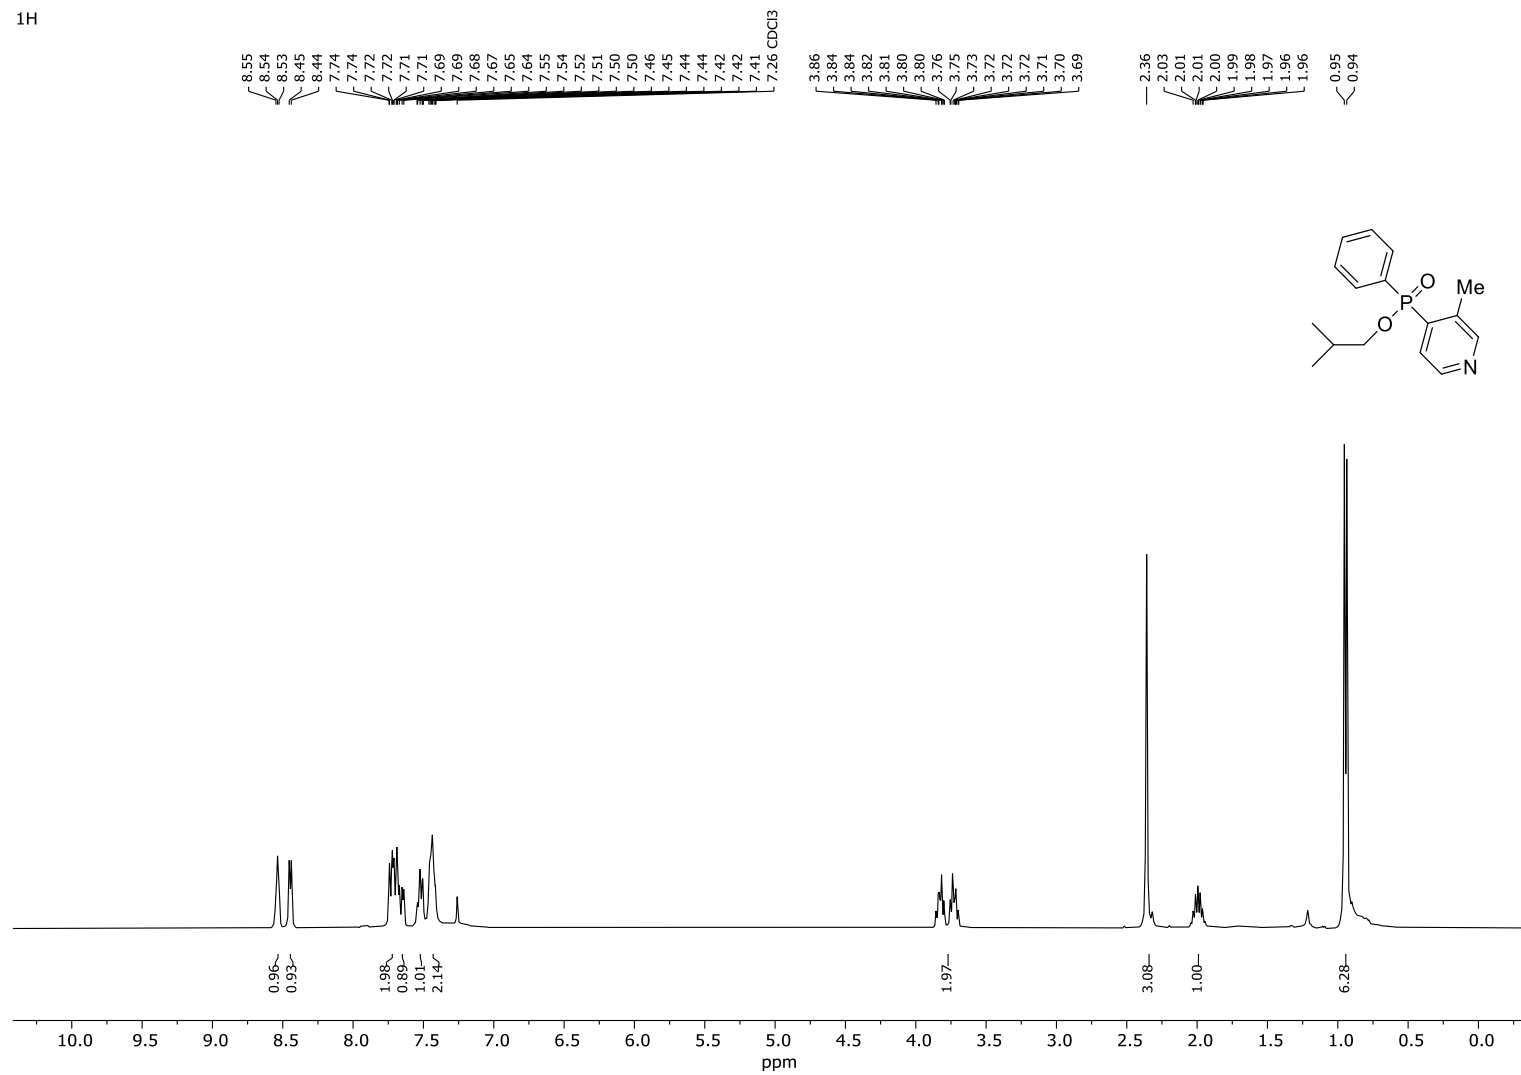

## 2-Methylpropyl (3-methylpyridin-4-yl)phenylphosphinate (3bc)

<sup>13</sup>C

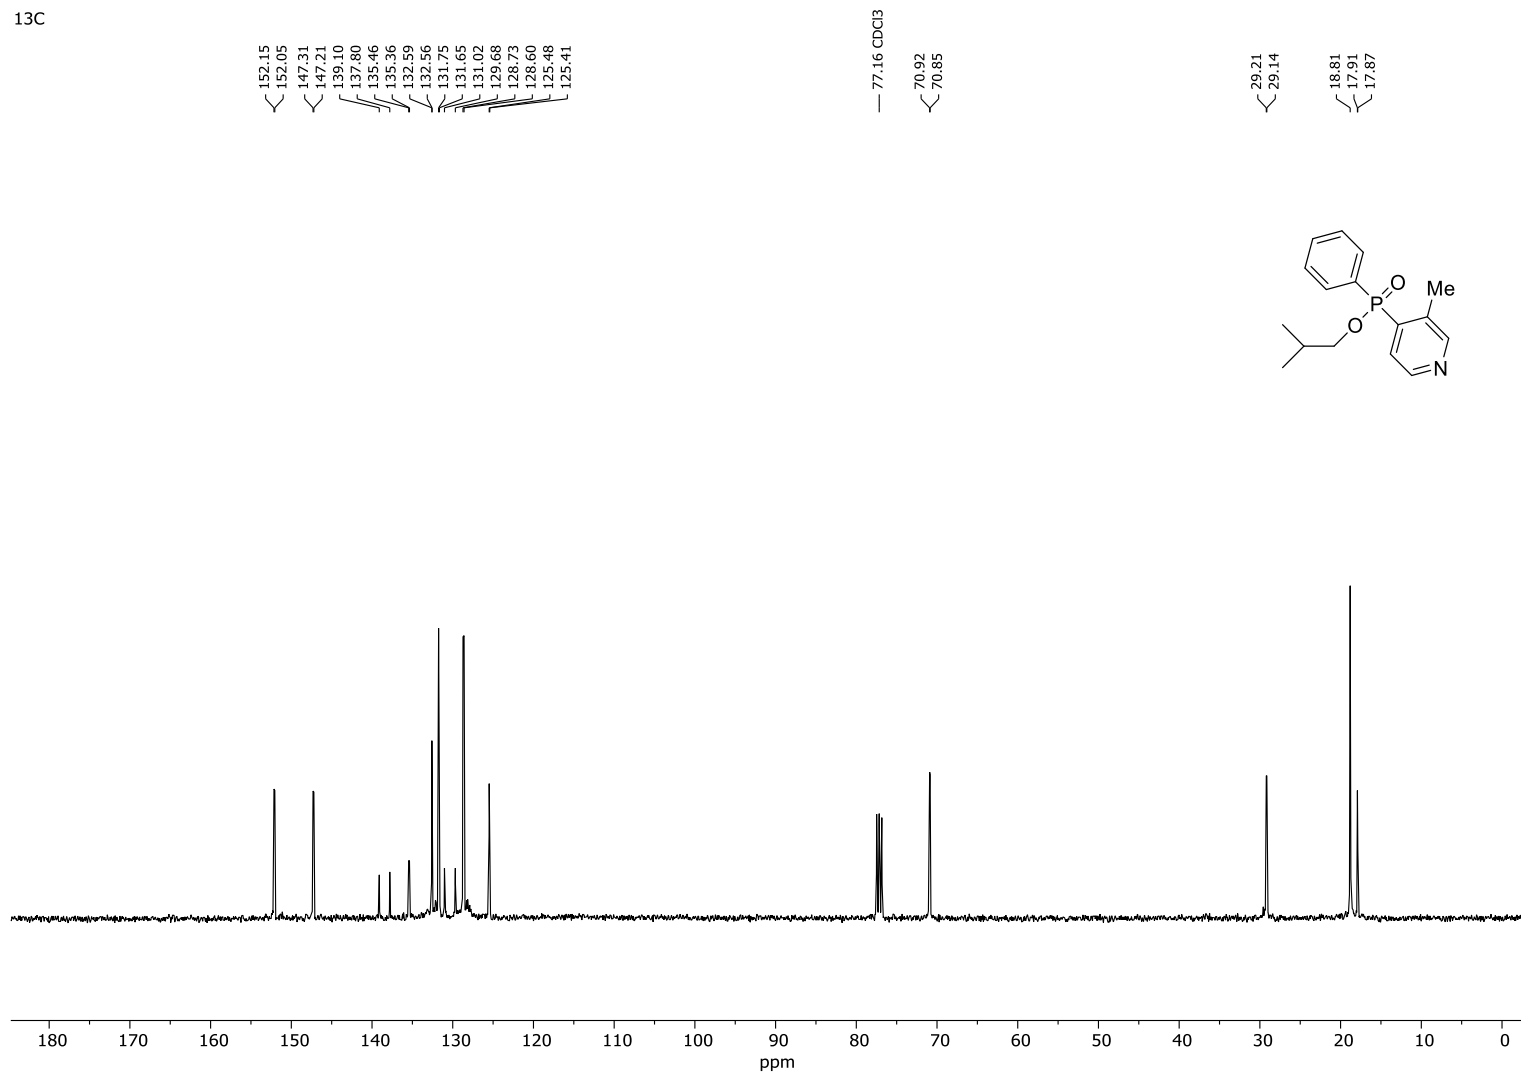

**2-Methylpropyl (3-methylpyridin-4-yl)phenylphosphinate (3bc)**

31P

— 29.22

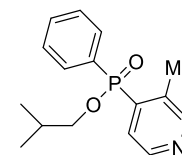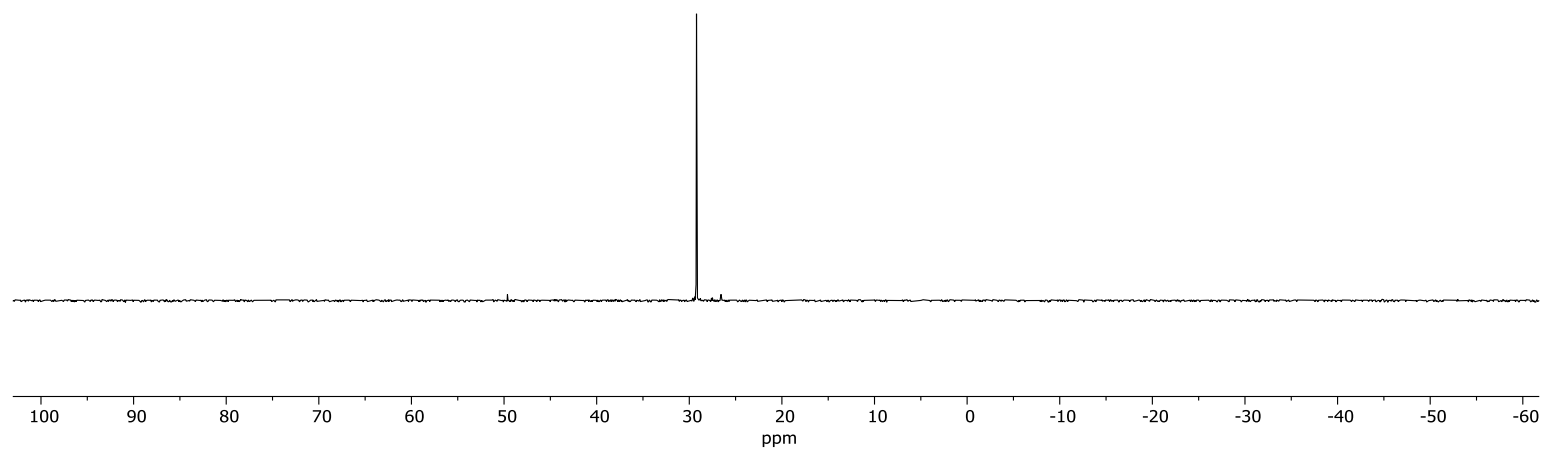

# Hexyl phenyl(pyridin-4-yl)phosphinate (3ad)

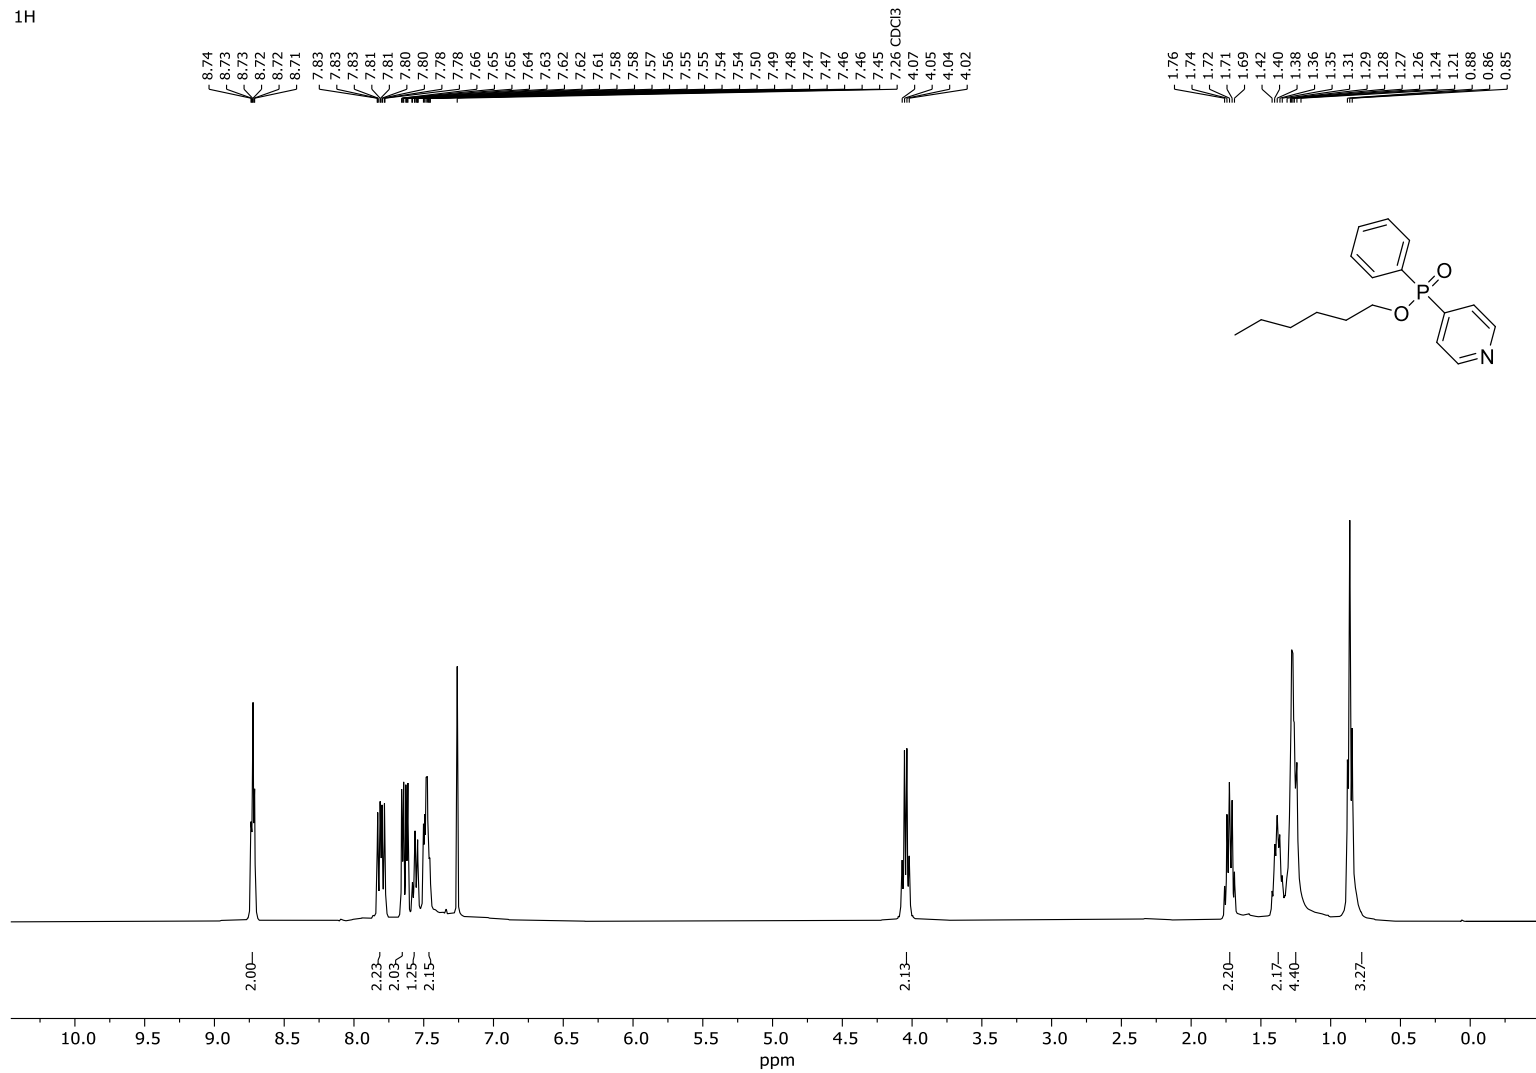

# Hexyl phenyl(pyridin-4-yl)phosphinate (3ad)

<sup>13</sup>C

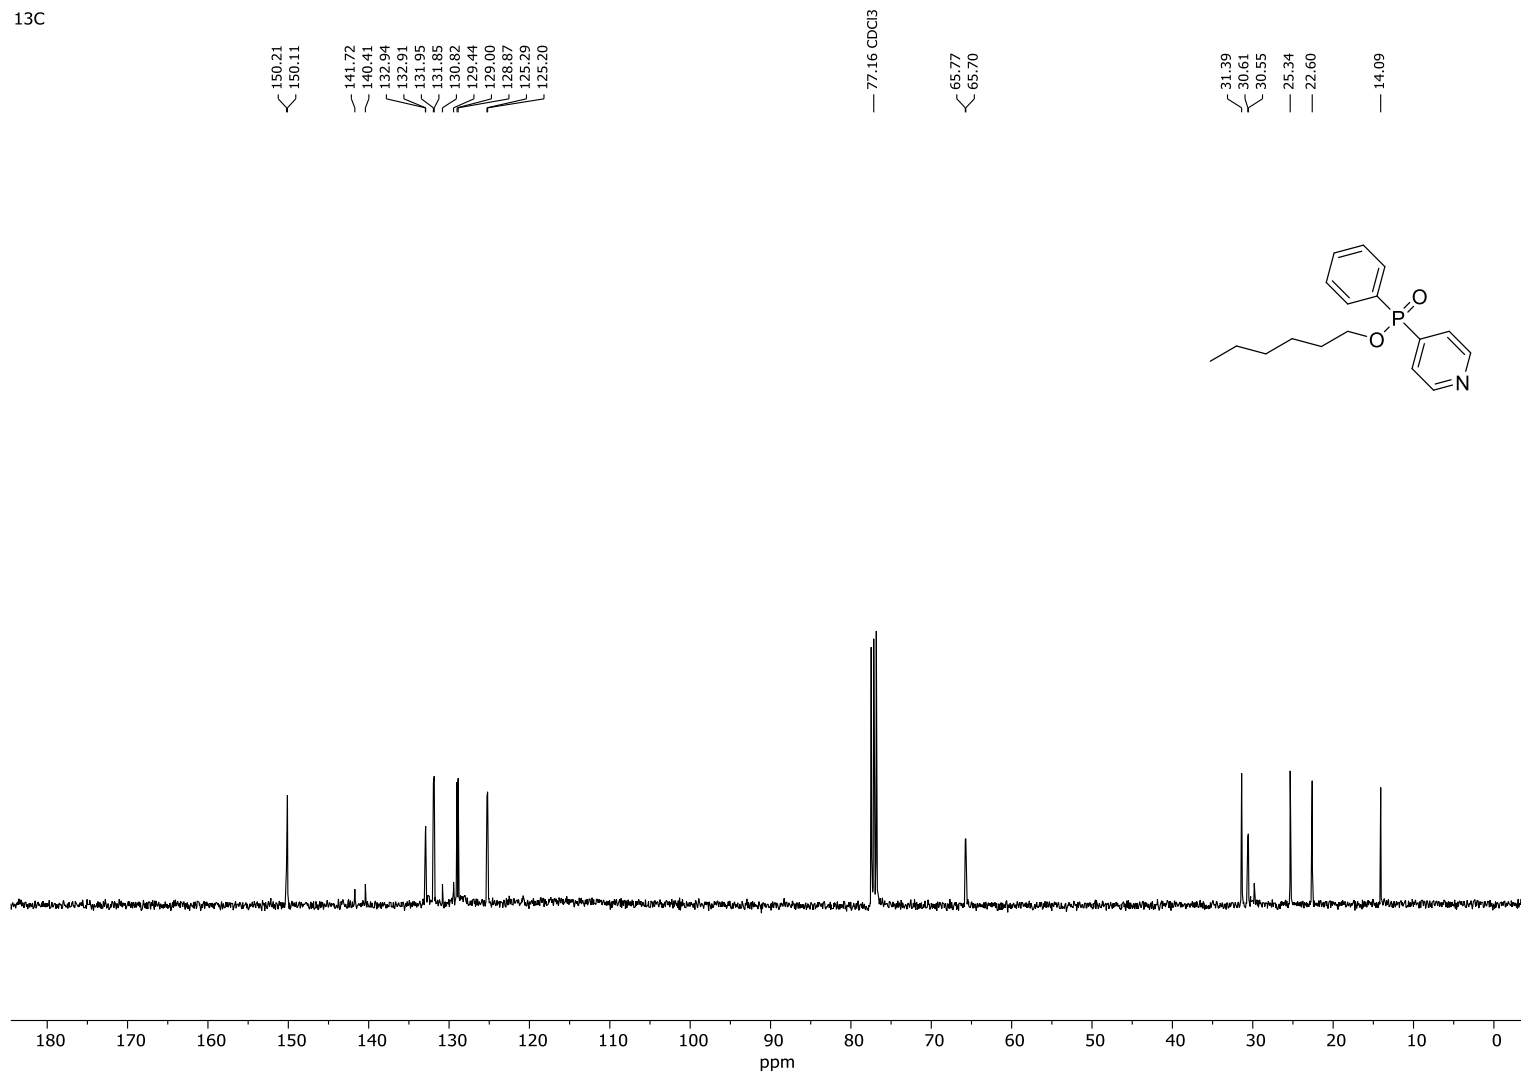

# Hexyl phenyl(pyridin-4-yl)phosphinate (3ad)

31P

28.81

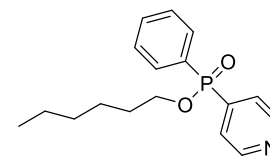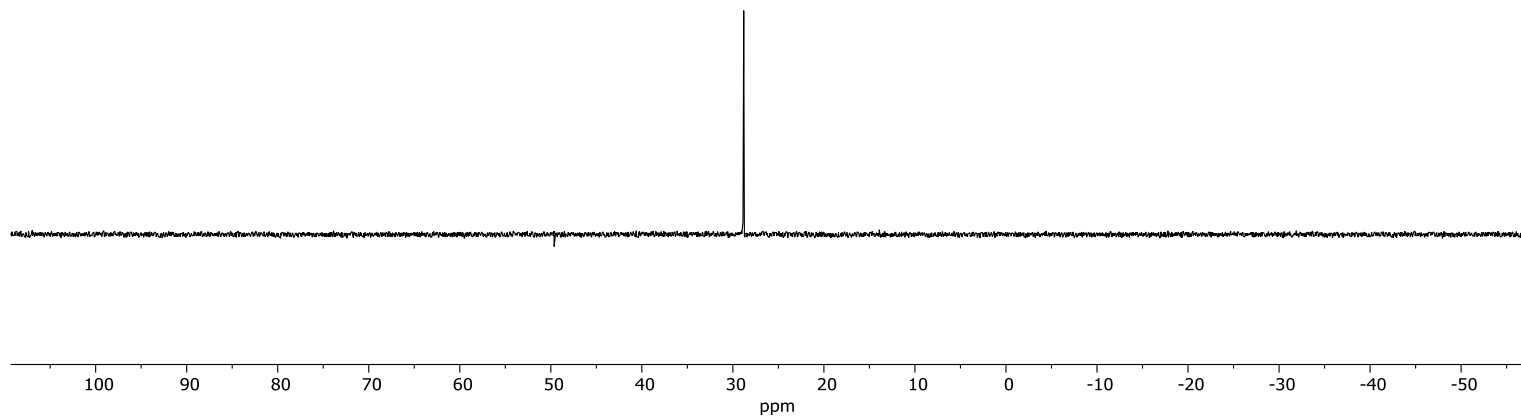



# Hexyl (3-methylpyridin-4-yl)phenylphosphinate (3bd)

<sup>1</sup>H

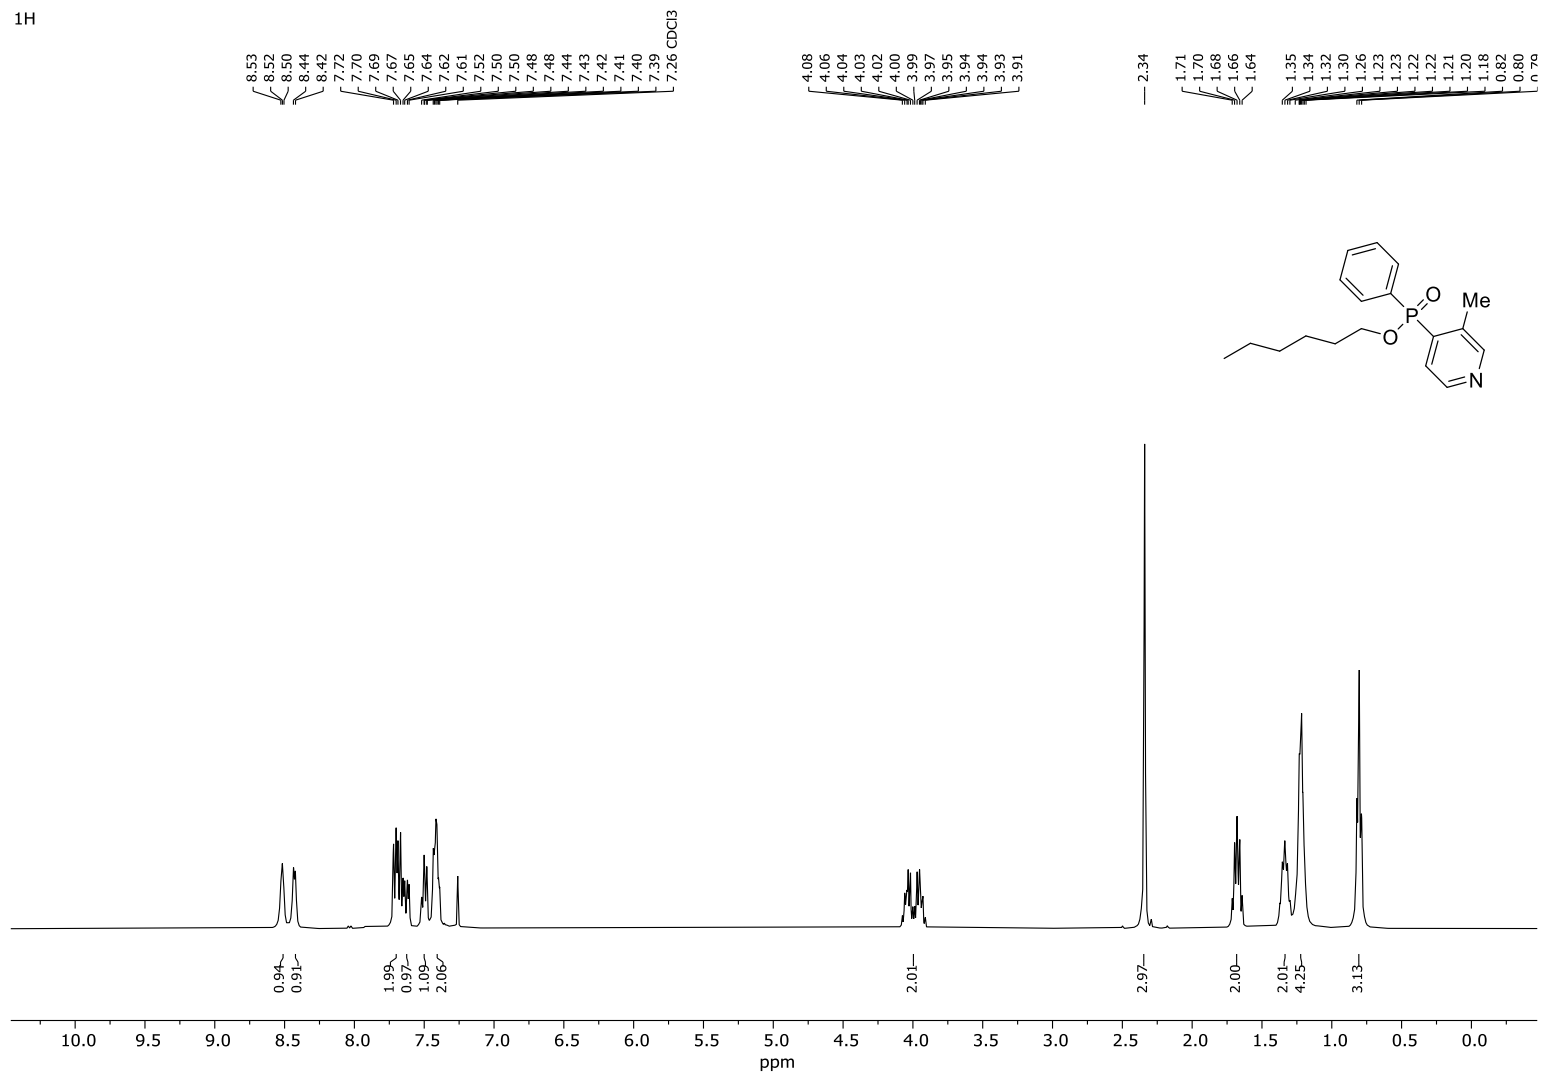

# Hexyl (3-methylpyridin-4-yl)phenylphosphinate (3bd)

<sup>13</sup>C

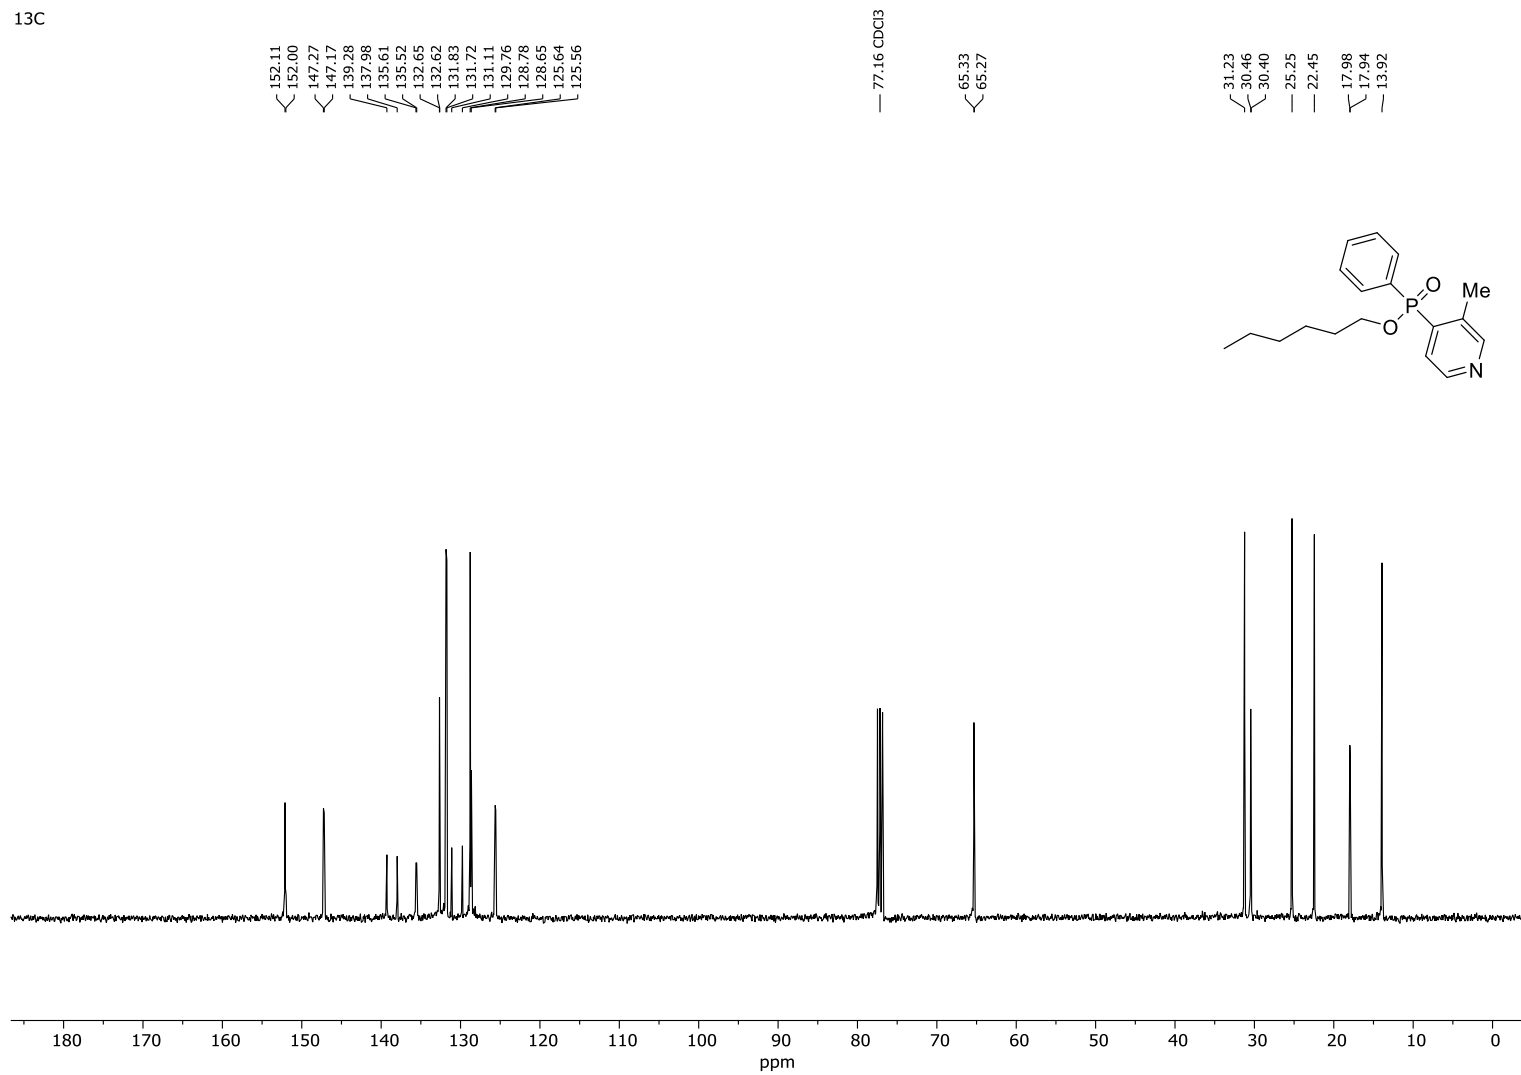

# Hexyl (3-methylpyridin-4-yl)phenylphosphinate (3bd)

1H-15N HMBC

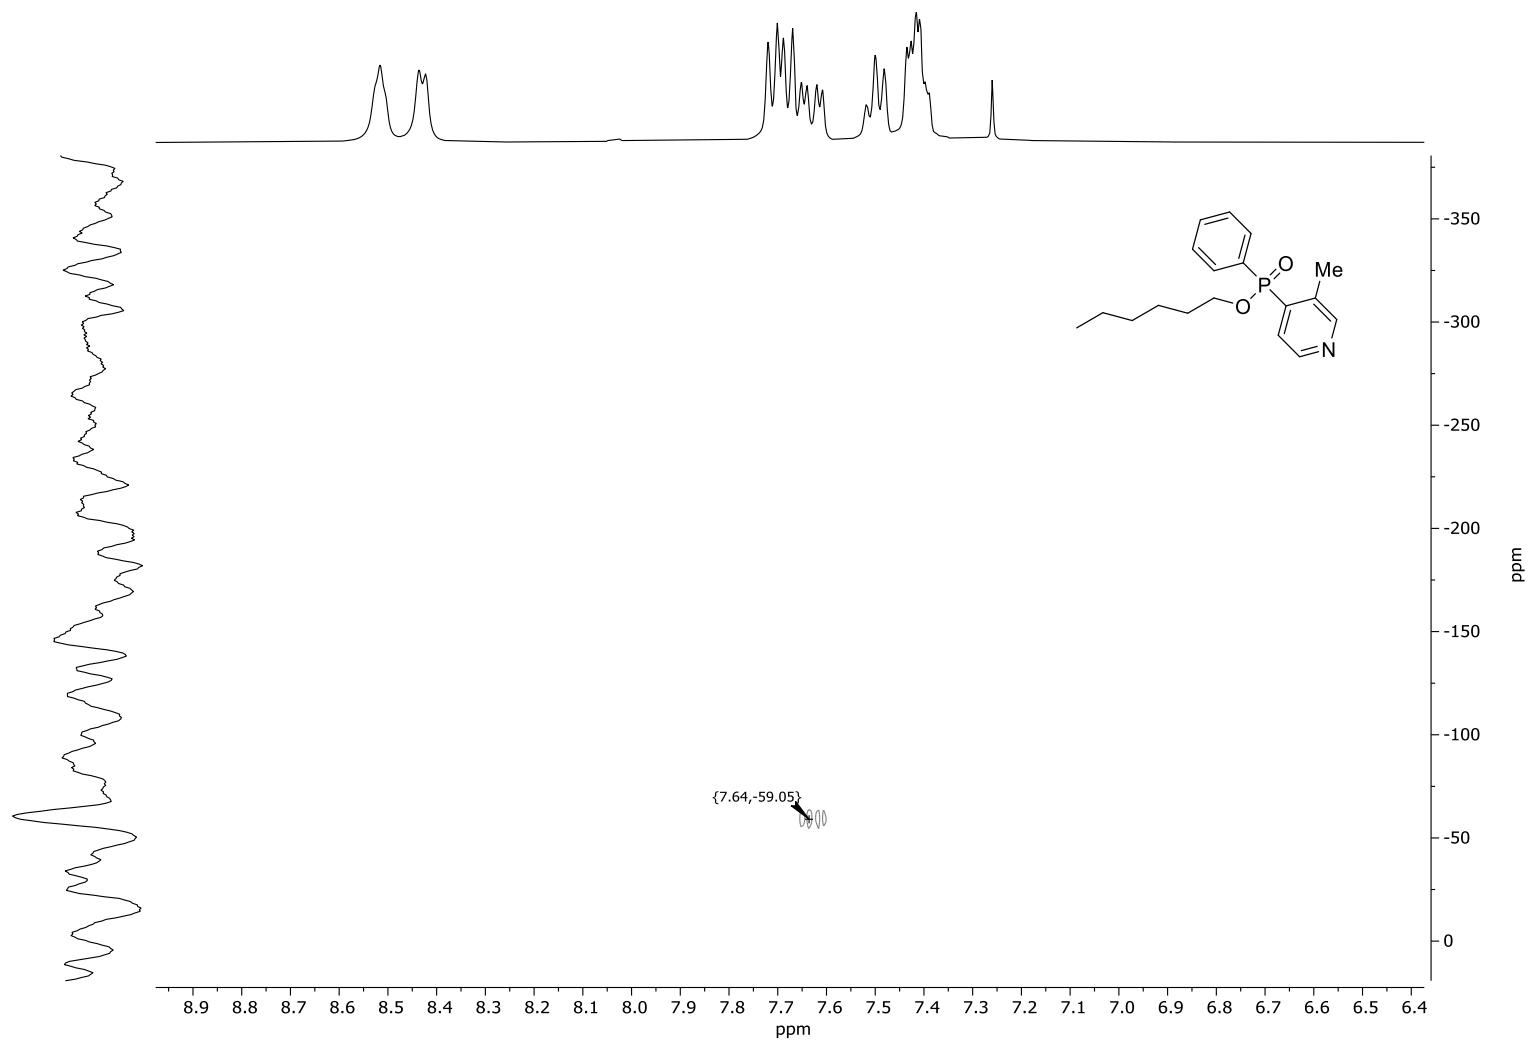

# Hexyl (3-methylpyridin-4-yl)phenylphosphinate (3bd)

31P

— 29.40

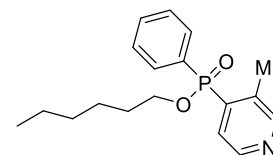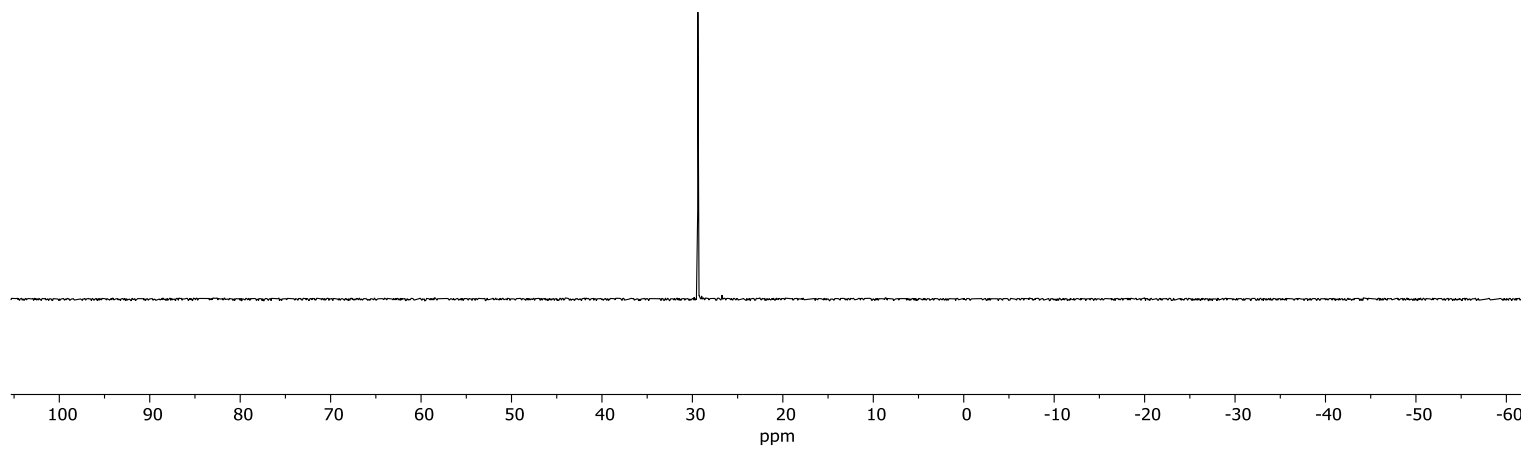

# Prop-2-en-1-yl phenyl(pyridin-4-yl)phosphinate (3ae)

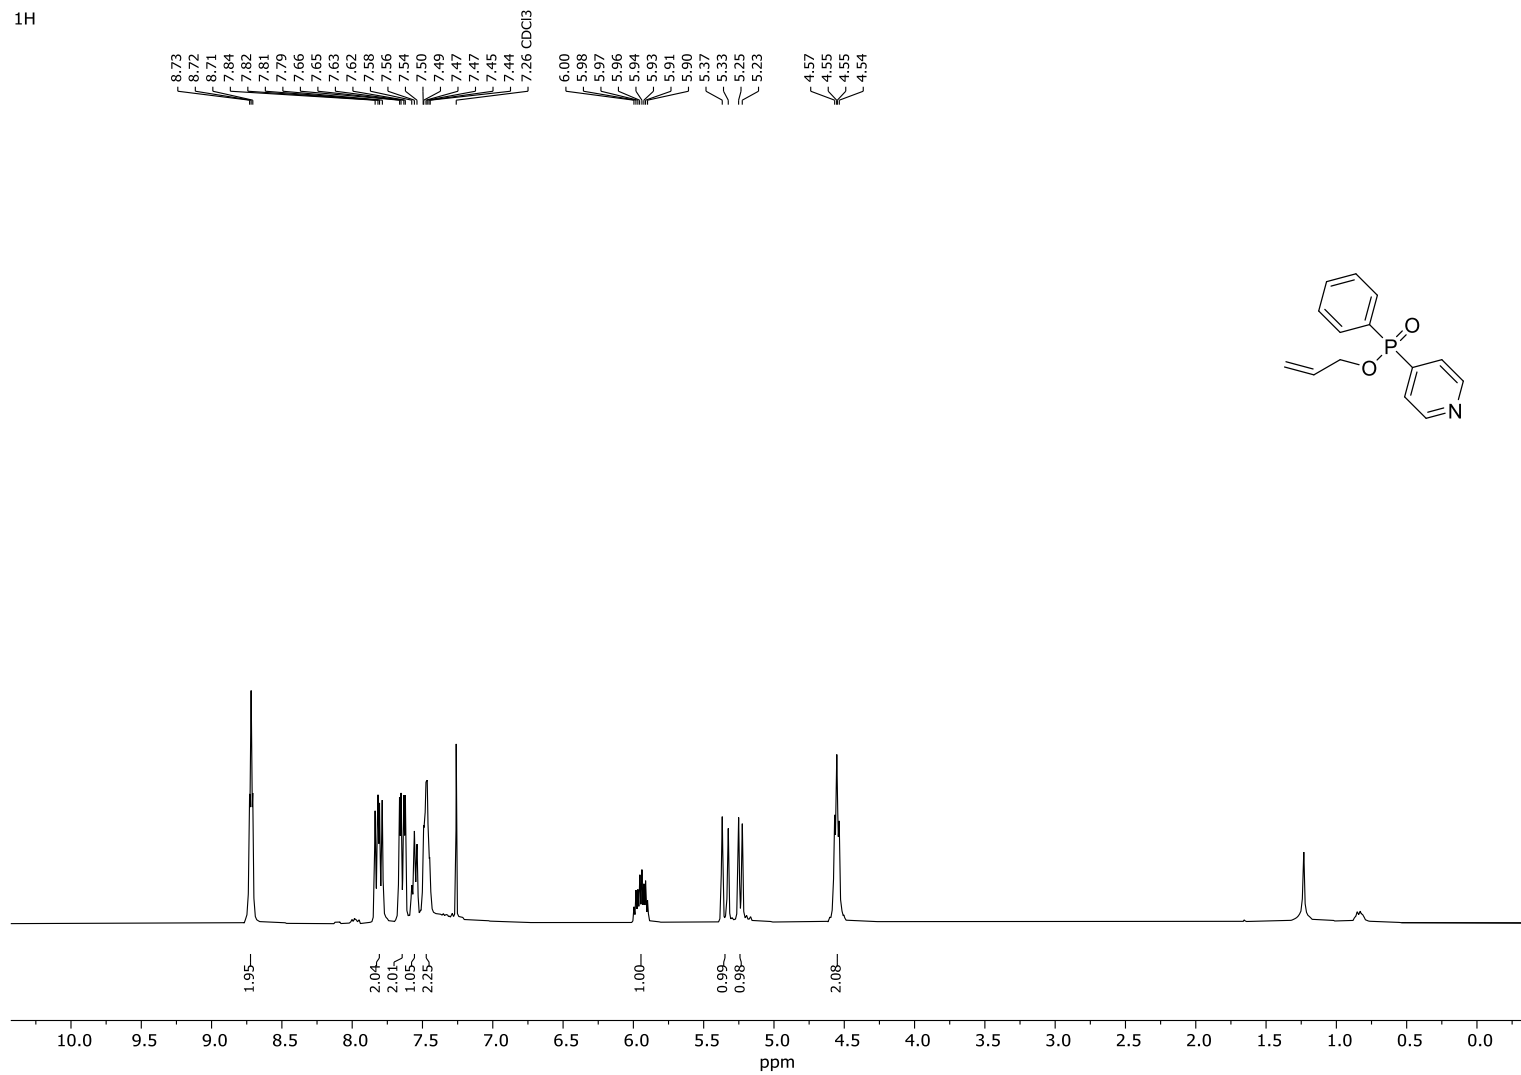

# Prop-2-en-1-yl phenyl(pyridin-4-yl)phosphinate (3ae)

<sup>13</sup>C

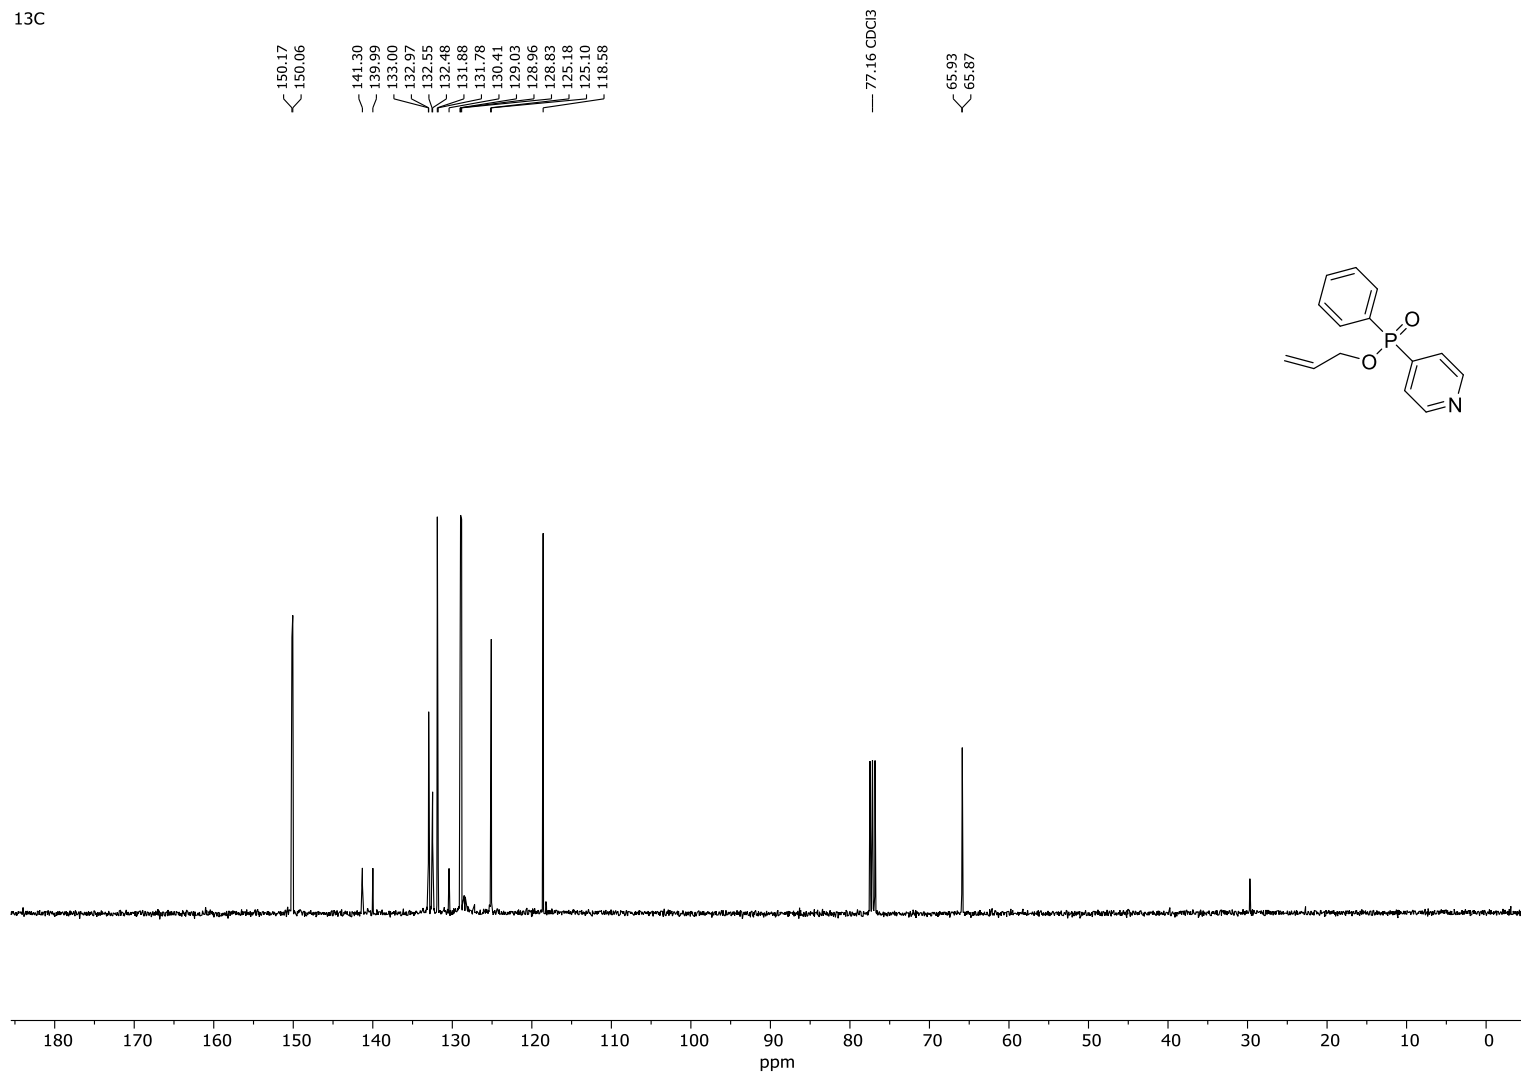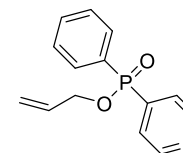

**Prop-2-en-1-yl phenyl(pyridin-4-yl)phosphinate (3ae)**

31P

— 29.78

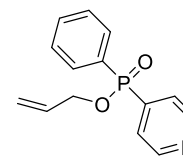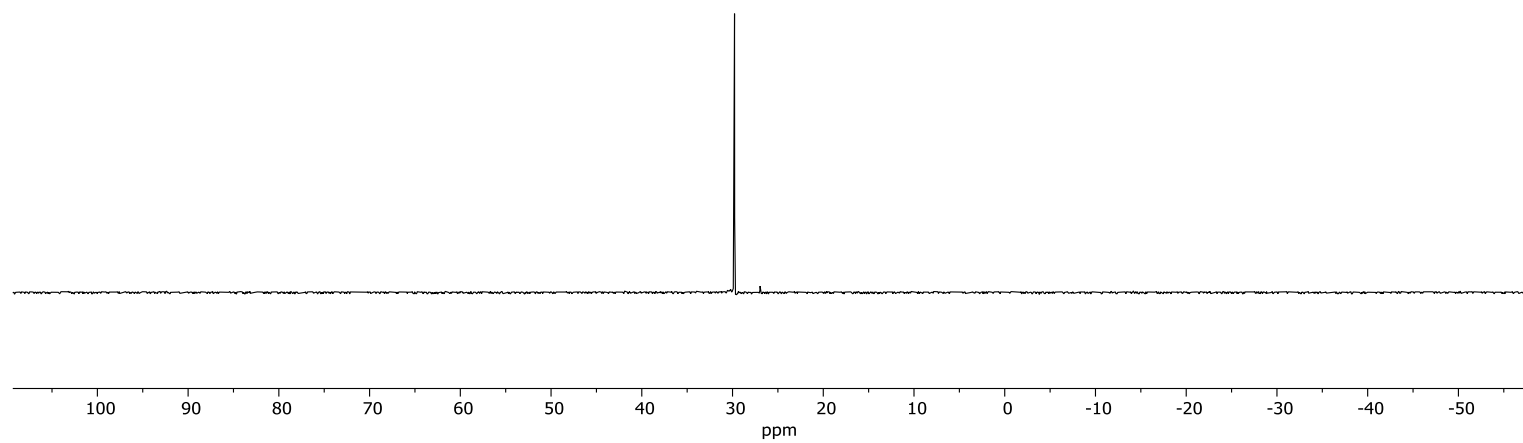

# Prop-2-en-1-yl (3-methylpyridin-4-yl)phenylphosphinate (3be)

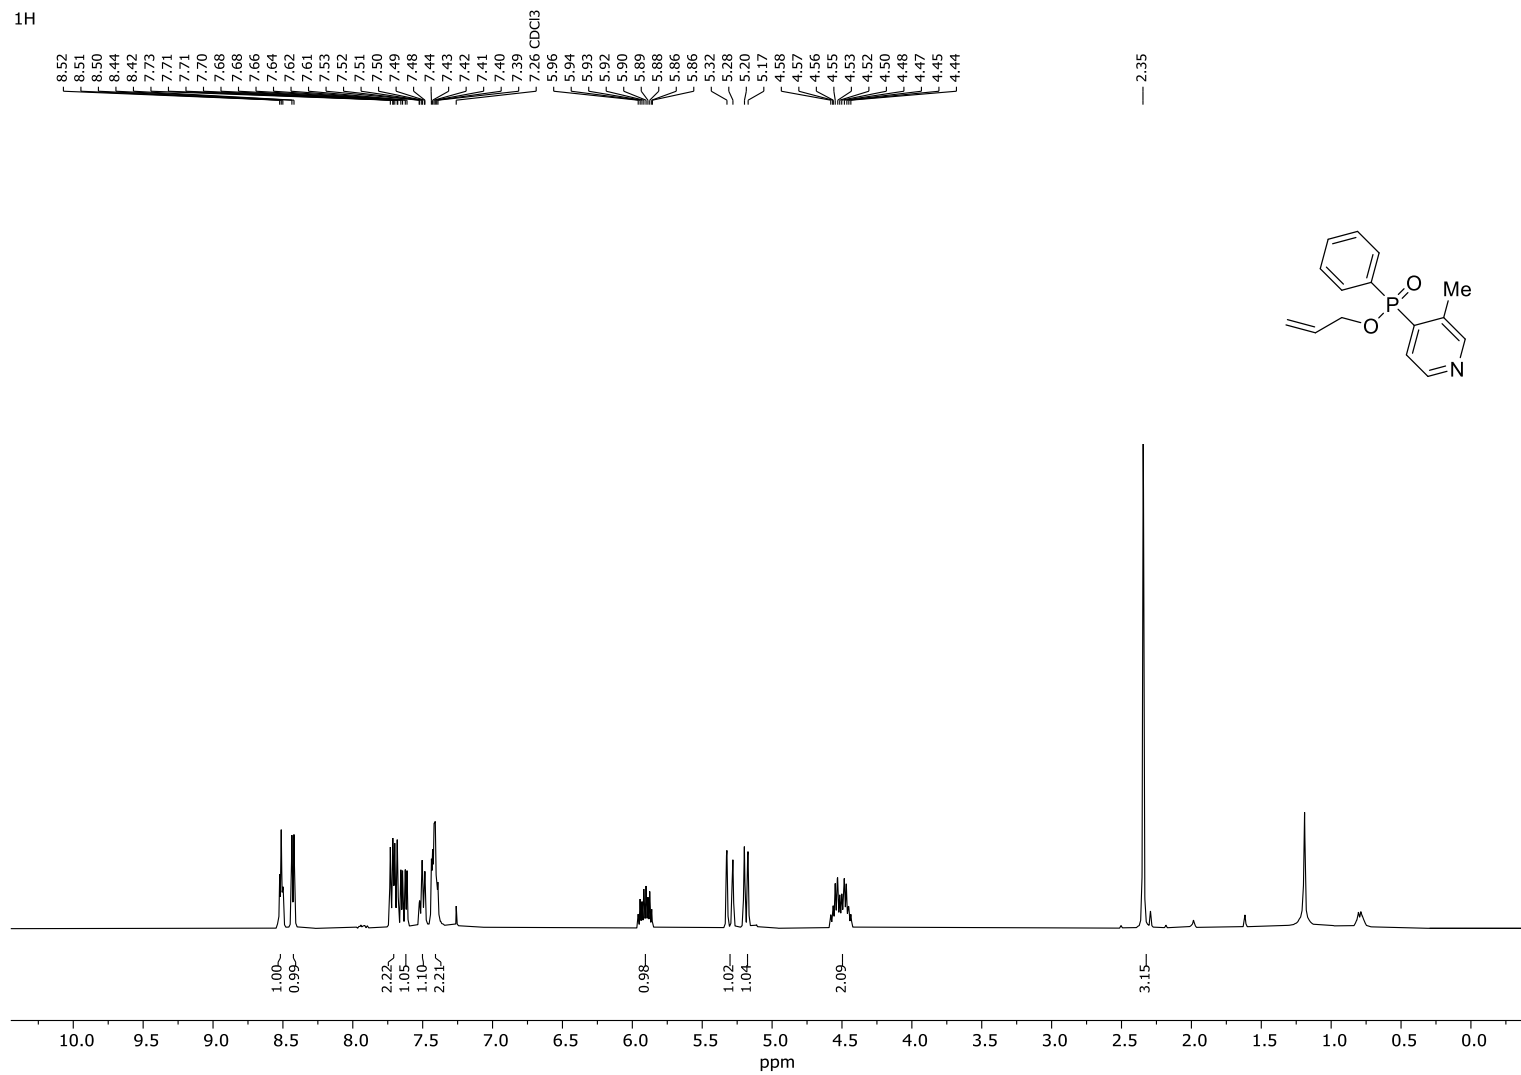



# Prop-2-en-1-yl (3-methylpyridin-4-yl)phenylphosphinate (3be)

<sup>13</sup>C

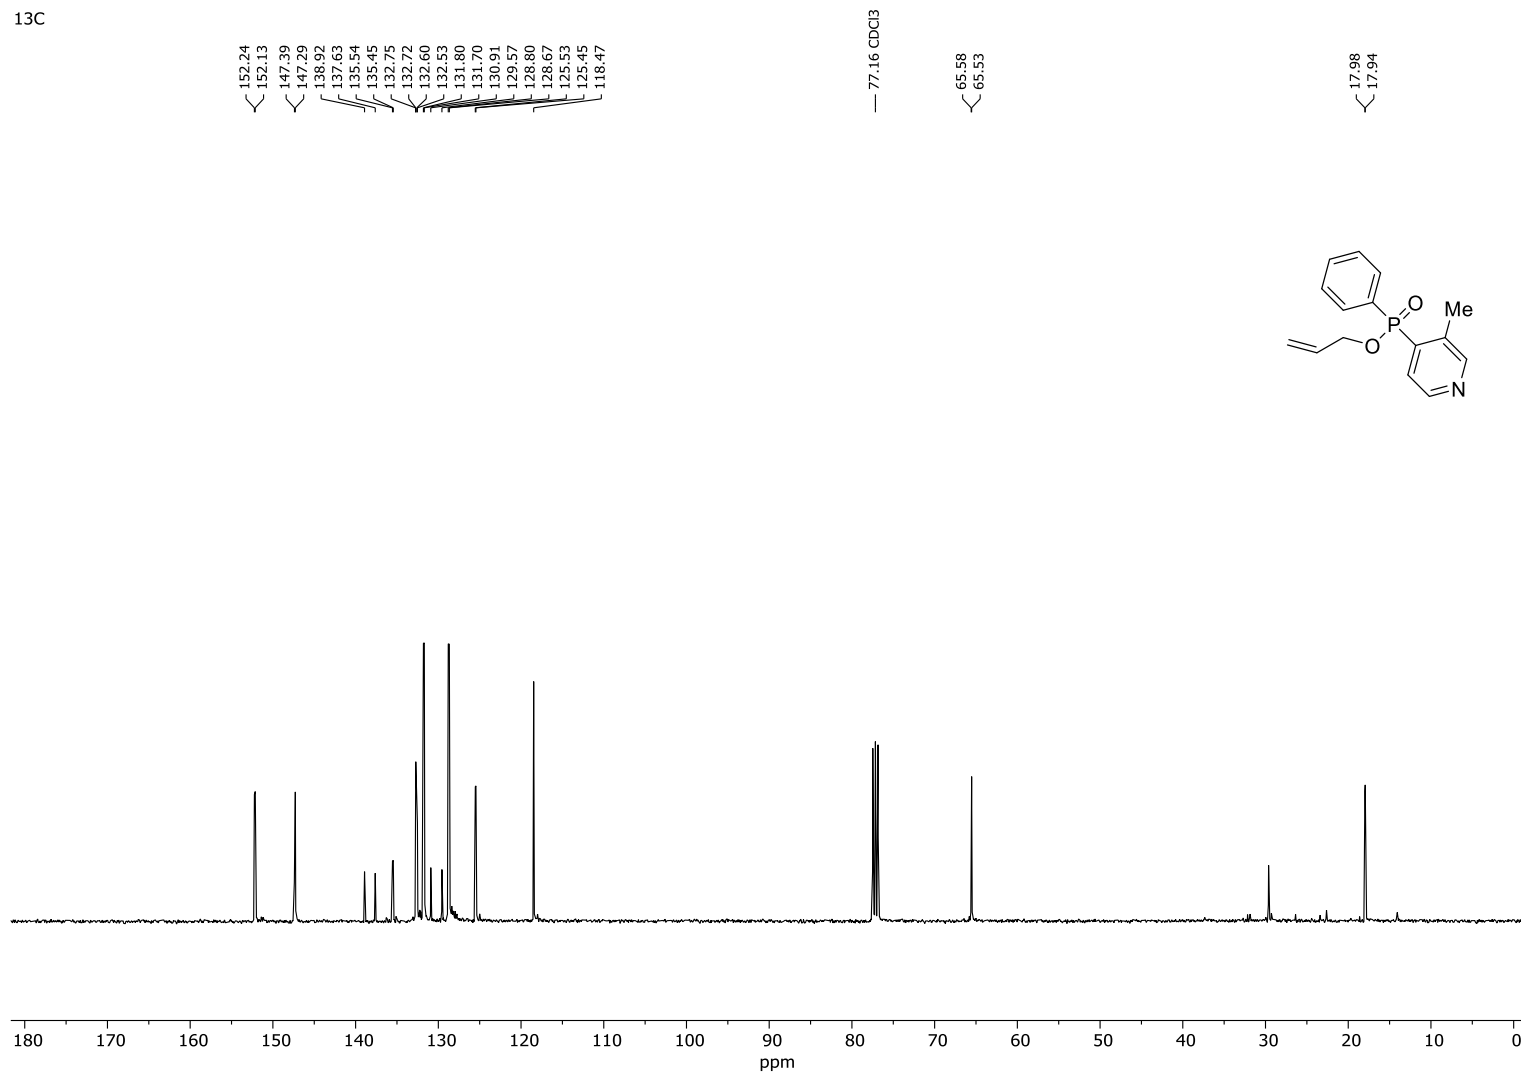

**Prop-2-en-1-yl (3-methylpyridin-4-yl)phenylphosphinate (3be)**

31P

— 30.41

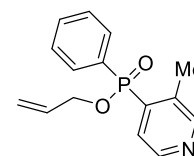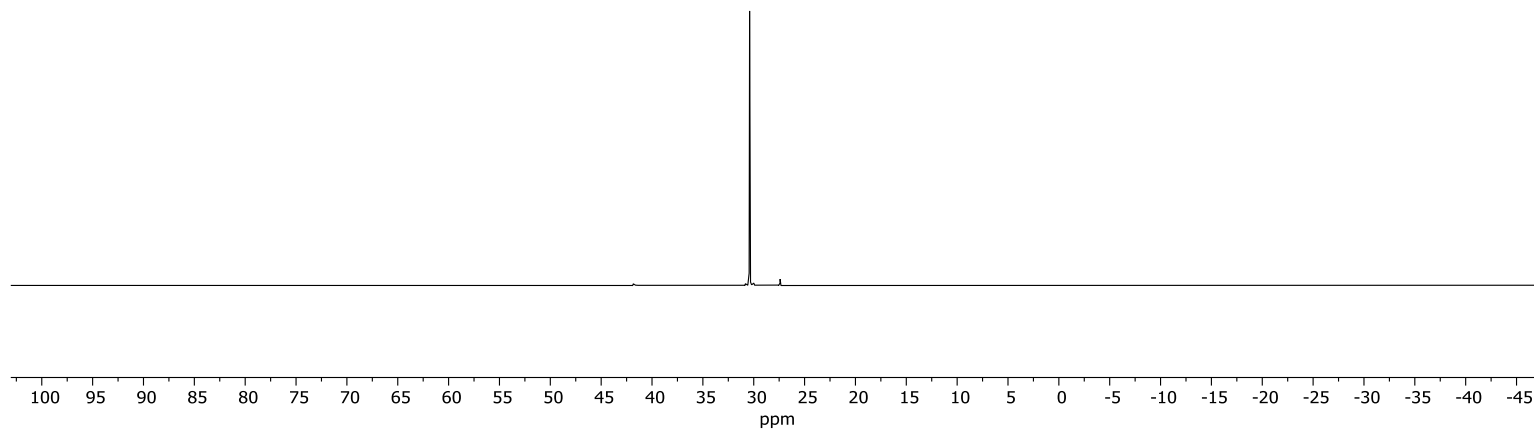

# 4-[Hydroxy(phenyl)phosphoryl]pyridin-1-ium chloride (5a)

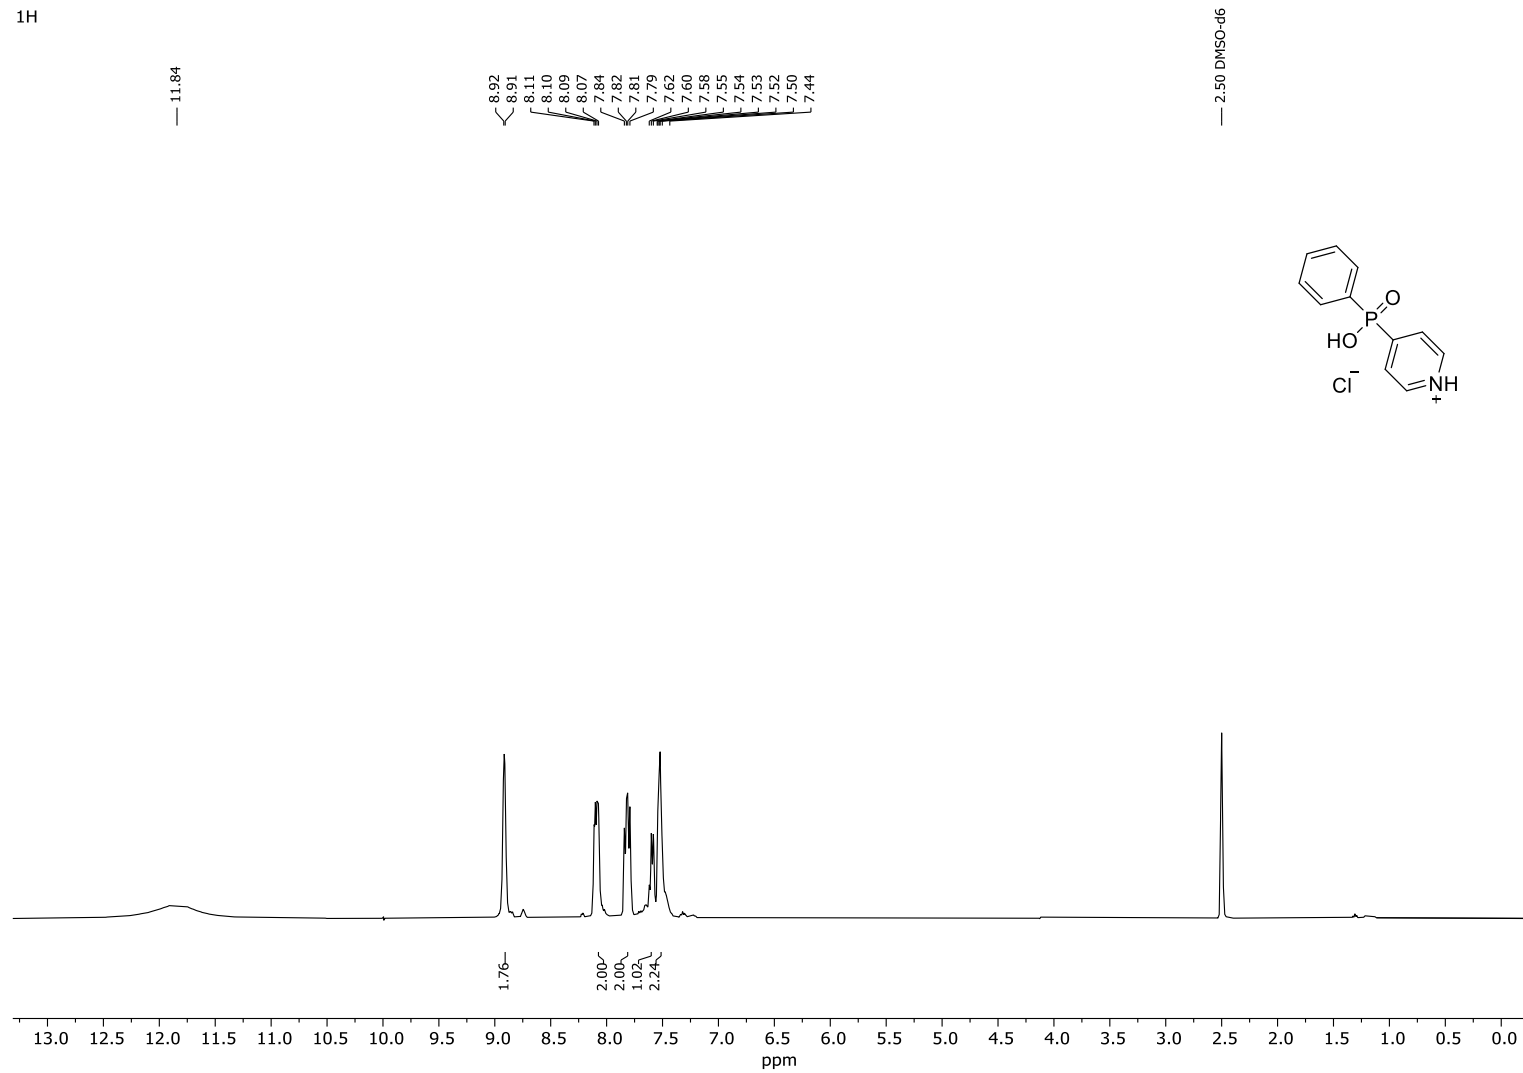

# 4-[Hydroxy(phenyl)phosphoryl]pyridin-1-ium chloride (5a)

<sup>13</sup>C

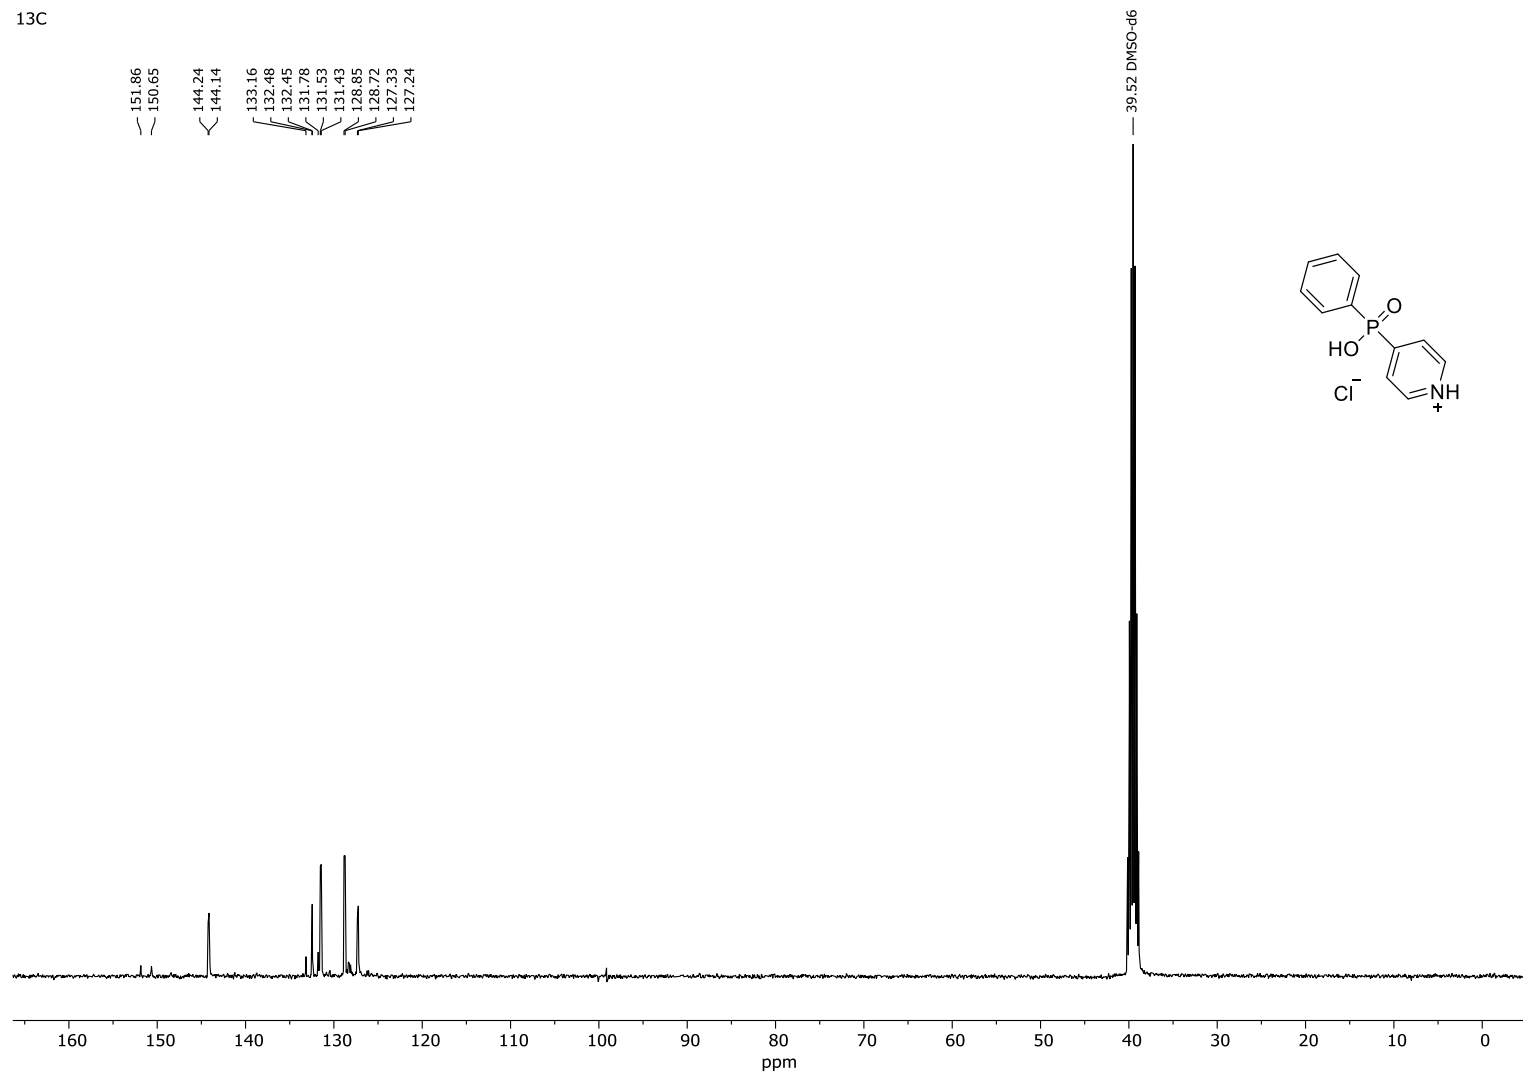

# 4-[Hydroxy(phenyl)phosphoryl]pyridin-1-ium chloride (5a)

1H-15N HMBC

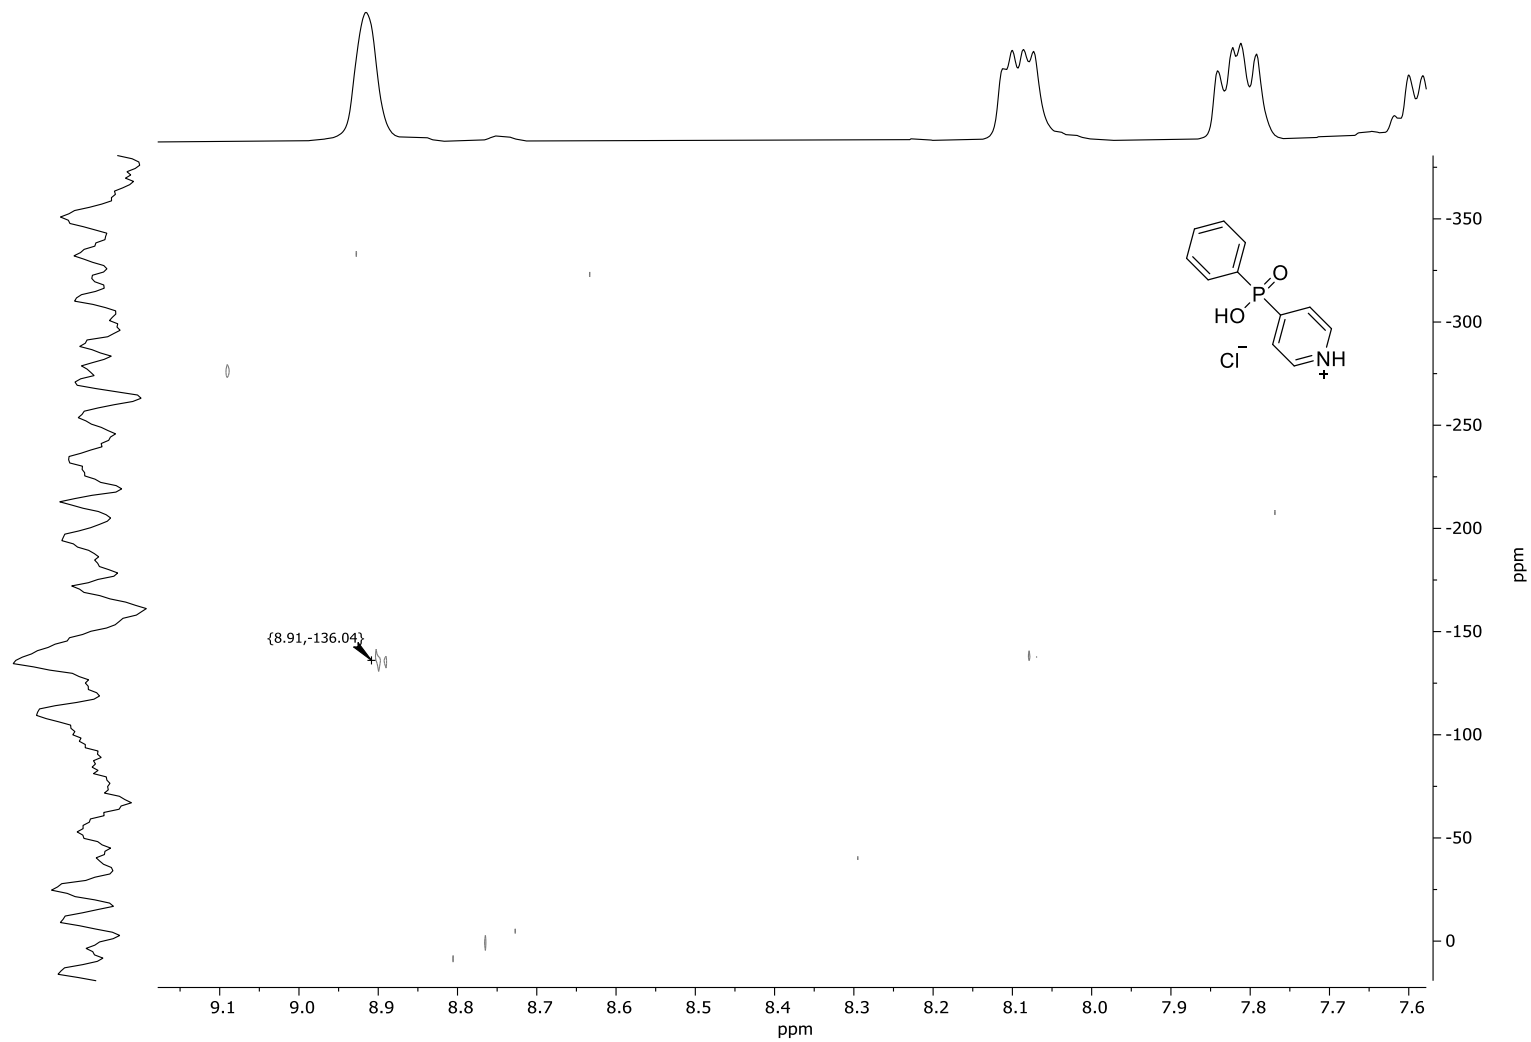

4-[Hydroxy(phenyl)phosphoryl]pyridin-1-ium chloride (5a)

31P

18.88

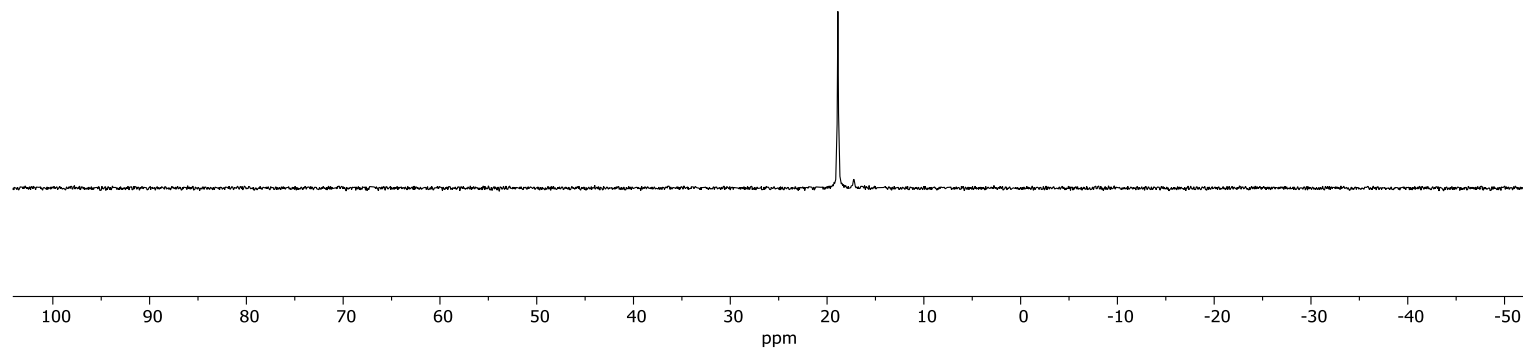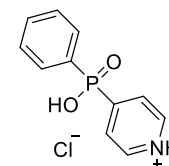

# 4-[Hydroxy(phenyl)phosphoryl]-3-methylpyridin-1-ium chloride (5b)

<sup>1</sup>H

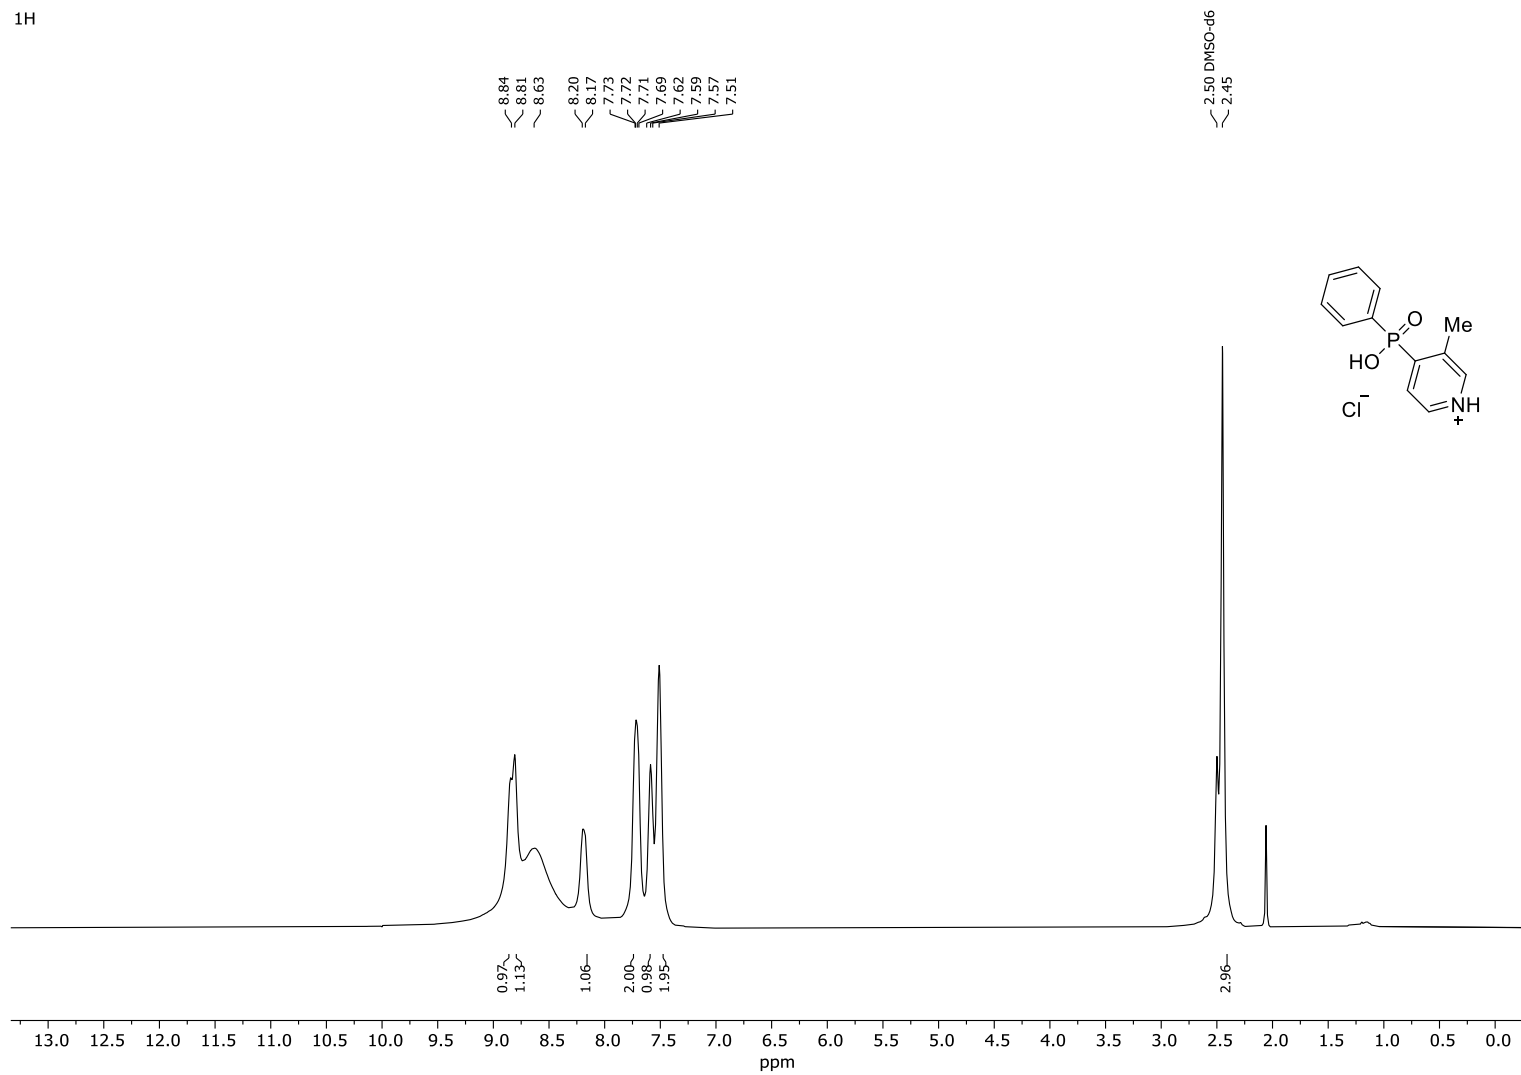

# 4-[Hydroxy(phenyl)phosphoryl]-3-methylpyridin-1-ium chloride (5b)

13C

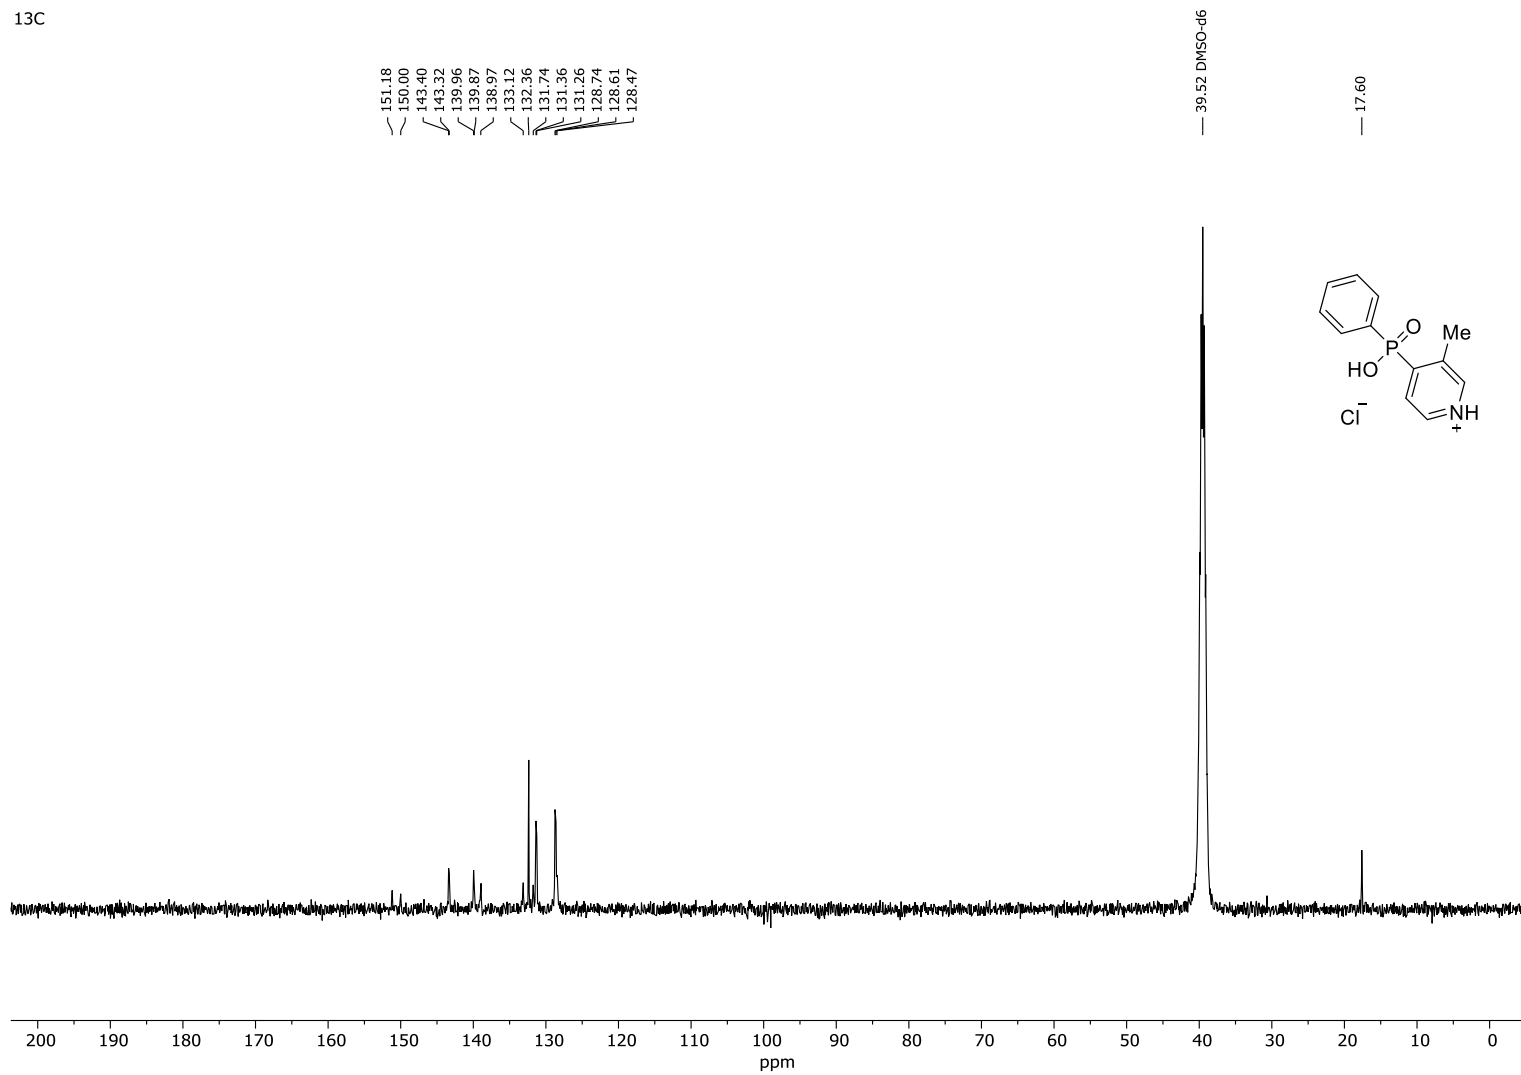



4-[Hydroxy(phenyl)phosphoryl]-3-methylpyridin-1-ium chloride (5b)

31P

19.20

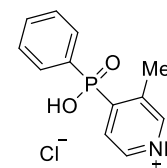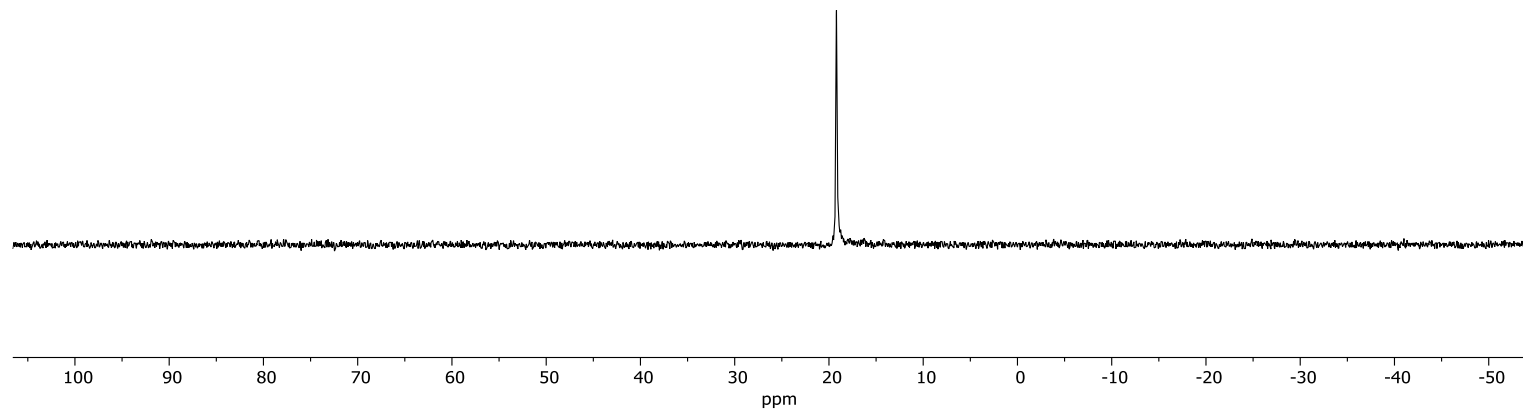

## 2. IR Spectra

### Ethyl phenyl(pyridin-4-yl)phosphinate (3aa)

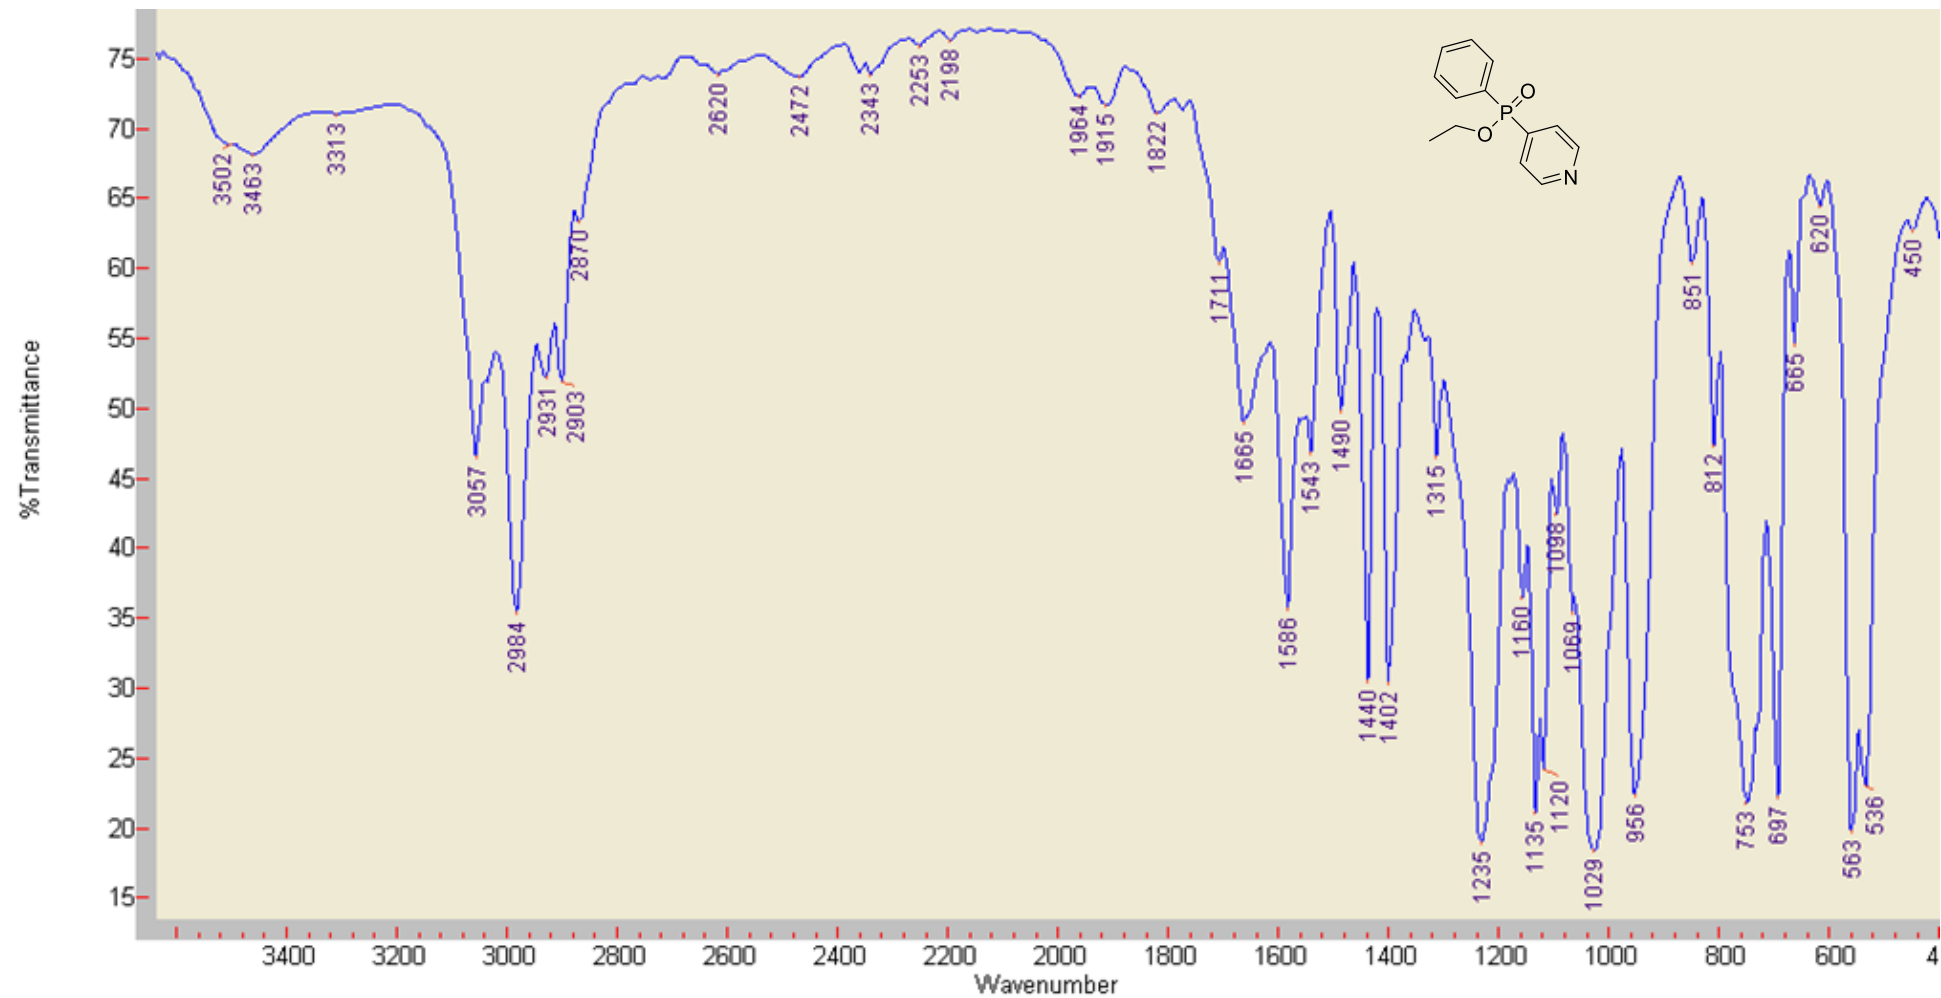

**Ethyl (3-methylpyridin-4-yl)phenylphosphinate (3ba)**

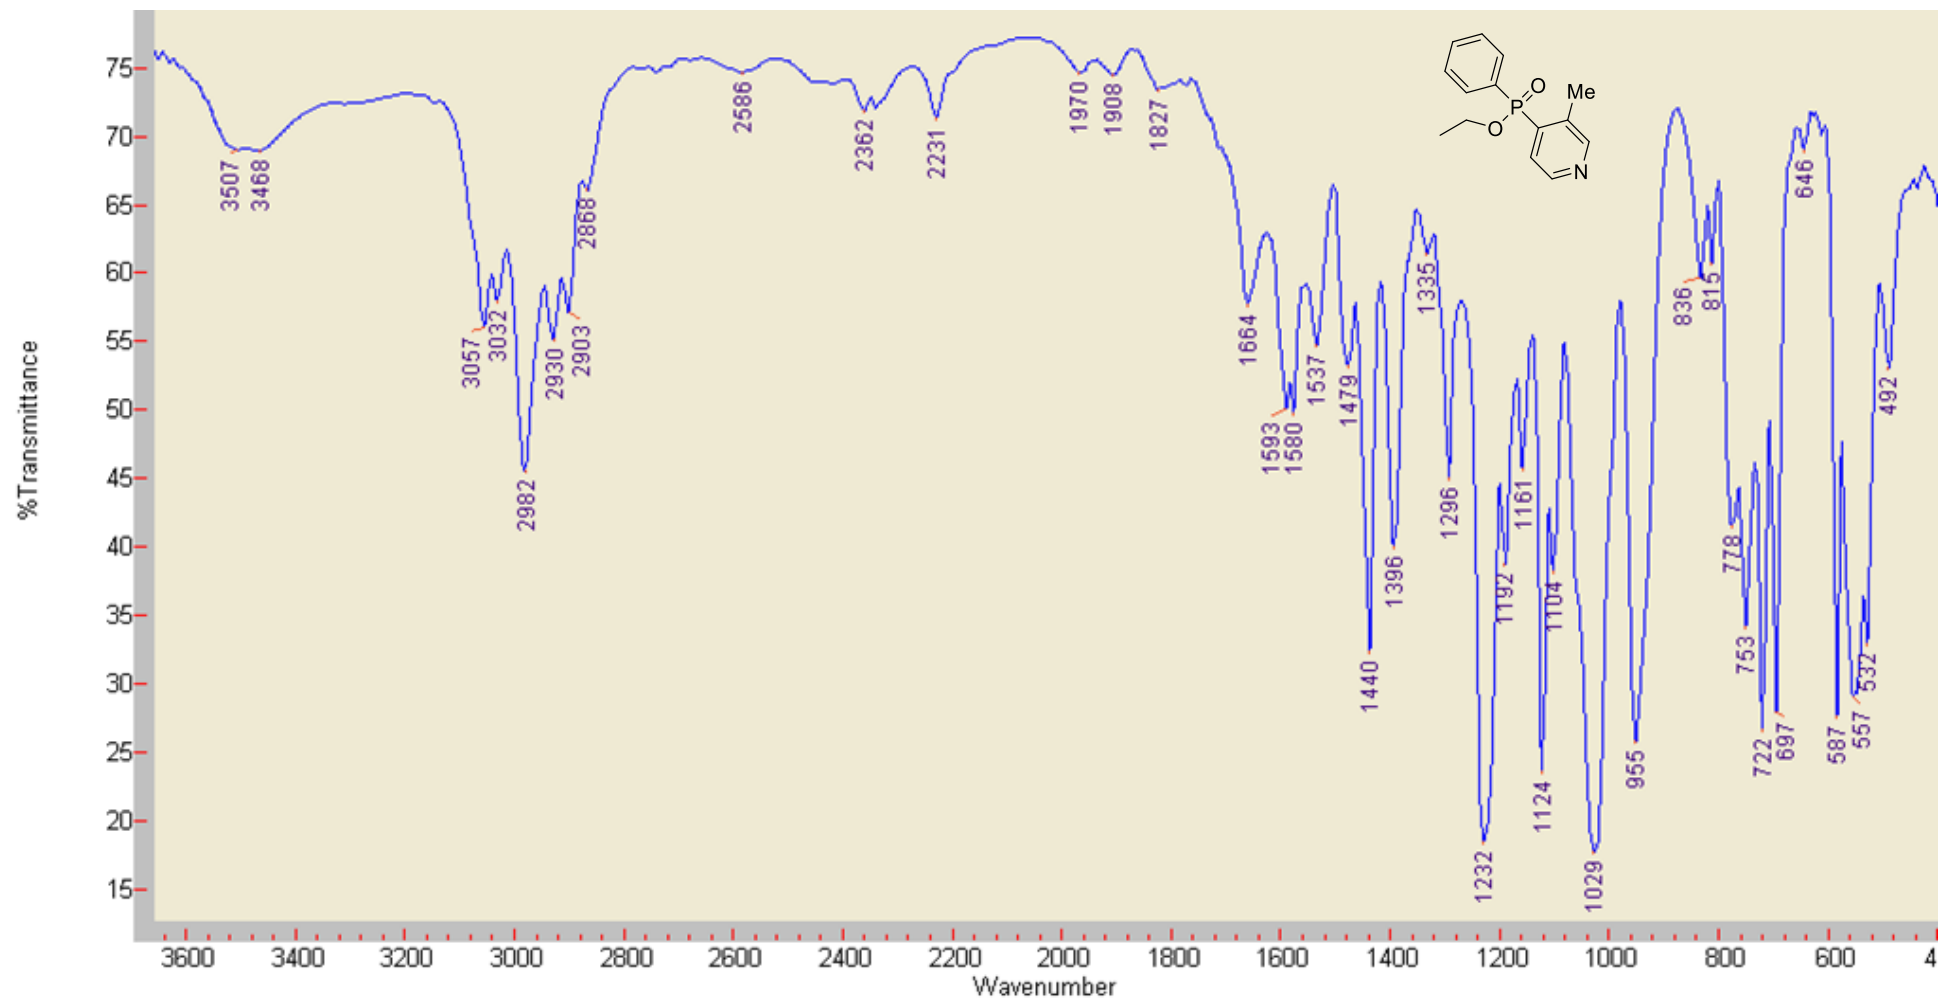

**Ethyl (3-fluoropyridin-4-yl)phenylphosphinate (3ca)**

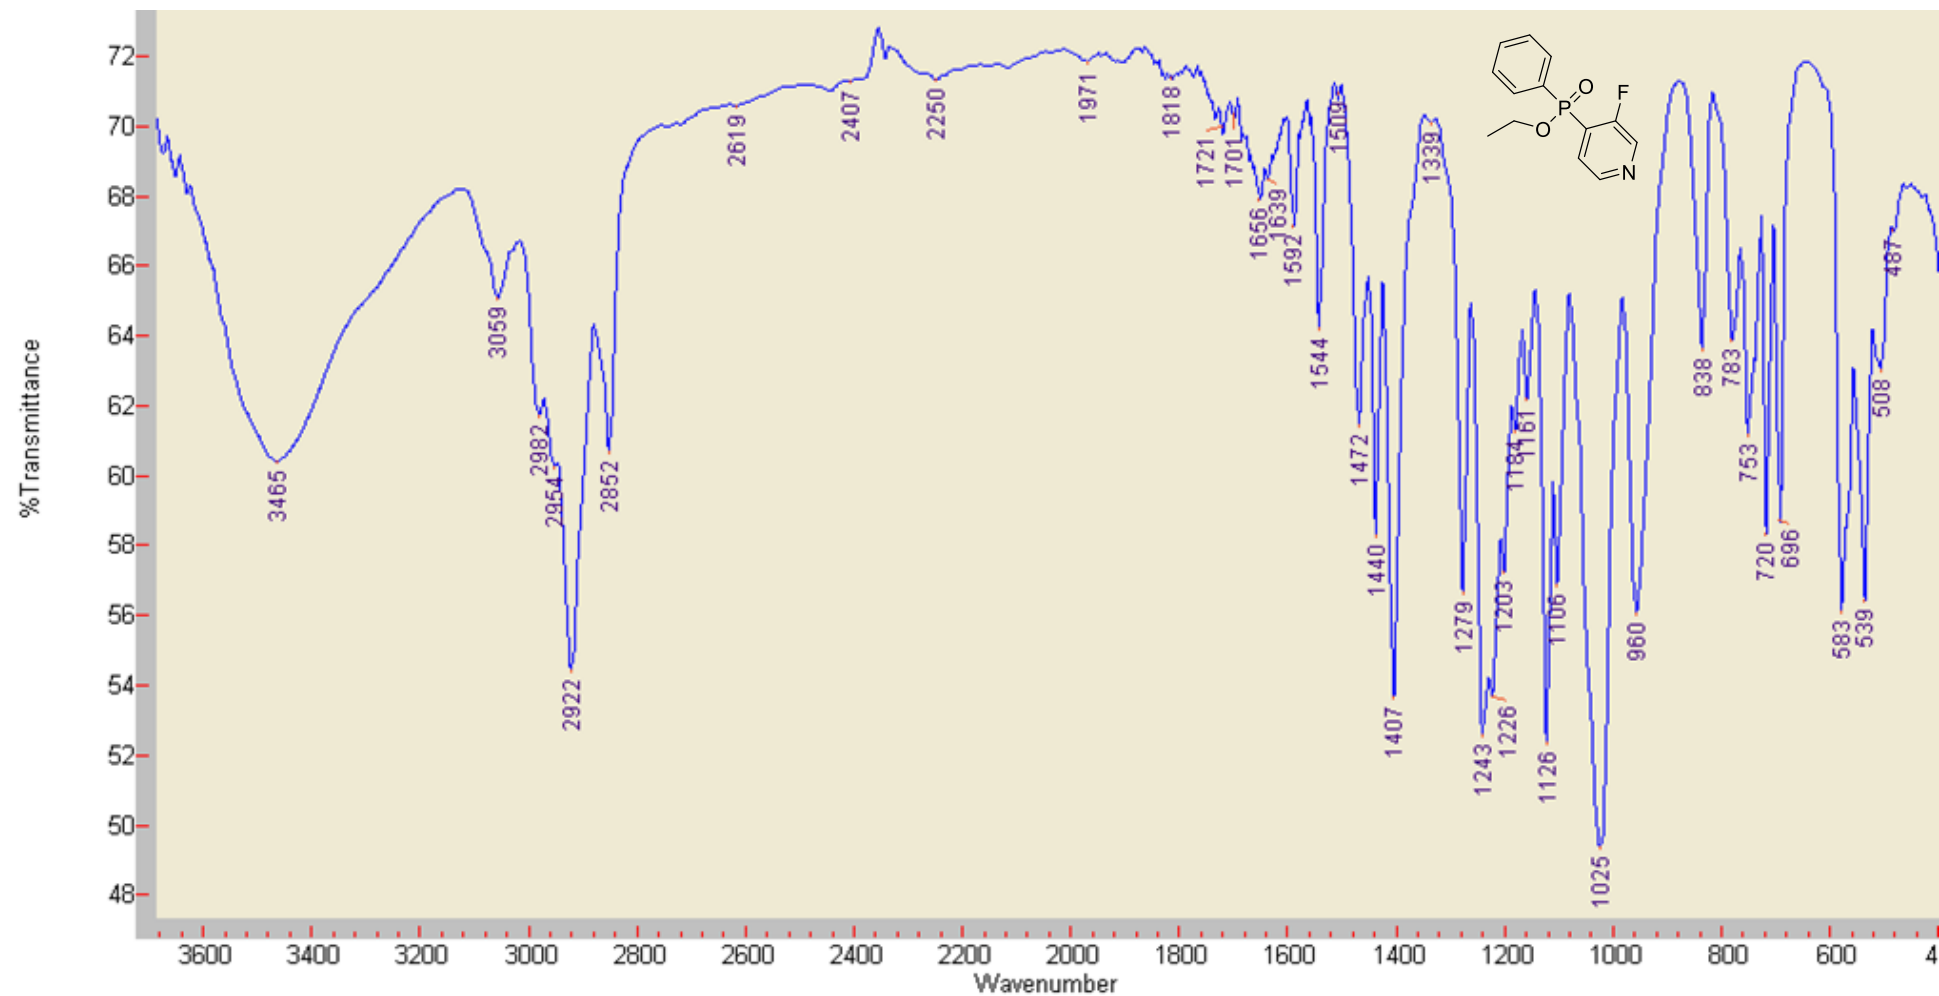

**Ethyl (3-chloropyridin-4-yl)phenylphosphinate (3da)**

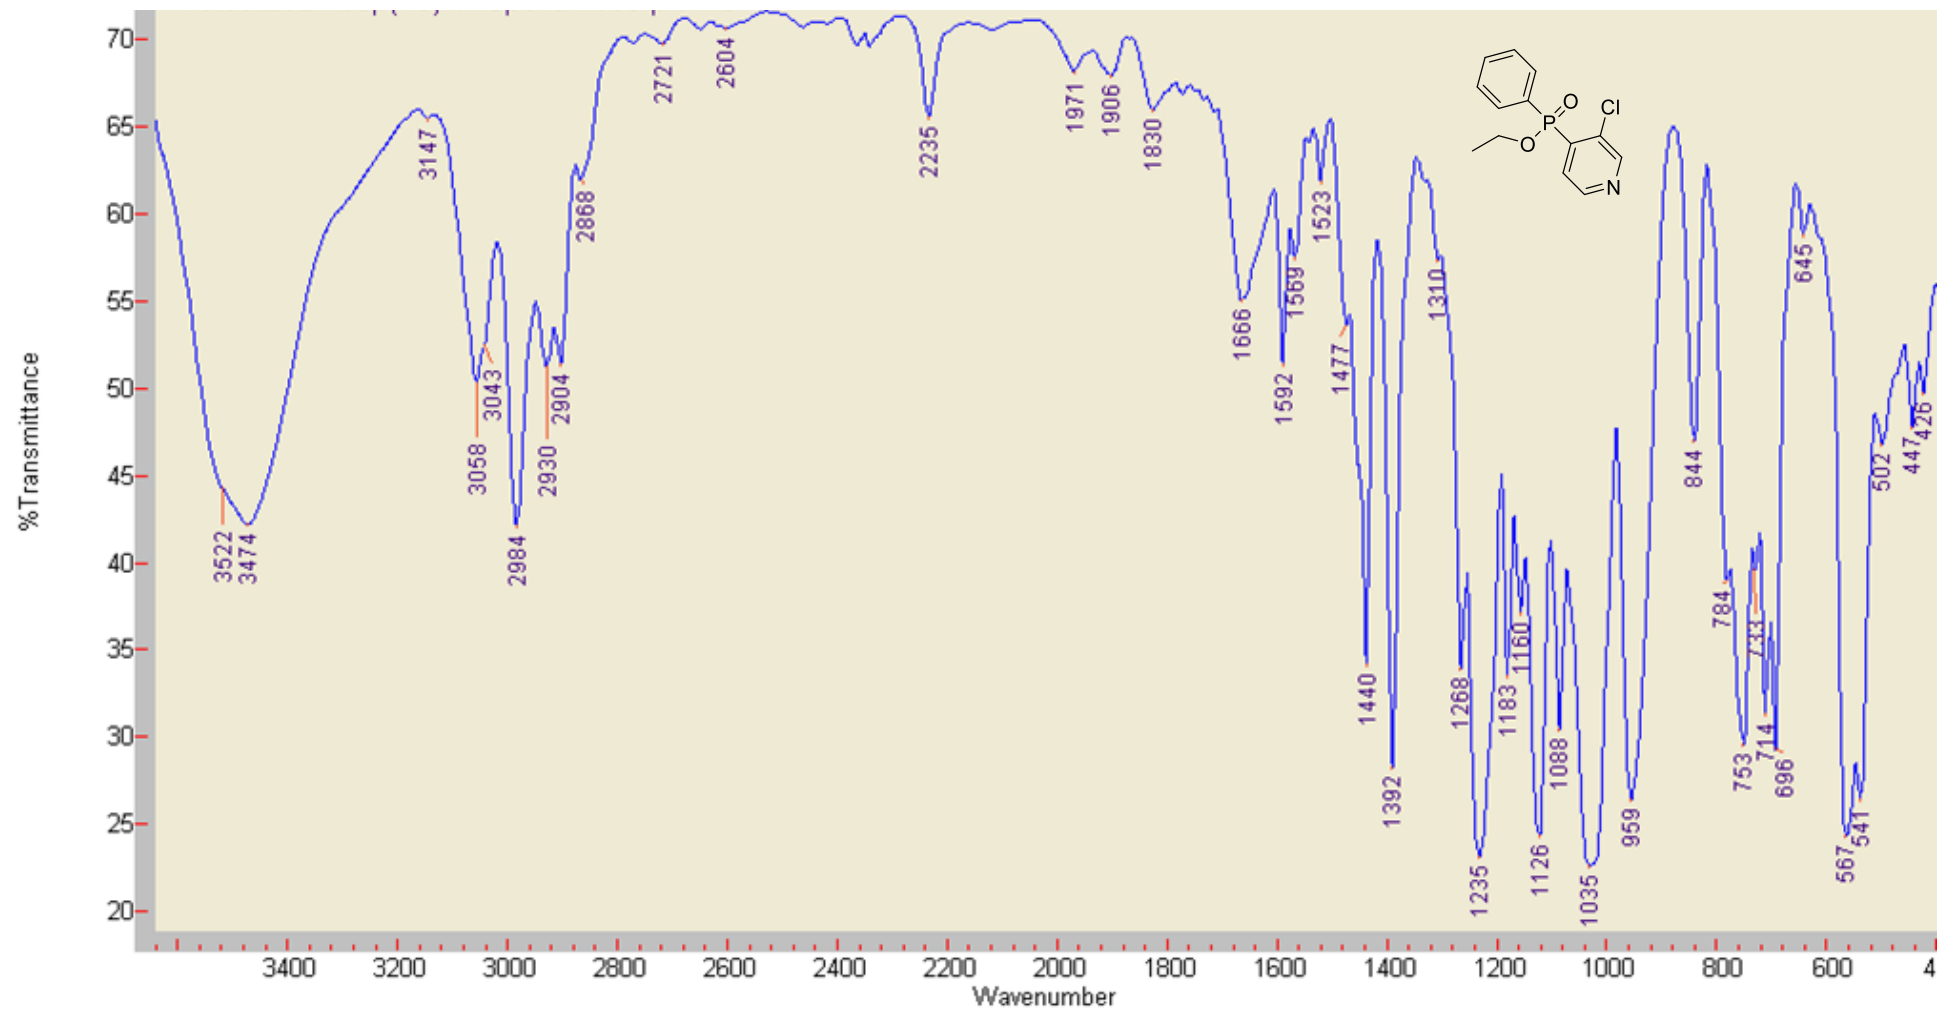

### Butyl phenyl(pyridin-4-yl)phosphinate (3ab)

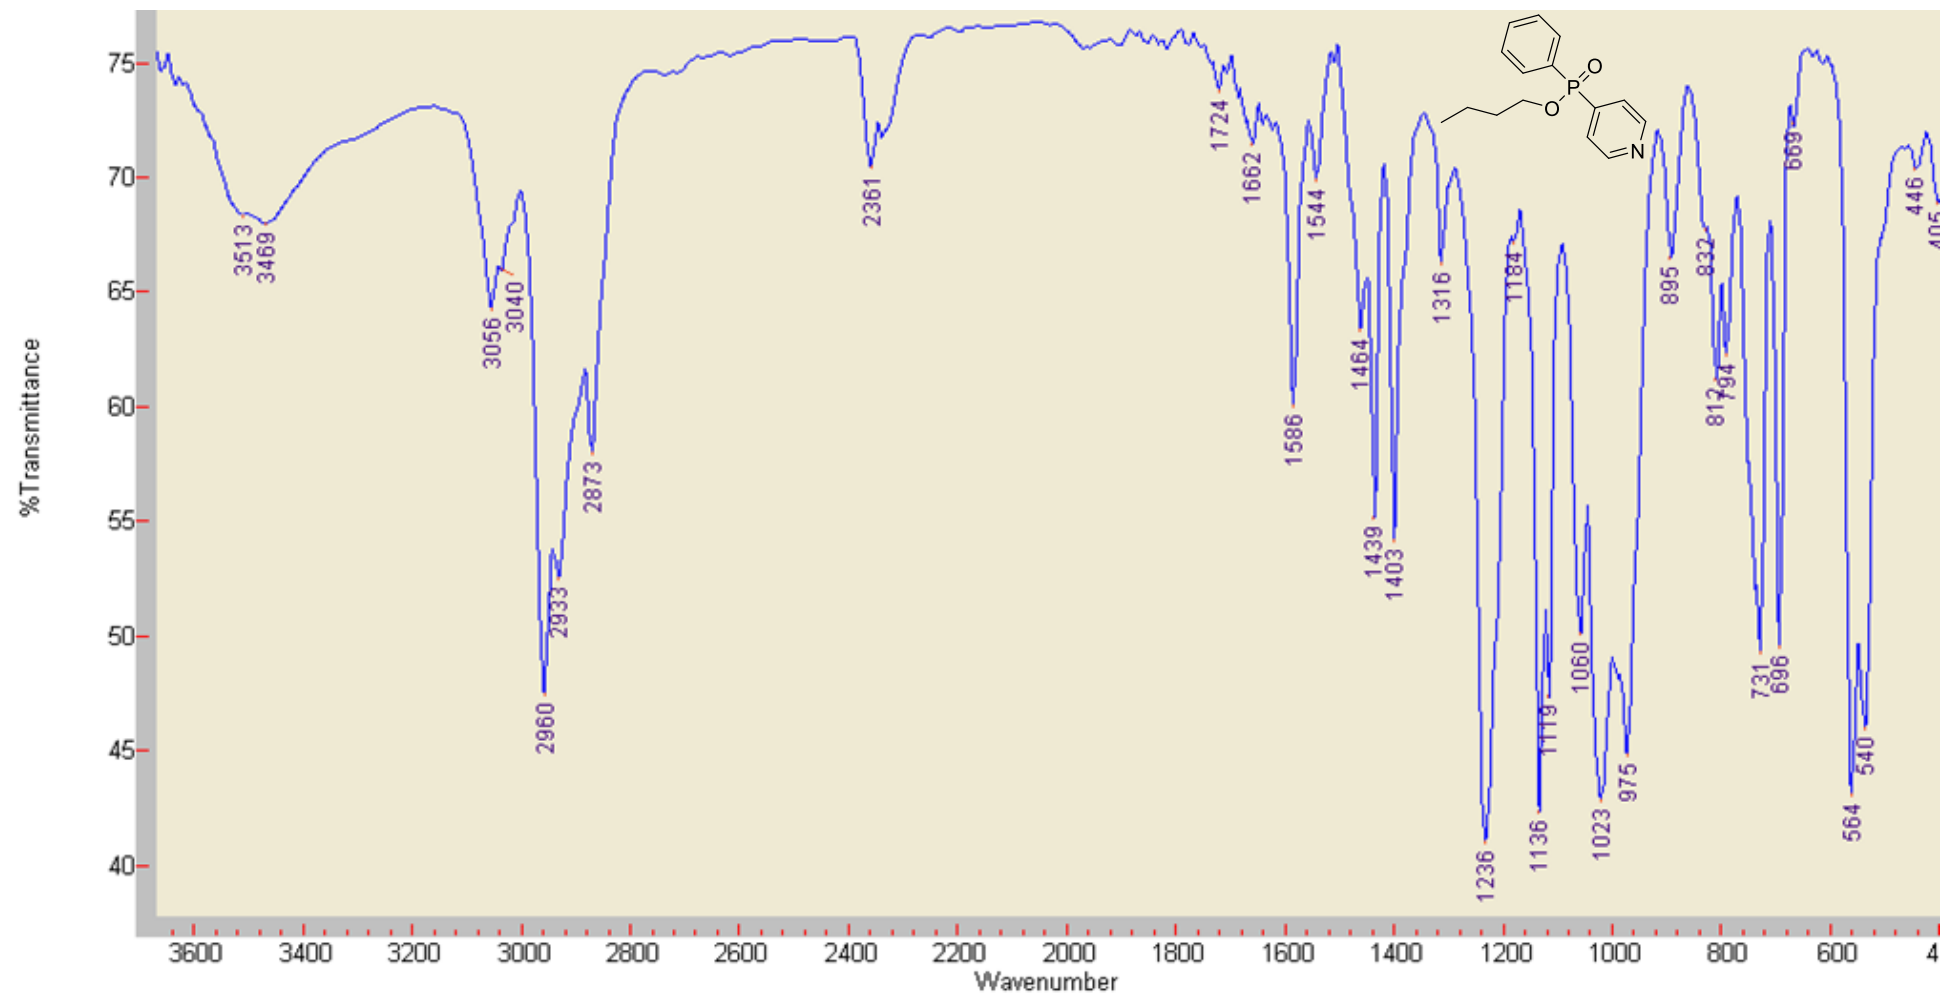

**Butyl (3-methylpyridin-4-yl)phenylphosphinate (3bb)**

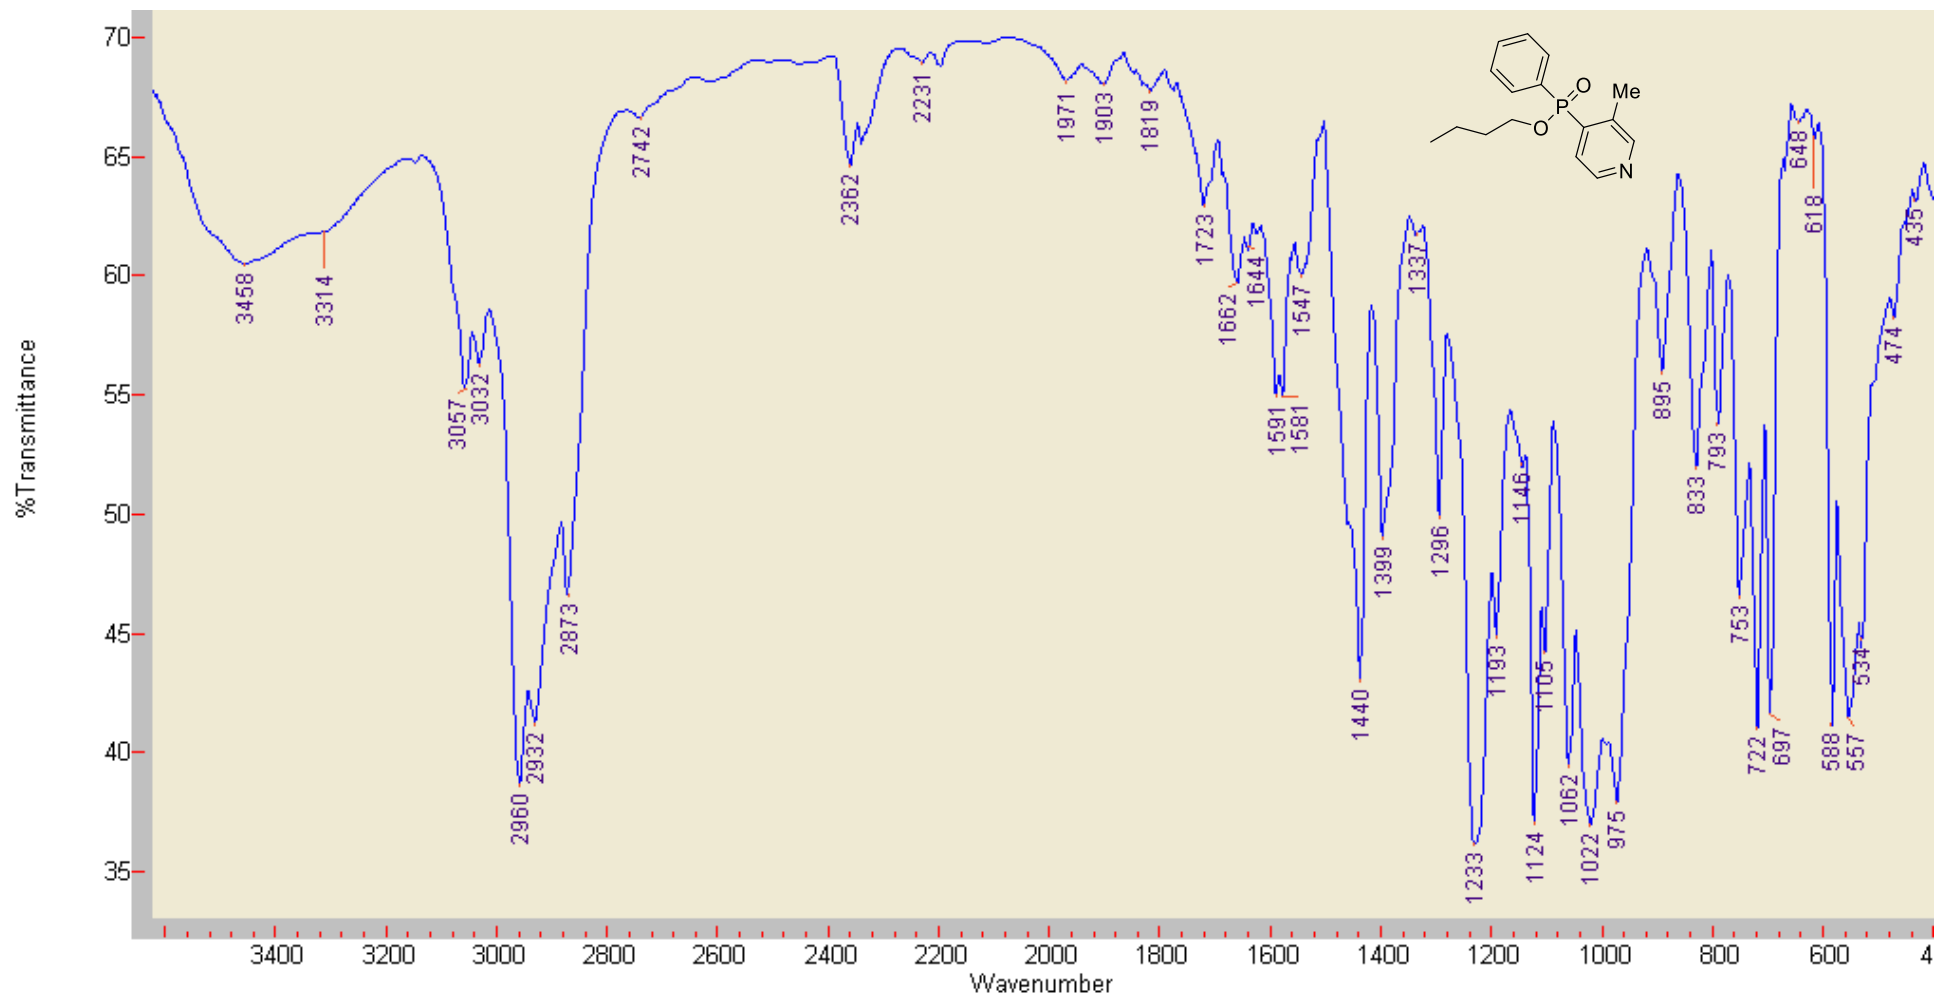

**Butyl (3-fluoropyridin-4-yl)phenylphosphinate (3cb)**

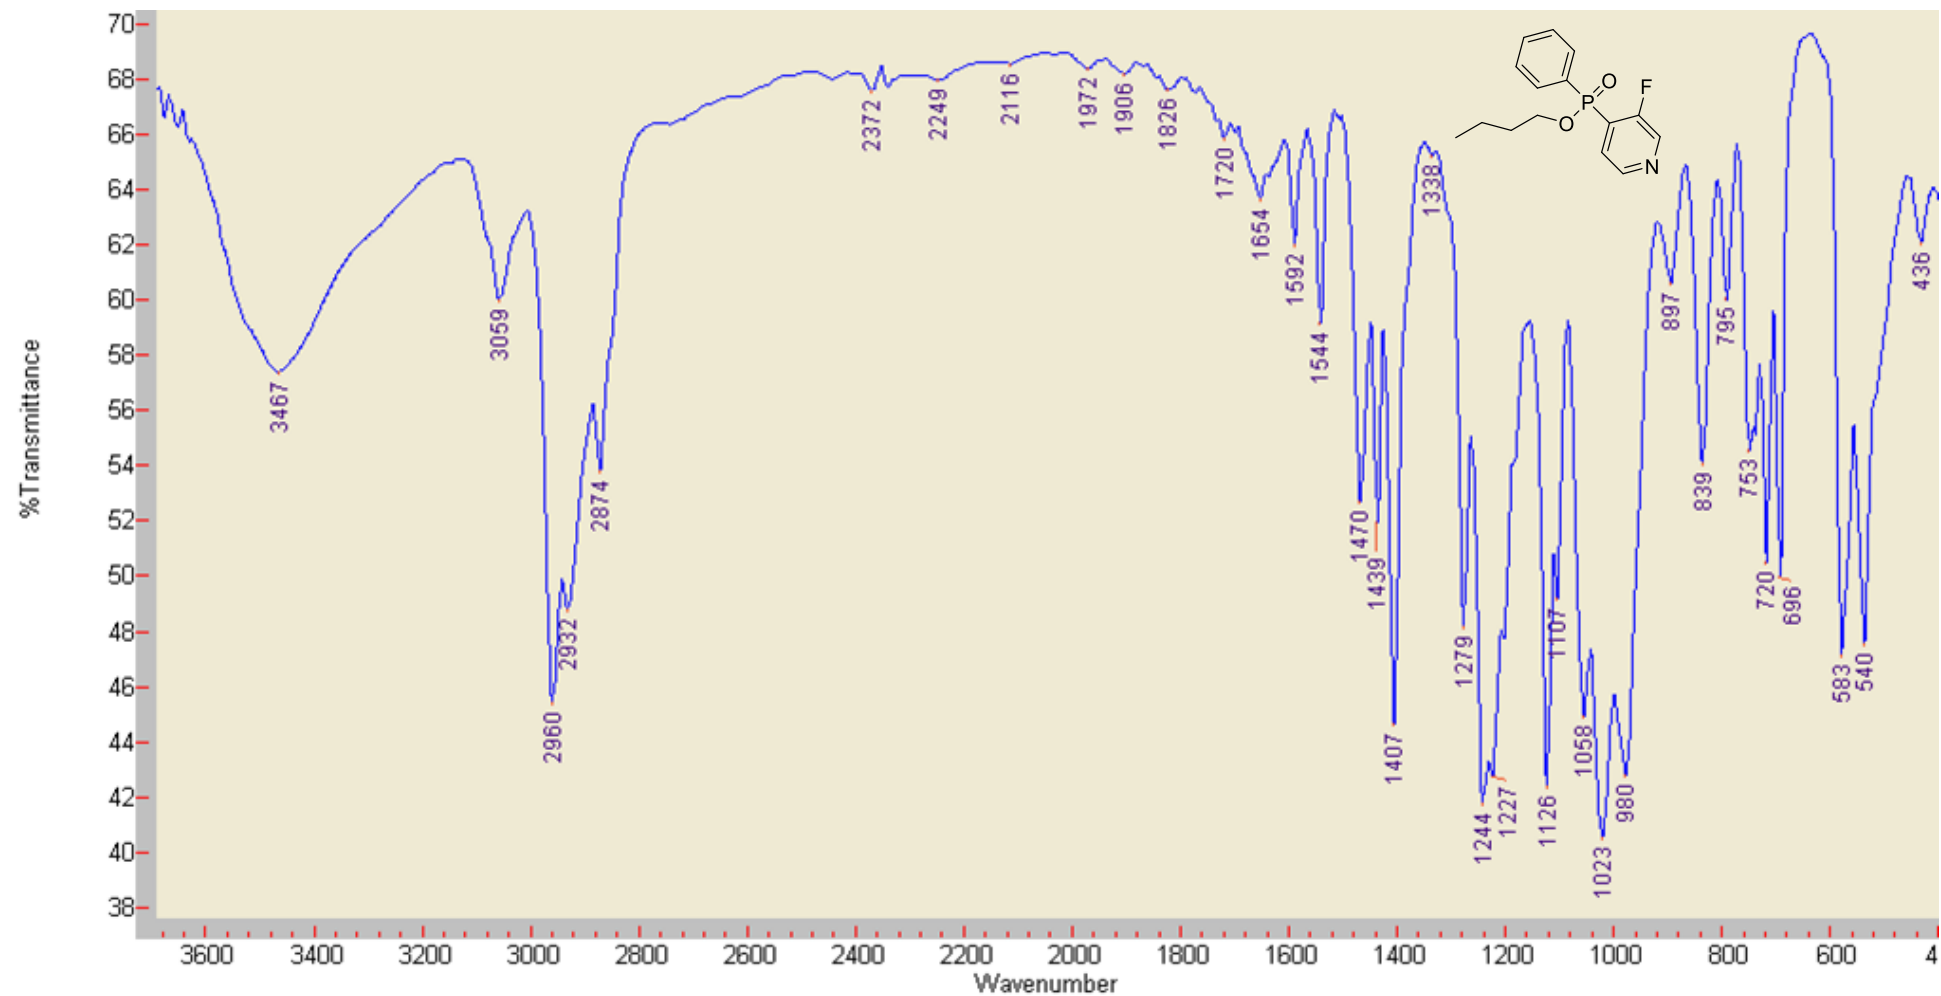



**Butyl (3-chloropyridin-4-yl)phenylphosphinate (3db)**

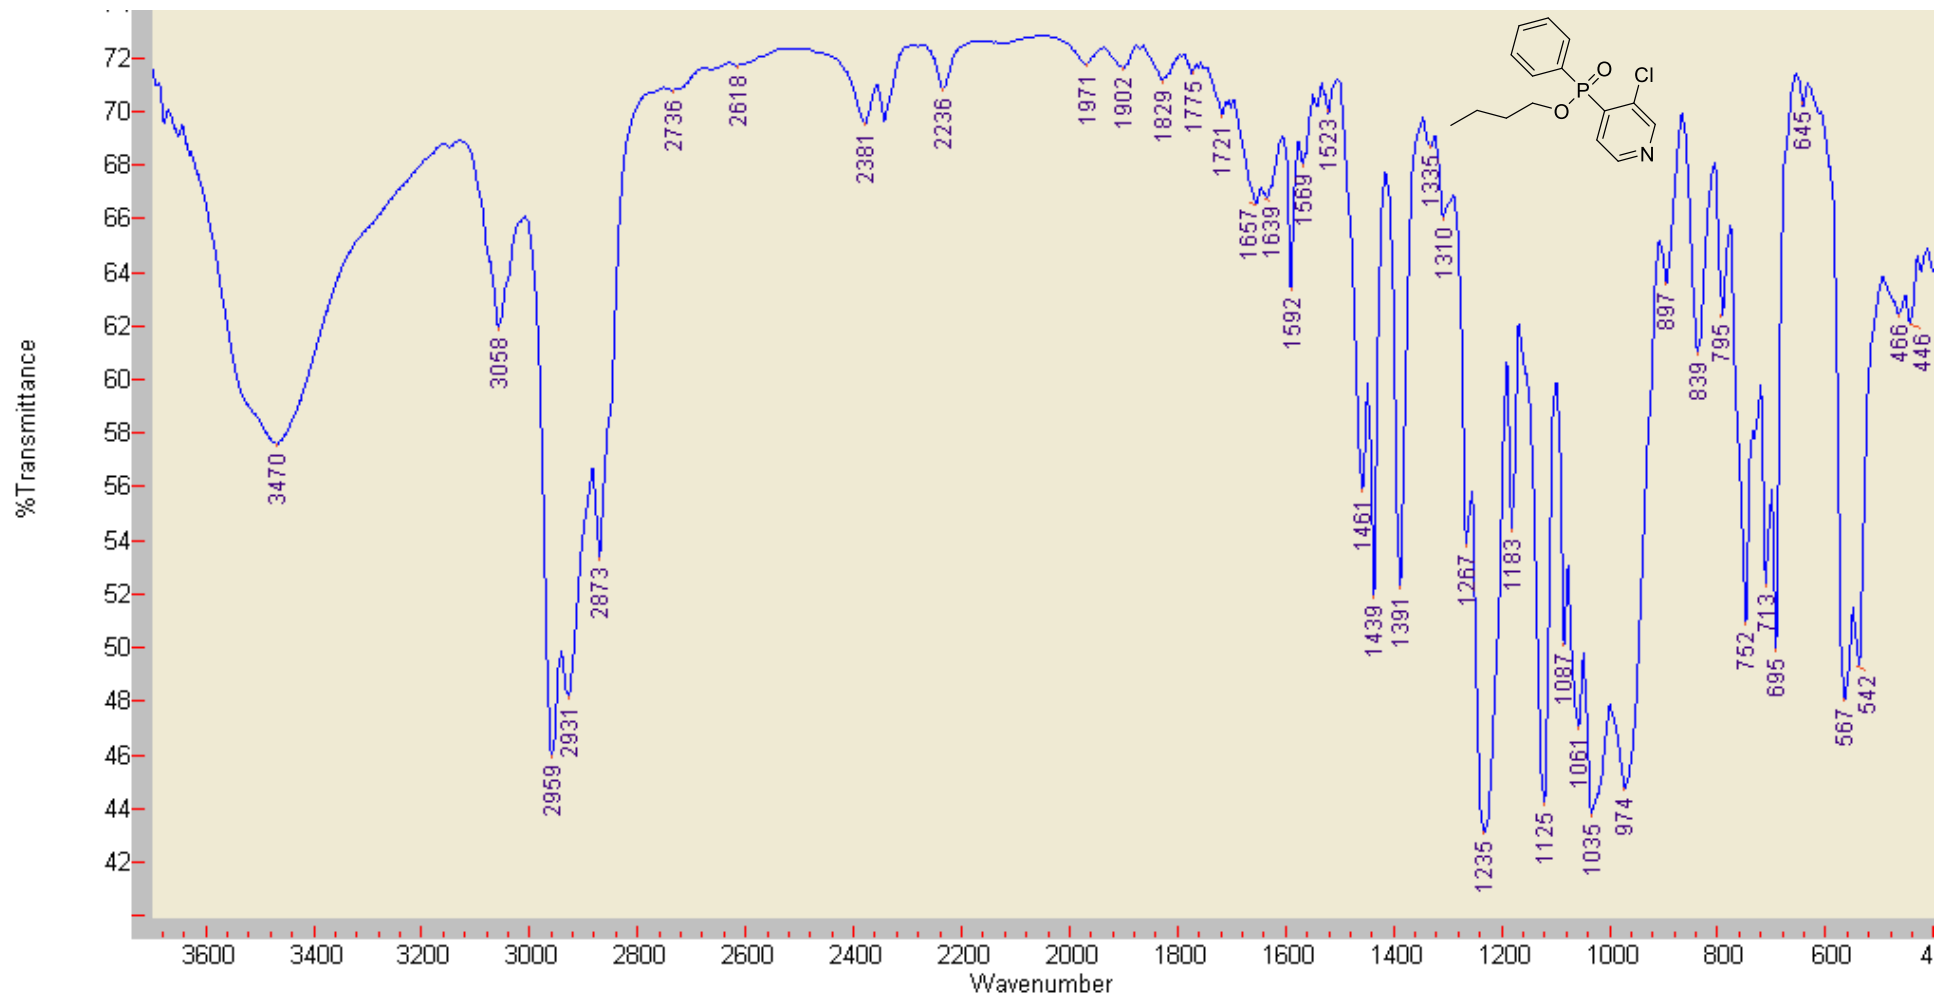

## 2-Methylpropyl phenyl(pyridin-4-yl)phosphinate (3ac)

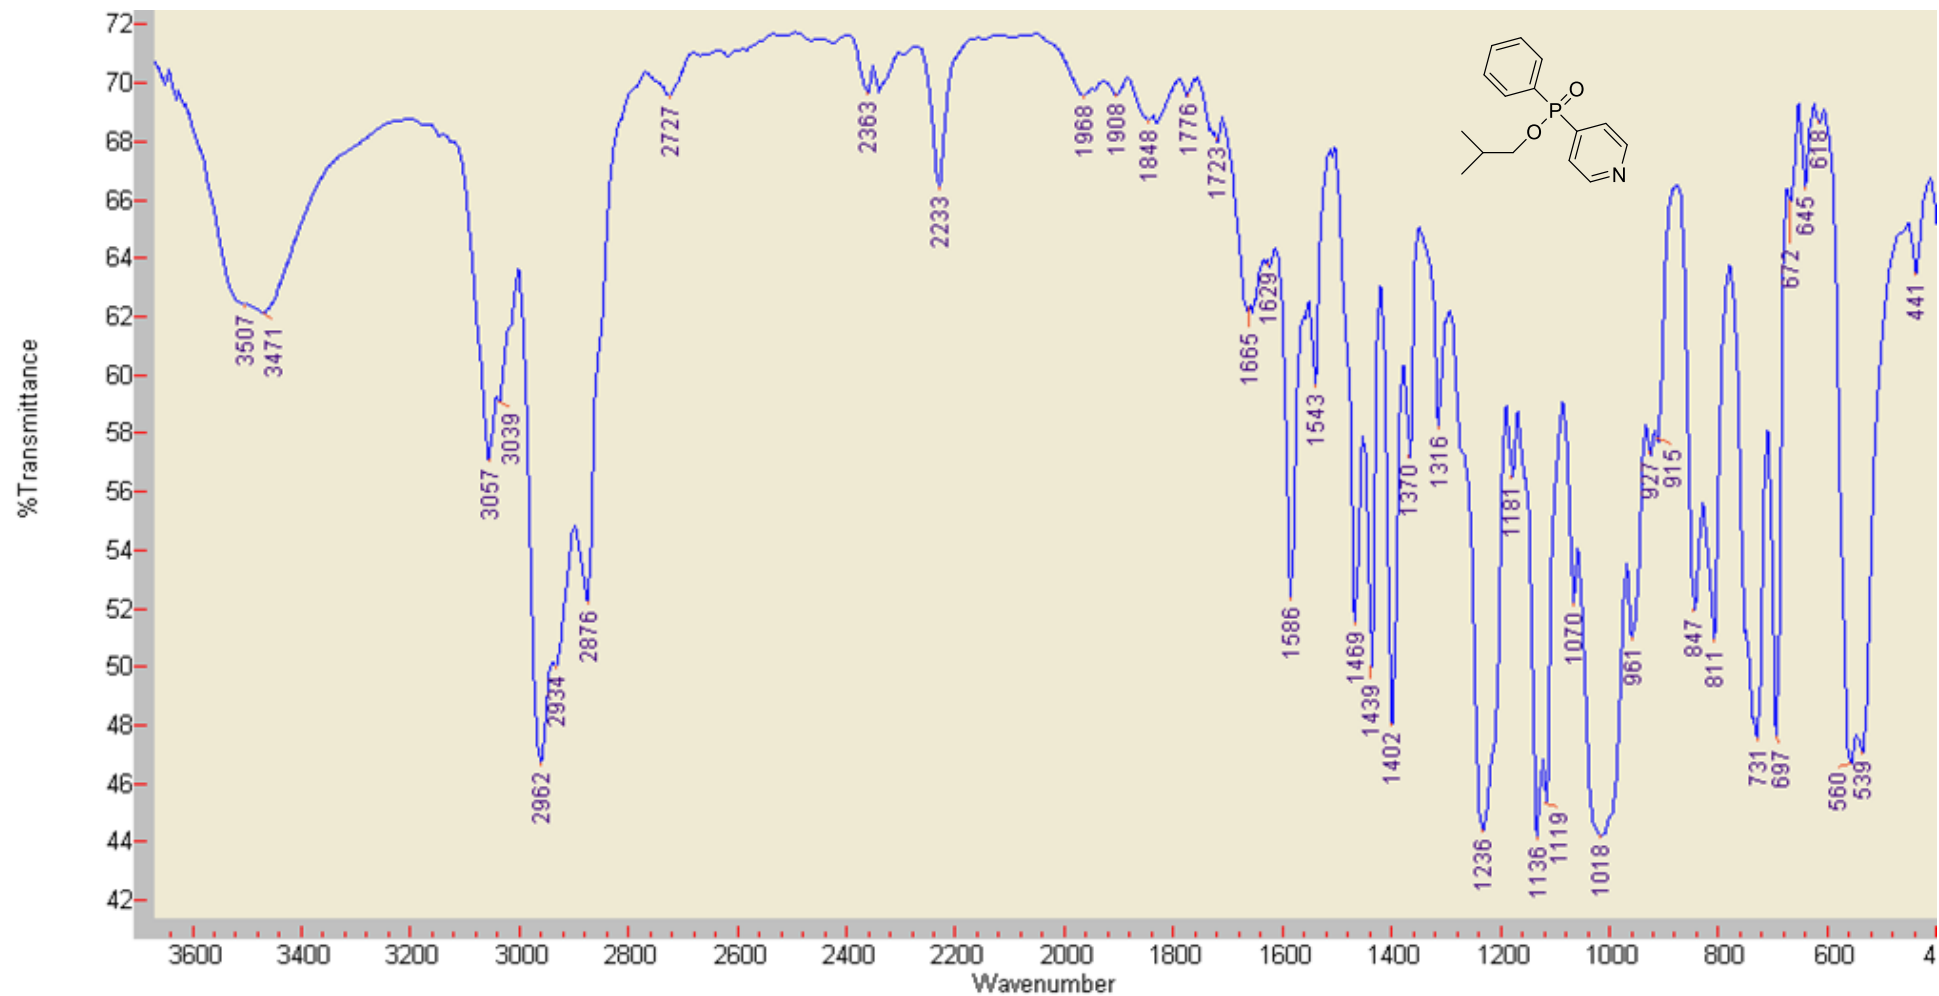

## 2-Methylpropyl (3-methylpyridin-4-yl)phenylphosphinate (3bc)

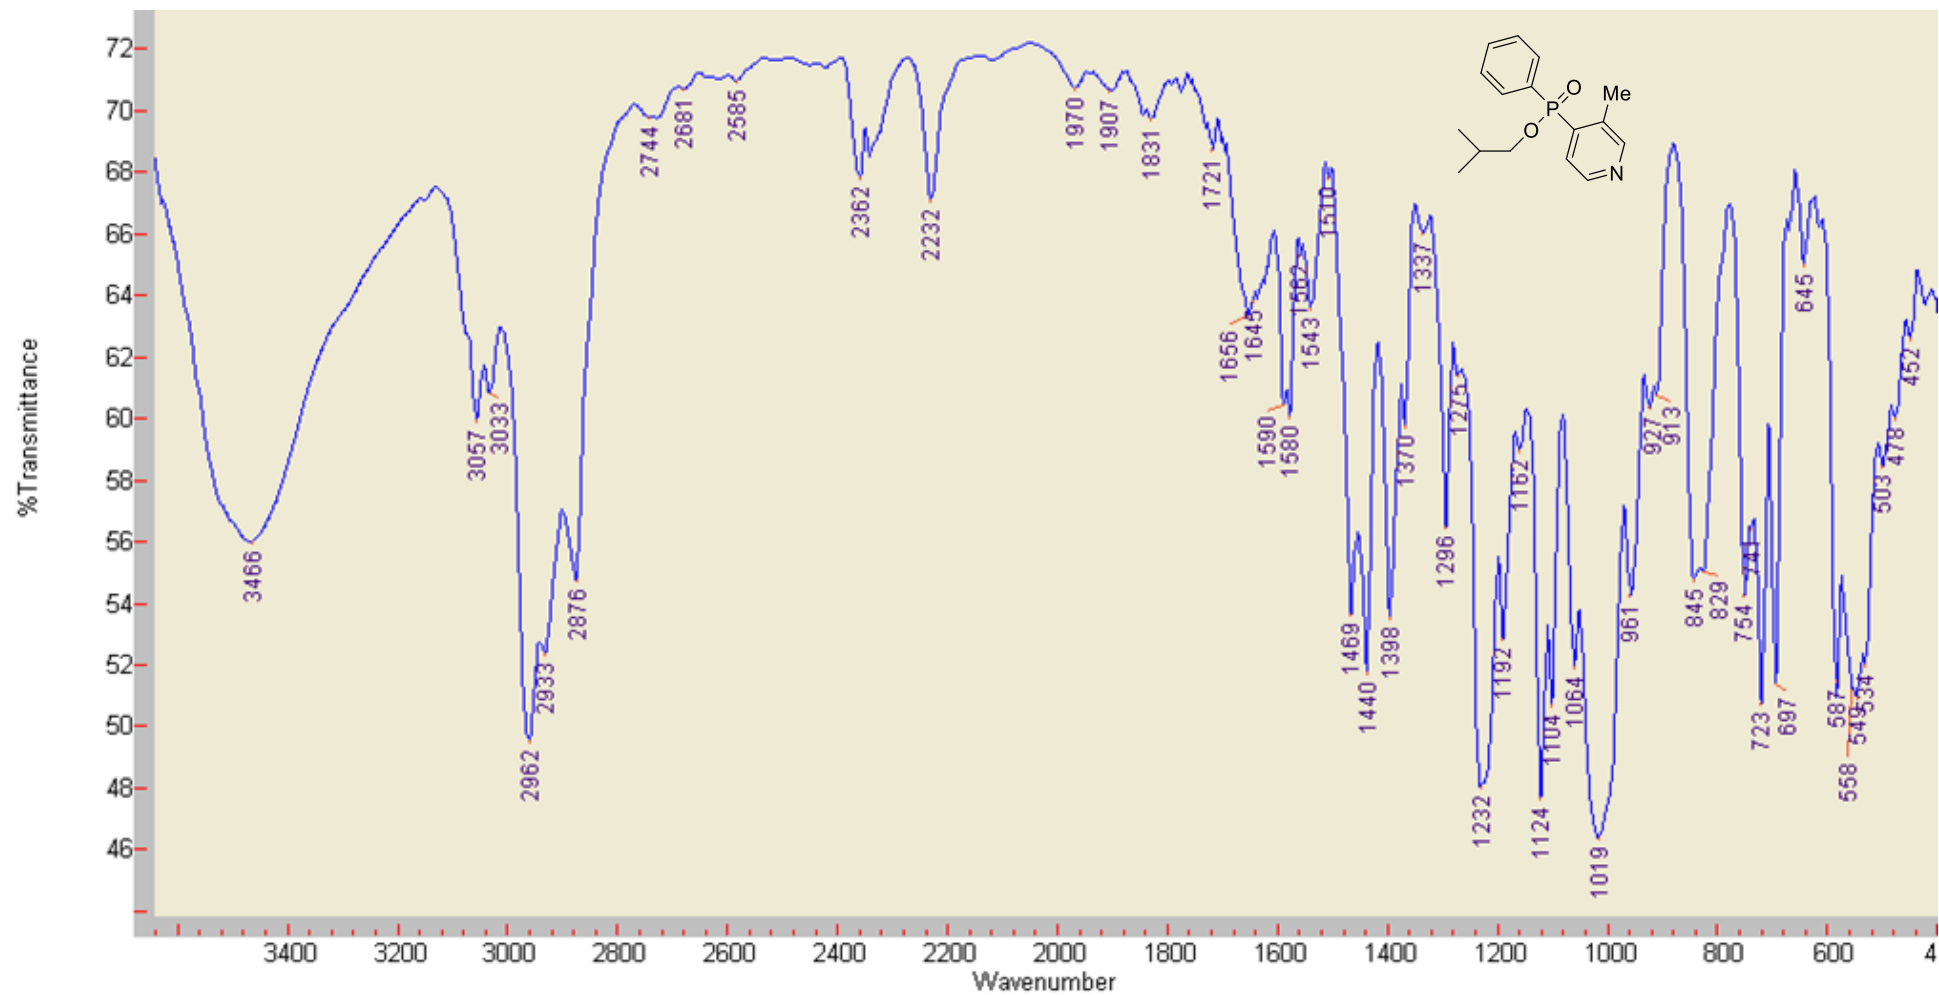

### Hexyl phenyl(pyridin-4-yl)phosphinate (3ad)

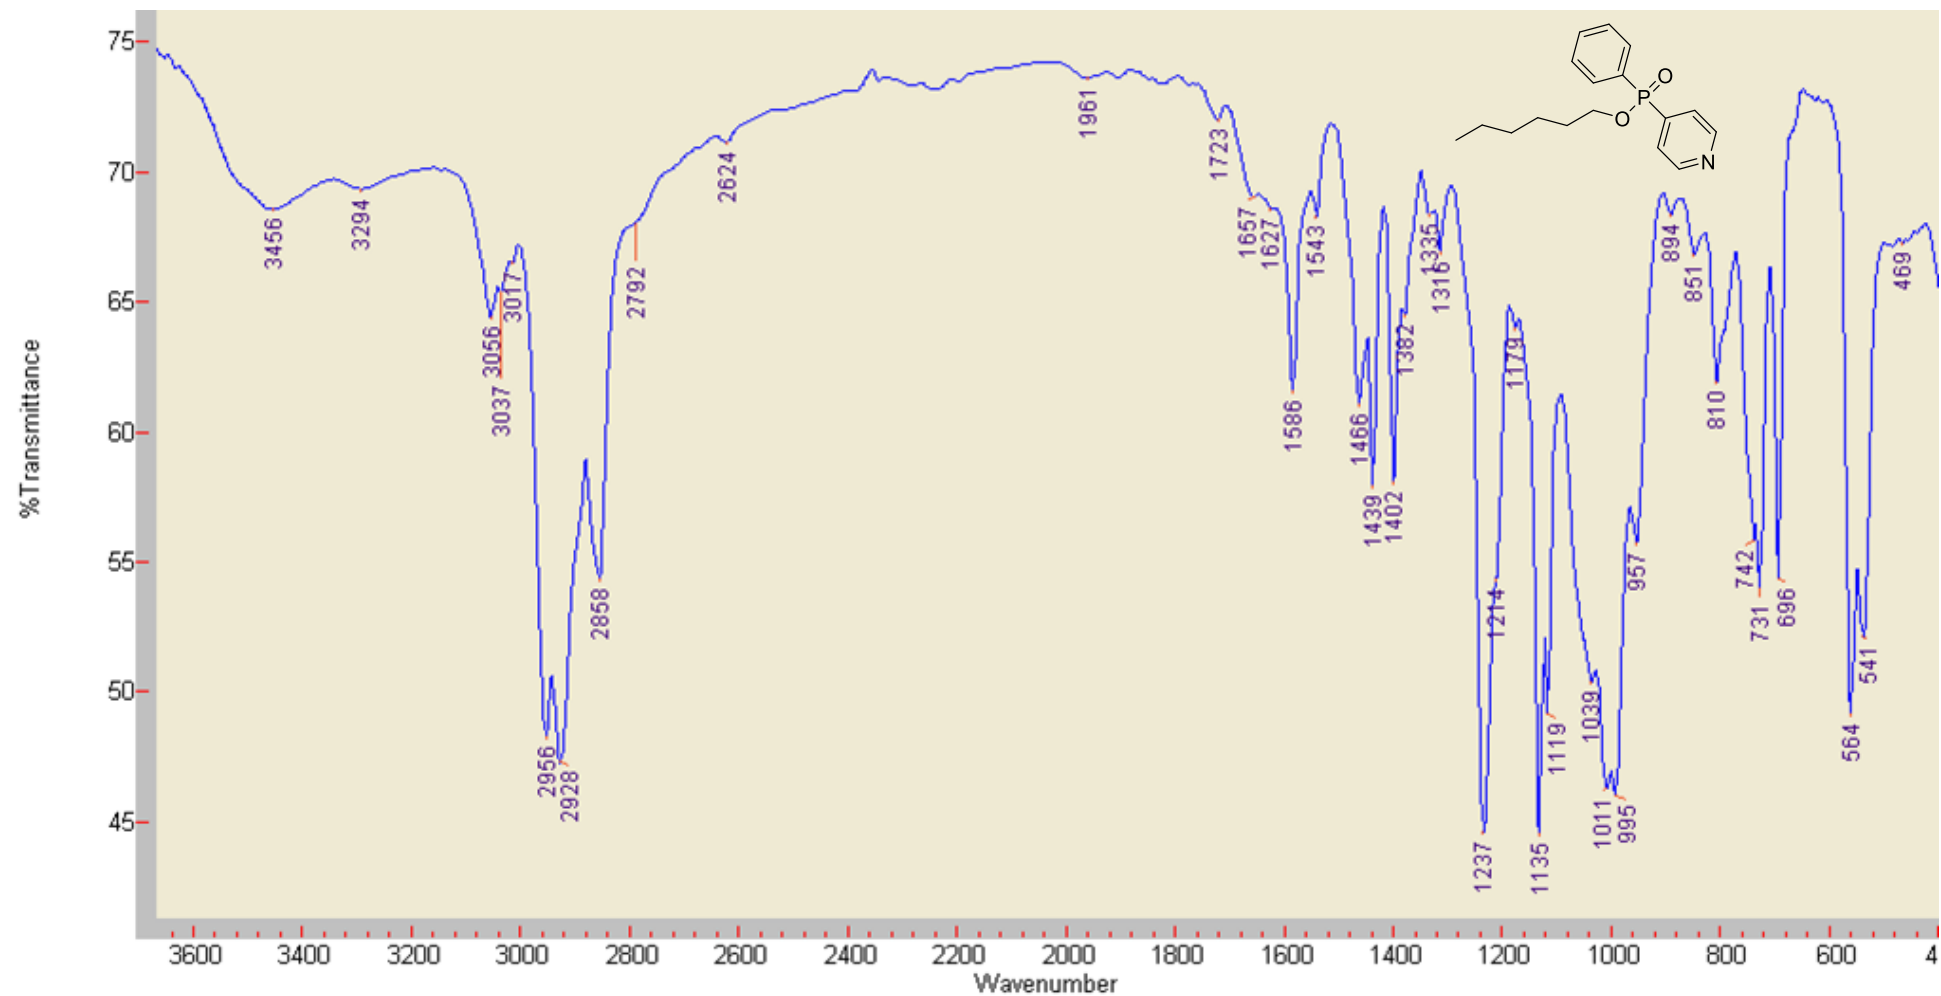

### Hexyl (3-methylpyridin-4-yl)phenylphosphinate (3bd)

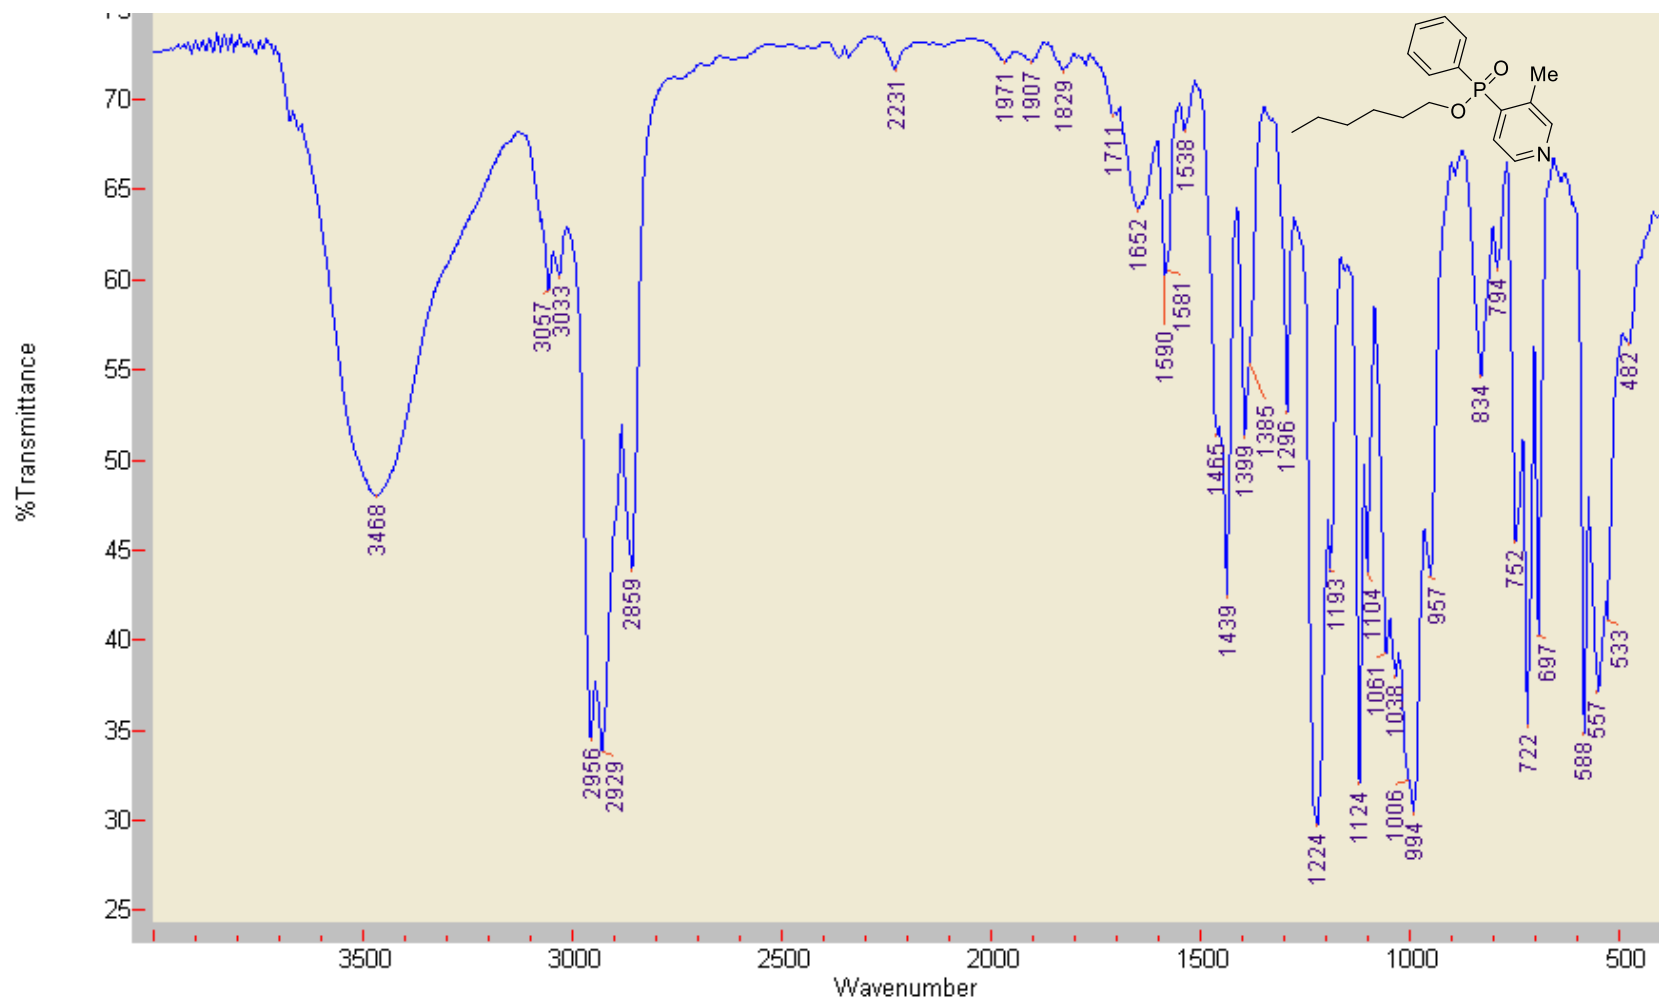

**Prop-2-en-1-yl phenyl(pyridin-4-yl)phosphinate (3ae)**

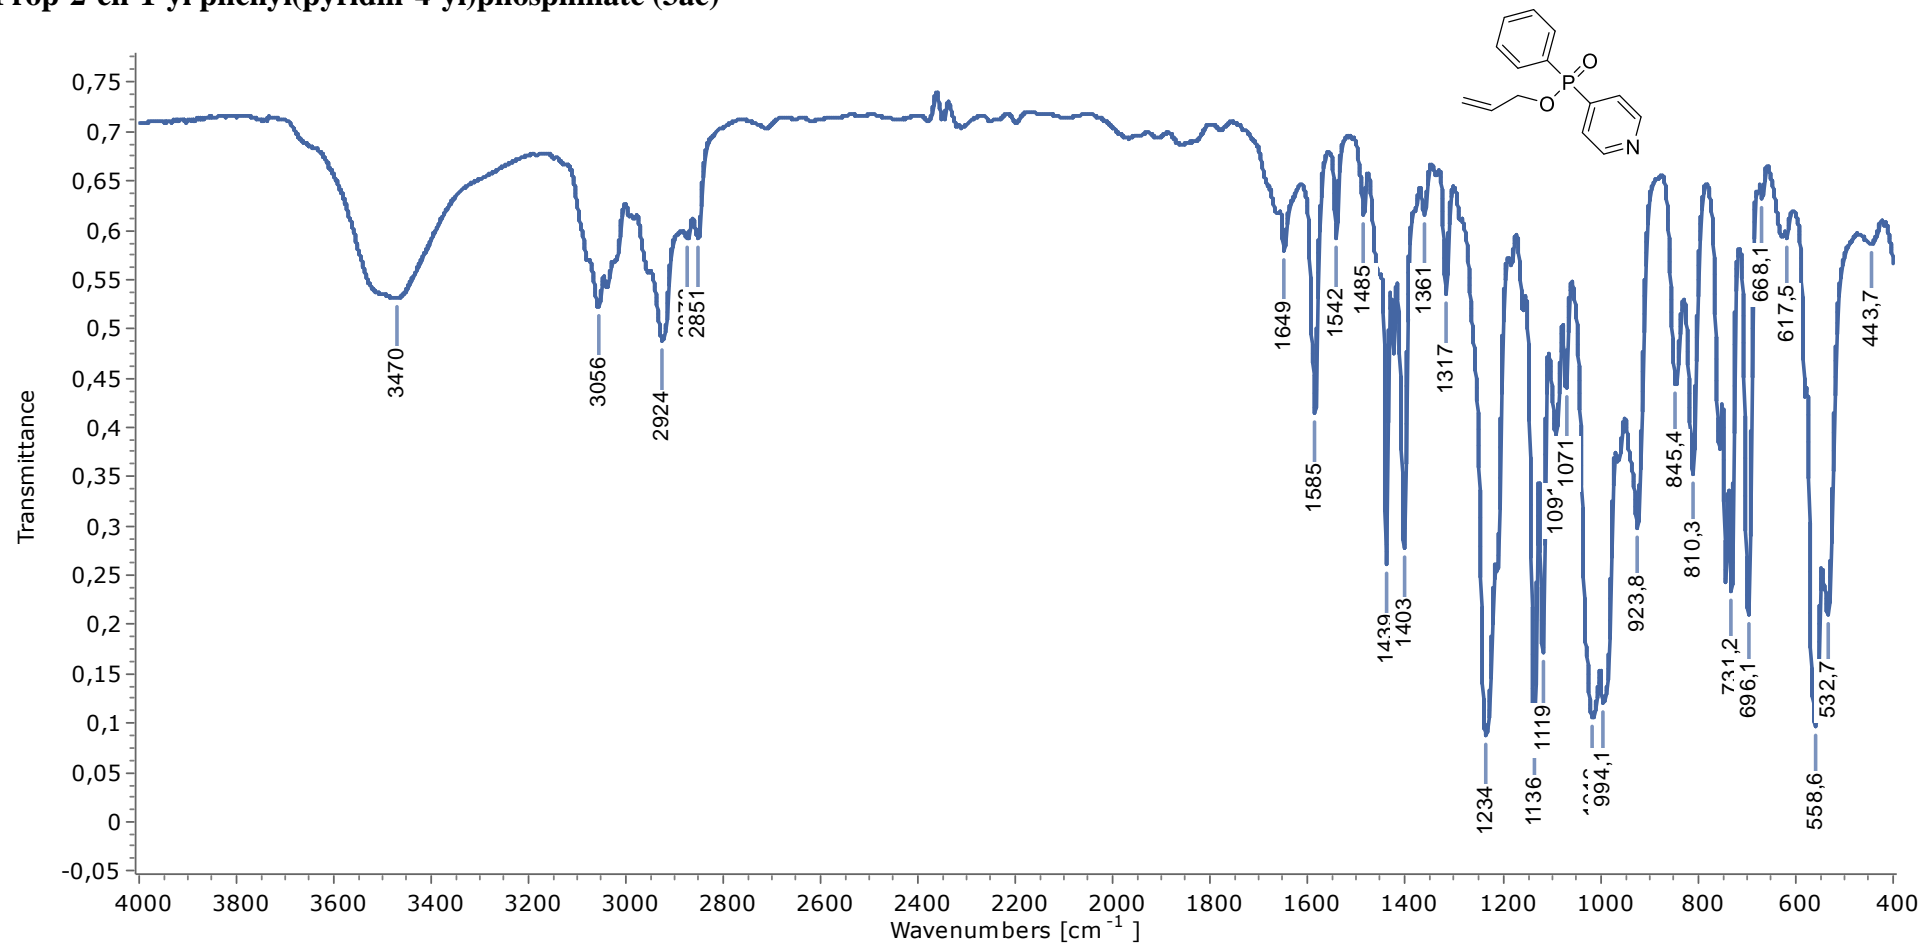

**Prop-2-en-1-yl (3-methylpyridin-4-yl)phenylphosphinate (3be)**

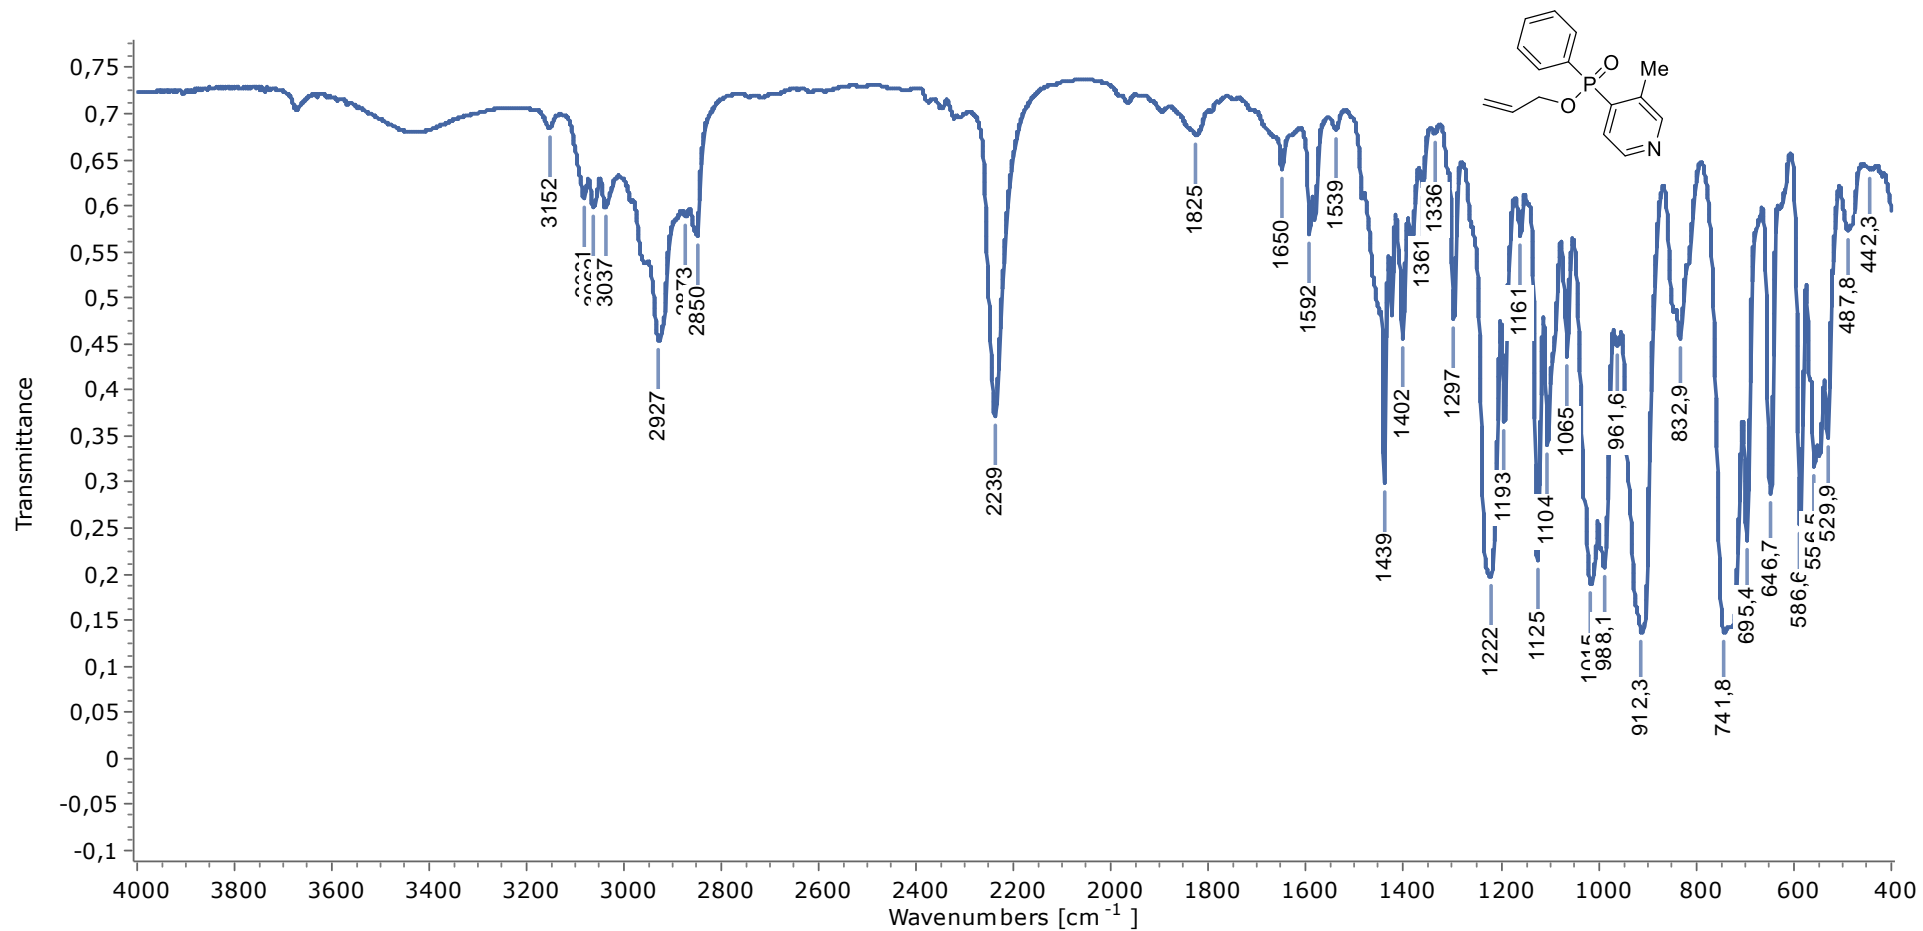

Supplement: d4ob00661e1.pdf [file d4ob00661e1.pdf]
